# Supplementary material
Source: publisher figshare collection journal article supplement (https://gsapubs.figshare.com/articles/dataset/_/21067267)
Supplement: Supplementary file 1 [file 1]

Lebing Fu, Leon Bagas, Junhao Wei, Yao Chen, Jiajie Chen, Xu Zhao, Zhixin Zhao, Aobing Li, and Weikang Zhang, 2022, Growth of early Paleozoic continental crust linked to the Proto-Tethys subduction and continental collision in the East Kunlun Orogen: GSA Bulletin, <https://doi.org/10.1130/B36292.1>.

## Supplemental Material

**Text.** Analytical Methods.

**Table S1.** Age compilation for Precambrian metamorphic supracrustal rocks from the EKO.

**Table S2.** Age compilation for Neoproterozoic plutons from the EKO.

**Table S3.** Age compilation for early Paleozoic ophiolites and related rocks from the EKO.

**Table S4.** Age compilation for UP-UHP metamorphic rocks from the EKO.

**Table S5.** Age compilation for early Paleozoic igneous rocks from the EKO.

**Table S6.** LA–ICP–MS zircon U–Pb dating data of intrusions from the Xiangride-Kuhai, EKO.

**Table S7.** Major (wt%) and trace elements (ppm) compositions of intrusions from the Xiangride-Kuhai, EKO.

**Table S8.** Sr–Nd isotopic compositions of intrusions from the Xiangride-Kuhai, EKO.

**Table S9.** Hf isotopic compositions of intrusions from the Xiangride-Kuhai, EKO.

## **Analytical methods**

### **Zircon U–Pb dating**

Zircon separation from the bulk rock was carried out using magnetic and density techniques at the Langfang Regional Geological Survey Institute in the Hebei Province, China. The Cathodoluminescence (CL) images of zircons without visible inclusions were collected in the electron microprobe laboratory at the State Key Laboratory of Geological Processes and Mineral Resources (GPMR), China University of Geosciences (CUG), Wuhan.

Zircon laser ablation inductively coupled plasma mass spectrometer (LA-ICP-MS) U-Pb dating was conducted at the State Key Laboratory for Mineral Deposits Research (MDR), Nanjing University (for Qurelong Monzodiorite, Kengdenongshe Intrusion, biotite monzogranite and quartz diorite from the Walega Intrusive Complex) and GPMR (for Langmuri Intrusion) respectively. At the MDR, we used an Agilent 7500 ICP-MS equipped with a New Wave Research 213 nm laser ablation system to acquire ion-signal intensities. The beam diameter was 30  $\mu\text{m}$  and the carrier gas was Helium which was mixed with Argon in a mixing chamber. GJ-1 and Mud Tank zircon standards were analyzed between each 6 unknown sample spot analyses. Detailed analytical procedures are similar to those summarized by Jackson et al. (2004). At the GPMR, we use the same mass spectrometer equipped with a GeoLas 2005 laser system. The carrier and mixing gases, and analytical procedures are almost the same as that at the MDR, but with a larger beam diameter (32  $\mu\text{m}$ ) and different standards (91500 and GJ-1) (Liu et al., 2010). The off-line data reduction was conducted using *GLITTER* and *ICPMSDataCal* for data obtained from the MDR and GPMR respectively (Liu et al., 2010). Common Pb contents were evaluated using the method described by Andersen (2002). Concordia diagrams and weighted mean calculations were made using the Isoplot Version 3.75 (Ludwig, 2012).

### **Major and trace elements determination**

Fresh rock samples were crushed and powdered to less than 200 mesh by an agate ring mill. The major element analyses were carried out at the Australian Laboratory Services' (ALS) Chemex (Guangzhou) Co. Ltd using X-ray fluorescence (XRF) spectrometer. The analytical precision is better than 5%.

Trace elements of samples were analyzed at the GPMR.  $\text{HF}+\text{HNO}_3$  was used to digest powdered samples in Teflon bombs. Data were obtained using Agilent 7500 ICP-MS, and rock standards (AGV-2, BHVO-2, BCR-2, and RGM-2 at the GPMR) were also analyzed during the processes. The analytical precision is better than 10%. The detailed sample-digesting procedure for ICP-MS analysis is the same as Liu et al. (2008).

### **Sr–Nd isotope analyses**

Sr–Nd compositions of samples from the Xiangride-Kuhai area were analyzed in the GPMR using Finnigan Mat 262 thermal ionization mass spectrometer. Sample powders were firstly spiked with mixed isotope tracers and then dissolved with  $\text{HCl}+\text{HClO}_4/\text{HNO}_3$  mixing acids. Conventional cation exchange techniques were used to separate the isotopes.  $^{146}\text{Nd}/^{144}\text{Nd}$  and  $^{88}\text{Sr}/^{86}\text{Sr}$  values were normalized to

0.7219 and 8.3752 respectively to correct mass fractionation. Sr (NBS987) and Nd (BCR-2) standards were analyzed to monitor the instrument working conditions during analysis. The precisions for  $^{87}\text{Rb}/^{86}\text{Sr}$ ,  $^{147}\text{Sm}/^{144}\text{Nd}$  are better than 1% and 0.5%, respectively.

### In situ Hf isotope determination

In situ zircon Lu–Hf isotope analyses were carried out on the dated zircon grains with sampling spots identical to U–Pb analyses or in the same oscillatory zones. Zircons from the Qurelong Monzodiorite, Kengdenongshe Intrusion, and biotite monzogranite and quartz diorite of the Walega Intrusive Complex were conducted at the MDR using a New Wave UP193FX laser-ablation system combined with a Neptune multi-collector ICP-MS. The analytical process and instrument conditions were similar to those described by Hou et al. (2007). Samples were collected by the laser beam with a diameter of 35  $\mu\text{m}$  and then the ablated samples were transported to the ICP-MS torch through He and Ar carrier gases. The isotopes were measured simultaneously in the static-collection mode. Correction for isobaric interferences followed Iizuka and Hirata (2005). To monitor instrument performance conditions and analytical accuracy, the reference zircon Mud Tank and the standard zircon 91500 were analyzed during the process, yielding  $^{176}\text{Hf}/^{177}\text{Hf}$  values of  $0.282495 \pm 0.000019$  ( $2\sigma$ ) and  $0.282302 \pm 0.000024$  ( $2\sigma$ ) respectively.

Lu–Hf isotopic data of zircons from the Langmuri Intrusion were gained using a Neptune Plus MC-ICP-MS combined with a Geolas 2005 excimer ArF laser ablation system at the GPRM. The sampling spot size was 44  $\mu\text{m}$  and the energy density applied was 15–20  $\text{J}/\text{cm}^2$  during analyses. Zircon 91500 as an external standard and GJ-1 as unknown were analyzed simultaneously (Hu et al., 2012). The obtained Hf isotope compositions were  $0.282322 \pm 0.000015$  ( $1\sigma$ ) for 91500 and  $0.282018 \pm 0.000014$  ( $1\sigma$ ) for GJ-1. Off-line selection and integration of analytical signals and mass bias calibrations were carried out using *ICPMSDataCal* (Liu et al., 2008).

### References

- Andersen, T., 2002, Correction of common lead in U–Pb analyses that do not report  $^{204}\text{Pb}$ : *Chemical Geology*, v. 192, no. 1, p. 59–79, [https://doi.org/10.1016/S0009-2541\(02\)00195-X](https://doi.org/10.1016/S0009-2541(02)00195-X).
- Hu, Z.C., Liu, Y.S., Gao, S., Liu, W.G., Zhang, W., Tong, X.R., Lin, L., Zong, K.Q., Li, M., Chen, H.H., Zhou, L., and Yang, L., 2012, Improved in situ Hf isotope ratio analysis of zircon using newly designed X skimmer cone and jet sample cone in combination with the addition of nitrogen by laser ablation multiple collector ICP-MS: *Journal of Analytical Atomic Spectrometry*, v. 27, no. 9, p. 1391–1399, <https://doi.org/10.1039/c2ja30078h>.
- Iizuka, T., and Hirata, T., 2005, Improvements of precision and accuracy in in situ Hf isotope microanalysis of zircon using the laser ablation-MC-ICPMS technique: *Chemical Geology*, v. 220, no. 1, p. 121–137, <https://doi.org/10.1016/j.chemgeo.2005.03.010>.
- Jackson, S.E., Pearson, N.J., Griffin, W.L., and Belousova, E.A., 2004, The application of laser ablation-inductively coupled plasma-mass spectrometry to in situ U–Pb zircon geochronology: *Chemical Geology*, v. 211, no. p. 47–69, <https://doi.org/10.1016/j.chemgeo.2004.06.017>.
- Liu, Y.S., Hu, Z.C., Zong, K.Q., Gao, C.G., Gao, S., Xu, J., and Chen, H.H., 2010, Reappraisal and

- refinement of zircon U-Pb isotope and trace element analyses by LA-ICP-MS: Chinese Science Bulletin, v. 55, no. 15, p. 1535–1546, <https://doi.org/10.1007/s11434-010-3052-4>.
- Liu, Y.S., Zong, K.Q., Kelemen, P., and Gao, S., 2008, Geochemistry and magmatic history of eclogites and ultramafic rocks from the Chinese continental scientific drill hole: Subduction and ultrahigh-pressure metamorphism of lower crustal cumulates: Chemical Geology, v. 247, no. 1-2, p. 133–153, <https://doi.org/10.1016/j.chemgeo.2007.10.016>.
- Ludwig, K.R., 2012, User's manual for Isoplot 3.75—A geochronological toolkit for Microsoft Excel: Berkeley, Berkeley Geochronology Center Special Publication No. 5, 75 p.
- Hou, K.J., Li, Y.H., Zou, T.R., Qu, X.M., Shi, Y.R., and Xie, G.Q., 2007. Laser ablation-MC-ICP-MS technique for Hf isotope microanalysis of zircon and its geological applications: Acta Petrologica Sinica, v. 23, no. 10, p. 2595–2604.

Table S6. LA-ICP-MS zircon U-Pb dating data of intrusions from the Xiangride-Kuhai, EKO

| Spot                                                           | Th  | U    | Th/U | U-Th-Pb isotopic ratio               |        |                                     |        |                                     |        | Age (Ma)                             |    |                                     |    |                                     |    |
|----------------------------------------------------------------|-----|------|------|--------------------------------------|--------|-------------------------------------|--------|-------------------------------------|--------|--------------------------------------|----|-------------------------------------|----|-------------------------------------|----|
| No.                                                            | ppm | ppm  |      | <sup>207</sup> Pb/ <sup>206</sup> Pb | 1σ     | <sup>207</sup> Pb/ <sup>235</sup> U | 1σ     | <sup>206</sup> Pb/ <sup>238</sup> U | 1σ     | <sup>207</sup> Pb/ <sup>206</sup> Pb | 1σ | <sup>207</sup> Pb/ <sup>235</sup> U | 1σ | <sup>206</sup> Pb/ <sup>238</sup> U | 1σ |
| Qurelong Monzodiorite from the South Kunlun Belt (B1301-1)     |     |      |      |                                      |        |                                     |        |                                     |        |                                      |    |                                     |    |                                     |    |
| 01                                                             | 199 | 204  | 0.98 | 0.0560                               | 0.0015 | 0.5880                              | 0.0153 | 0.0759                              | 0.0008 | 454                                  | 57 | 470                                 | 10 | 472                                 | 5  |
| 02                                                             | 156 | 216  | 0.72 | 0.0577                               | 0.0014 | 0.6030                              | 0.0139 | 0.0757                              | 0.0007 | 520                                  | 52 | 479                                 | 9  | 470                                 | 4  |
| 03                                                             | 259 | 361  | 0.72 | 0.0560                               | 0.0011 | 0.5887                              | 0.0117 | 0.0759                              | 0.0007 | 454                                  | 44 | 470                                 | 8  | 471                                 | 4  |
| 04                                                             | 335 | 360  | 0.93 | 0.0575                               | 0.0011 | 0.6047                              | 0.0123 | 0.0758                              | 0.0006 | 509                                  | 44 | 480                                 | 8  | 471                                 | 4  |
| 05                                                             | 210 | 259  | 0.81 | 0.0587                               | 0.0015 | 0.6136                              | 0.0156 | 0.0757                              | 0.0009 | 554                                  | 56 | 486                                 | 10 | 470                                 | 5  |
| 06                                                             | 456 | 554  | 0.82 | 0.0597                               | 0.0012 | 0.6268                              | 0.0131 | 0.0755                              | 0.0008 | 591                                  | 43 | 494                                 | 8  | 469                                 | 5  |
| 07                                                             | 293 | 402  | 0.73 | 0.0565                               | 0.0012 | 0.5929                              | 0.0131 | 0.0756                              | 0.0007 | 478                                  | 42 | 473                                 | 8  | 470                                 | 4  |
| 08                                                             | 356 | 456  | 0.78 | 0.0579                               | 0.0012 | 0.6086                              | 0.0128 | 0.0756                              | 0.0007 | 528                                  | 43 | 483                                 | 8  | 470                                 | 4  |
| 09                                                             | 362 | 433  | 0.84 | 0.0585                               | 0.0011 | 0.6140                              | 0.0119 | 0.0758                              | 0.0008 | 550                                  | 41 | 486                                 | 7  | 471                                 | 5  |
| 10                                                             | 346 | 446  | 0.78 | 0.0567                               | 0.0011 | 0.5962                              | 0.0125 | 0.0758                              | 0.0007 | 480                                  | 43 | 475                                 | 8  | 471                                 | 4  |
| 11                                                             | 370 | 383  | 0.97 | 0.0586                               | 0.0012 | 0.6123                              | 0.0128 | 0.0758                              | 0.0008 | 550                                  | 44 | 485                                 | 8  | 471                                 | 5  |
| 12                                                             | 328 | 386  | 0.85 | 0.0561                               | 0.0012 | 0.5892                              | 0.0129 | 0.0758                              | 0.0007 | 454                                  | 48 | 470                                 | 8  | 471                                 | 4  |
| 13                                                             | 252 | 329  | 0.76 | 0.0565                               | 0.0013 | 0.5930                              | 0.0142 | 0.0760                              | 0.0008 | 472                                  | 52 | 473                                 | 9  | 472                                 | 5  |
| 14                                                             | 295 | 392  | 0.75 | 0.0560                               | 0.0011 | 0.5886                              | 0.0125 | 0.0759                              | 0.0008 | 454                                  | 44 | 470                                 | 8  | 472                                 | 5  |
| 15                                                             | 133 | 184  | 0.72 | 0.0588                               | 0.0018 | 0.6159                              | 0.0191 | 0.0758                              | 0.0009 | 561                                  | 69 | 487                                 | 12 | 471                                 | 5  |
| 16                                                             | 299 | 405  | 0.74 | 0.0571                               | 0.0011 | 0.5994                              | 0.0121 | 0.0758                              | 0.0007 | 494                                  | 43 | 477                                 | 8  | 471                                 | 4  |
| 17                                                             | 258 | 367  | 0.70 | 0.0573                               | 0.0013 | 0.6015                              | 0.0146 | 0.0759                              | 0.0009 | 506                                  | 50 | 478                                 | 9  | 471                                 | 5  |
| 18                                                             | 120 | 187  | 0.64 | 0.0791                               | 0.0014 | 2.2186                              | 0.0411 | 0.2031                              | 0.0021 | 1176                                 | 34 | 1187                                | 13 | 1192                                | 11 |
| Kengdenongshe Intrusion from the Central Kunlun Belt (B8142-3) |     |      |      |                                      |        |                                     |        |                                     |        |                                      |    |                                     |    |                                     |    |
| 01                                                             | 690 | 1238 | 0.56 | 0.0820                               | 0.0018 | 0.8093                              | 0.0217 | 0.0716                              | 0.0009 | 1247                                 | 43 | 602                                 | 12 | 446                                 | 6  |
| 02                                                             | 16  | 680  | 0.02 | 0.0563                               | 0.0019 | 0.5524                              | 0.0168 | 0.0712                              | 0.0009 | 463                                  | 75 | 447                                 | 11 | 443                                 | 6  |
| 03                                                             | 687 | 1798 | 0.38 | 0.0718                               | 0.0016 | 0.7098                              | 0.0191 | 0.0717                              | 0.0009 | 981                                  | 44 | 545                                 | 11 | 446                                 | 6  |
| 04                                                             | 25  | 828  | 0.03 | 0.0573                               | 0.0013 | 0.5736                              | 0.0160 | 0.0726                              | 0.0010 | 504                                  | 50 | 460                                 | 10 | 452                                 | 6  |
| 05                                                             | 585 | 1691 | 0.35 | 0.0665                               | 0.0015 | 0.6611                              | 0.0181 | 0.0721                              | 0.0010 | 822                                  | 46 | 515                                 | 11 | 449                                 | 6  |

|    |     |      |      |        |        |        |        |        |        |      |    |      |    |      |    |
|----|-----|------|------|--------|--------|--------|--------|--------|--------|------|----|------|----|------|----|
| 06 | 81  | 1082 | 0.08 | 0.0727 | 0.0015 | 0.7270 | 0.0192 | 0.0725 | 0.0010 | 1006 | 42 | 555  | 11 | 451  | 6  |
| 07 | 75  | 1473 | 0.05 | 0.0601 | 0.0027 | 0.5887 | 0.0271 | 0.0710 | 0.0012 | 608  | 92 | 470  | 17 | 442  | 7  |
| 08 | 171 | 355  | 0.48 | 0.0602 | 0.0021 | 0.5987 | 0.0231 | 0.0721 | 0.0011 | 612  | 75 | 476  | 15 | 449  | 6  |
| 09 | 74  | 786  | 0.09 | 0.0579 | 0.0022 | 0.5653 | 0.0198 | 0.0708 | 0.0010 | 526  | 84 | 455  | 13 | 441  | 6  |
| 10 | 18  | 394  | 0.05 | 0.0753 | 0.0023 | 0.7417 | 0.0251 | 0.0714 | 0.0010 | 1077 | 59 | 563  | 15 | 445  | 6  |
| 11 | 23  | 826  | 0.03 | 0.0608 | 0.0014 | 0.6011 | 0.0171 | 0.0717 | 0.0010 | 633  | 50 | 478  | 11 | 446  | 6  |
| 12 | 83  | 83   | 1.00 | 0.0769 | 0.0020 | 2.0364 | 0.0606 | 0.1921 | 0.0026 | 1119 | 50 | 1128 | 20 | 1133 | 14 |
| 13 | 85  | 84   | 1.01 | 0.0840 | 0.0020 | 1.9394 | 0.0559 | 0.1675 | 0.0023 | 1292 | 46 | 1095 | 19 | 999  | 13 |

Biotite monzogranite from the Walega Intrusive Complex, Central Kunlun Belt (B1107)

|    |     |     |      |        |        |        |        |        |        |      |     |      |    |      |    |
|----|-----|-----|------|--------|--------|--------|--------|--------|--------|------|-----|------|----|------|----|
| 01 | 239 | 333 | 0.72 | 0.0568 | 0.0014 | 0.5555 | 0.0162 | 0.0710 | 0.0010 | 483  | 55  | 449  | 11 | 442  | 6  |
| 02 | 226 | 606 | 0.37 | 0.0554 | 0.0023 | 0.5368 | 0.0205 | 0.0703 | 0.0010 | 428  | 93  | 436  | 14 | 438  | 6  |
| 03 | 143 | 328 | 0.44 | 0.0696 | 0.0015 | 1.4881 | 0.0398 | 0.1551 | 0.0021 | 917  | 44  | 926  | 16 | 929  | 11 |
| 04 | 139 | 462 | 0.30 | 0.0545 | 0.0012 | 0.5346 | 0.0149 | 0.0711 | 0.0010 | 393  | 52  | 435  | 10 | 443  | 6  |
| 05 | 132 | 370 | 0.36 | 0.0563 | 0.0024 | 0.5445 | 0.0224 | 0.0702 | 0.0010 | 464  | 99  | 441  | 15 | 437  | 6  |
| 06 | 333 | 563 | 0.59 | 0.0548 | 0.0030 | 0.5358 | 0.0277 | 0.0709 | 0.0010 | 405  | 124 | 436  | 18 | 441  | 6  |
| 07 | 627 | 452 | 1.39 | 0.0645 | 0.0015 | 0.6313 | 0.0181 | 0.0710 | 0.0010 | 759  | 51  | 497  | 11 | 442  | 6  |
| 08 | 71  | 89  | 0.80 | 0.0801 | 0.0018 | 2.2784 | 0.0640 | 0.2062 | 0.0028 | 1200 | 46  | 1206 | 20 | 1209 | 15 |
| 09 | 104 | 242 | 0.43 | 0.0549 | 0.0013 | 0.5365 | 0.0150 | 0.0709 | 0.0009 | 406  | 52  | 436  | 10 | 442  | 6  |
| 10 | 127 | 466 | 0.27 | 0.0609 | 0.0014 | 0.5966 | 0.0169 | 0.0711 | 0.0010 | 635  | 52  | 475  | 11 | 443  | 6  |
| 11 | 287 | 483 | 0.59 | 0.0672 | 0.0028 | 1.3118 | 0.0507 | 0.1416 | 0.0019 | 843  | 87  | 851  | 22 | 854  | 11 |
| 12 | 217 | 586 | 0.37 | 0.0557 | 0.0014 | 0.5420 | 0.0162 | 0.0706 | 0.0010 | 440  | 58  | 440  | 11 | 440  | 6  |
| 13 | 193 | 295 | 0.65 | 0.0551 | 0.0013 | 0.5361 | 0.0155 | 0.0706 | 0.0009 | 416  | 55  | 436  | 10 | 440  | 6  |
| 14 | 398 | 697 | 0.57 | 0.0593 | 0.0013 | 0.5783 | 0.0158 | 0.0708 | 0.0009 | 577  | 49  | 463  | 10 | 441  | 6  |
| 15 | 106 | 247 | 0.43 | 0.0577 | 0.0029 | 0.5556 | 0.0267 | 0.0698 | 0.0010 | 520  | 113 | 449  | 17 | 435  | 6  |
| 16 | 92  | 287 | 0.32 | 0.0569 | 0.0014 | 0.5550 | 0.0165 | 0.0708 | 0.0010 | 487  | 57  | 448  | 11 | 441  | 6  |
| 17 | 61  | 433 | 0.14 | 0.0564 | 0.0014 | 0.5496 | 0.0160 | 0.0707 | 0.0010 | 467  | 55  | 445  | 10 | 440  | 6  |
| 18 | 152 | 397 | 0.38 | 0.0544 | 0.0013 | 0.5284 | 0.0151 | 0.0705 | 0.0009 | 386  | 55  | 431  | 10 | 439  | 6  |

Quartz diorite from the Walega Intrusive Complex, Central Kunlun Belt (B70002-2)

|    |     |      |      |        |        |        |        |        |        |     |    |     |   |     |   |
|----|-----|------|------|--------|--------|--------|--------|--------|--------|-----|----|-----|---|-----|---|
| 01 | 915 | 1493 | 0.61 | 0.0545 | 0.0012 | 0.5209 | 0.0116 | 0.0693 | 0.0007 | 394 | 50 | 426 | 8 | 432 | 4 |
|----|-----|------|------|--------|--------|--------|--------|--------|--------|-----|----|-----|---|-----|---|

|    |      |      |      |        |        |        |        |        |        |     |    |     |    |     |   |
|----|------|------|------|--------|--------|--------|--------|--------|--------|-----|----|-----|----|-----|---|
| 02 | 986  | 1766 | 0.56 | 0.0548 | 0.0011 | 0.5224 | 0.0110 | 0.0689 | 0.0006 | 467 | 44 | 427 | 7  | 430 | 4 |
| 03 | 857  | 1364 | 0.63 | 0.0563 | 0.0012 | 0.5399 | 0.0129 | 0.0694 | 0.0008 | 461 | 48 | 438 | 8  | 432 | 5 |
| 04 | 1241 | 1800 | 0.69 | 0.0577 | 0.0014 | 0.5533 | 0.0169 | 0.0689 | 0.0008 | 517 | 54 | 447 | 11 | 429 | 5 |
| 05 | 892  | 1479 | 0.60 | 0.0549 | 0.0011 | 0.5219 | 0.0102 | 0.0689 | 0.0006 | 409 | 44 | 426 | 7  | 429 | 3 |
| 06 | 823  | 1205 | 0.68 | 0.0549 | 0.0012 | 0.5251 | 0.0122 | 0.0693 | 0.0007 | 406 | 45 | 429 | 8  | 432 | 4 |
| 07 | 210  | 1786 | 0.12 | 0.0559 | 0.0015 | 0.5310 | 0.0147 | 0.0688 | 0.0008 | 450 | 61 | 432 | 10 | 429 | 5 |
| 08 | 1218 | 1692 | 0.72 | 0.0552 | 0.0010 | 0.5291 | 0.0105 | 0.0694 | 0.0007 | 420 | 36 | 431 | 7  | 432 | 4 |
| 09 | 884  | 1143 | 0.77 | 0.0547 | 0.0011 | 0.5233 | 0.0108 | 0.0694 | 0.0007 | 398 | 44 | 427 | 7  | 432 | 4 |
| 10 | 581  | 1071 | 0.54 | 0.0578 | 0.0012 | 0.5486 | 0.0109 | 0.0690 | 0.0006 | 520 | 46 | 444 | 7  | 430 | 4 |
| 11 | 1936 | 2573 | 0.75 | 0.0557 | 0.0009 | 0.5343 | 0.0093 | 0.0692 | 0.0006 | 439 | 5  | 435 | 6  | 432 | 3 |
| 12 | 1201 | 1840 | 0.65 | 0.0542 | 0.0012 | 0.5187 | 0.0112 | 0.0693 | 0.0007 | 376 | 53 | 424 | 8  | 432 | 4 |
| 13 | 1082 | 2509 | 0.43 | 0.0532 | 0.0010 | 0.5100 | 0.0107 | 0.0693 | 0.0008 | 345 | 44 | 418 | 7  | 432 | 5 |
| 14 | 875  | 2562 | 0.34 | 0.0615 | 0.0014 | 0.5860 | 0.0136 | 0.0687 | 0.0006 | 657 | 50 | 468 | 9  | 429 | 4 |
| 15 | 933  | 1385 | 0.67 | 0.0550 | 0.0013 | 0.5264 | 0.0121 | 0.0693 | 0.0008 | 413 | 47 | 429 | 8  | 432 | 5 |
| 16 | 1027 | 1955 | 0.53 | 0.0571 | 0.0012 | 0.5475 | 0.0123 | 0.0690 | 0.0005 | 494 | 44 | 443 | 8  | 430 | 3 |
| 17 | 1195 | 2063 | 0.58 | 0.0527 | 0.0010 | 0.5032 | 0.0093 | 0.0690 | 0.0006 | 322 | 47 | 414 | 6  | 430 | 4 |
| 18 | 321  | 2861 | 0.11 | 0.0559 | 0.0013 | 0.5335 | 0.0122 | 0.0688 | 0.0006 | 450 | 52 | 434 | 8  | 429 | 4 |

Langmuri Intrusion from the Central Kunlun Belt (CL290)

|    |     |      |      |        |        |        |        |        |        |      |    |      |    |      |    |
|----|-----|------|------|--------|--------|--------|--------|--------|--------|------|----|------|----|------|----|
| 01 | 383 | 1931 | 0.20 | 0.0723 | 0.0010 | 1.4761 | 0.0200 | 0.1476 | 0.0010 | 994  | 34 | 921  | 8  | 888  | 6  |
| 02 | 137 | 481  | 0.29 | 0.0552 | 0.0018 | 0.4989 | 0.0150 | 0.0656 | 0.0007 | 420  | 77 | 411  | 10 | 410  | 4  |
| 03 | 147 | 662  | 0.22 | 0.0553 | 0.0018 | 0.5029 | 0.0176 | 0.0657 | 0.0008 | 433  | 74 | 414  | 12 | 410  | 5  |
| 04 | 116 | 379  | 0.30 | 0.0550 | 0.0014 | 0.5039 | 0.0136 | 0.0662 | 0.0008 | 413  | 62 | 414  | 9  | 413  | 5  |
| 05 | 52  | 267  | 0.19 | 0.0564 | 0.0019 | 0.5096 | 0.0180 | 0.0653 | 0.0008 | 478  | 72 | 418  | 12 | 408  | 5  |
| 06 | 58  | 249  | 0.23 | 0.0549 | 0.0021 | 0.4962 | 0.0185 | 0.0655 | 0.0008 | 409  | 87 | 409  | 13 | 409  | 5  |
| 07 | 146 | 553  | 0.26 | 0.0539 | 0.0011 | 0.4913 | 0.0117 | 0.0658 | 0.0008 | 369  | 46 | 406  | 8  | 411  | 5  |
| 08 | 89  | 186  | 0.48 | 0.0853 | 0.0021 | 2.6196 | 0.0694 | 0.2221 | 0.0030 | 1324 | 47 | 1306 | 19 | 1293 | 16 |
| 09 | 86  | 265  | 0.32 | 0.0528 | 0.0018 | 0.4760 | 0.0181 | 0.0651 | 0.0008 | 320  | 80 | 395  | 12 | 407  | 5  |
| 10 | 95  | 464  | 0.21 | 0.0730 | 0.0014 | 1.2303 | 0.0449 | 0.1209 | 0.0033 | 1017 | 39 | 814  | 20 | 736  | 19 |
| 11 | 197 | 614  | 0.32 | 0.0557 | 0.0011 | 0.5027 | 0.0097 | 0.0654 | 0.0005 | 443  | 43 | 414  | 7  | 409  | 3  |

|    |     |     |      |        |        |        |        |        |        |      |    |      |    |      |    |
|----|-----|-----|------|--------|--------|--------|--------|--------|--------|------|----|------|----|------|----|
| 12 | 48  | 347 | 0.14 | 0.0563 | 0.0015 | 0.5054 | 0.0140 | 0.0651 | 0.0009 | 465  | 59 | 415  | 9  | 406  | 5  |
| 13 | 551 | 816 | 0.68 | 0.0882 | 0.0015 | 2.7978 | 0.0516 | 0.2295 | 0.0021 | 1387 | 33 | 1355 | 14 | 1332 | 11 |
| 14 | 63  | 176 | 0.36 | 0.0565 | 0.0021 | 0.5942 | 0.0280 | 0.0757 | 0.0019 | 472  | 81 | 474  | 18 | 470  | 11 |
| 15 | 329 | 726 | 0.45 | 0.0555 | 0.0021 | 0.4944 | 0.0167 | 0.0646 | 0.0012 | 435  | 86 | 408  | 11 | 404  | 7  |
| 16 | 188 | 540 | 0.35 | 0.0552 | 0.0015 | 0.4975 | 0.0142 | 0.0653 | 0.0005 | 420  | 58 | 410  | 10 | 408  | 3  |
| 17 | 161 | 676 | 0.24 | 0.0564 | 0.0012 | 0.5068 | 0.0113 | 0.0650 | 0.0005 | 478  | 44 | 416  | 8  | 406  | 3  |
| 18 | 139 | 462 | 0.30 | 0.0605 | 0.0018 | 0.5461 | 0.0183 | 0.0652 | 0.0008 | 633  | 60 | 442  | 12 | 407  | 5  |
| 19 | 121 | 443 | 0.27 | 0.0609 | 0.0022 | 0.5533 | 0.0217 | 0.0660 | 0.0014 | 635  | 84 | 447  | 14 | 412  | 9  |
| 20 | 149 | 467 | 0.32 | 0.0548 | 0.0012 | 0.4931 | 0.0113 | 0.0654 | 0.0006 | 467  | 52 | 407  | 8  | 408  | 3  |

---



Table S7. Major (wt.%) and trace elements (ppm) compositions of intrusions from the Xiangride-Kuhai, EKO

| Sample No.                                       | B1301-1 | B1302-1 | B1303-1 | B1305-1 | B1307-1 | B1308-1 | B1309-1 | B1311-1 | B1312-1 | B1313-1 | B7191-1                                              | B8166-2 | B8139-2 | B8142-1 | B8142-2 | B8155-1 |
|--------------------------------------------------|---------|---------|---------|---------|---------|---------|---------|---------|---------|---------|------------------------------------------------------|---------|---------|---------|---------|---------|
| Qurelong Monzodiorite from the South Kunlun Belt |         |         |         |         |         |         |         |         |         |         | Kengdenongshe Intrusion from the Central Kunlun Belt |         |         |         |         |         |
| SiO <sub>2</sub>                                 | 52.01   | 51.55   | 52.52   | 52.03   | 53.18   | 55.64   | 53.54   | 52.28   | 51.20   | 53.25   | 73.00                                                | 72.10   | 70.80   | 70.90   | 73.30   | 75.20   |
| TiO <sub>2</sub>                                 | 1.36    | 1.34    | 1.32    | 1.34    | 1.28    | 1.13    | 1.30    | 1.30    | 1.40    | 1.26    | 0.27                                                 | 0.40    | 0.43    | 0.52    | 0.27    | 0.10    |
| Al <sub>2</sub> O <sub>3</sub>                   | 16.61   | 16.36   | 16.52   | 16.50   | 16.42   | 15.88   | 15.90   | 16.78   | 16.80   | 16.76   | 13.70                                                | 14.10   | 14.55   | 14.30   | 13.90   | 12.85   |
| Fe <sub>2</sub> O <sub>3</sub>                   | 10.24   | 9.60    | 9.46    | 9.77    | 9.21    | 8.29    | 9.02    | 9.45    | 10.28   | 9.00    | 1.85                                                 | 1.94    | 2.12    | 2.40    | 1.48    | 1.58    |
| MnO                                              | 0.16    | 0.16    | 0.15    | 0.16    | 0.15    | 0.13    | 0.14    | 0.16    | 0.16    | 0.14    | 0.04                                                 | 0.04    | 0.04    | 0.04    | 0.03    | 0.04    |
| MgO                                              | 4.38    | 4.27    | 4.38    | 4.34    | 4.41    | 4.13    | 4.56    | 4.45    | 4.64    | 4.28    | 0.52                                                 | 0.81    | 0.86    | 1.00    | 0.62    | 0.17    |
| CaO                                              | 7.64    | 7.38    | 7.16    | 7.39    | 7.09    | 6.36    | 7.00    | 7.51    | 7.71    | 6.89    | 1.01                                                 | 1.35    | 1.16    | 1.05    | 1.64    | 0.85    |
| Na <sub>2</sub> O                                | 3.37    | 3.29    | 3.35    | 3.34    | 3.26    | 3.04    | 3.00    | 3.45    | 3.35    | 3.47    | 3.69                                                 | 4.09    | 3.84    | 3.39    | 4.78    | 3.54    |
| K <sub>2</sub> O                                 | 1.79    | 2.29    | 2.09    | 2.06    | 2.17    | 2.61    | 2.49    | 1.74    | 1.92    | 2.07    | 3.92                                                 | 3.30    | 3.84    | 3.74    | 2.86    | 3.99    |
| P <sub>2</sub> O <sub>5</sub>                    | 0.66    | 0.61    | 0.63    | 0.63    | 0.55    | 0.45    | 0.49    | 0.60    | 0.66    | 0.55    | 0.06                                                 | 0.10    | 0.10    | 0.12    | 0.08    | 0.02    |
| LOI                                              | 1.63    | 2.65    | 1.70    | 1.99    | 1.75    | 1.49    | 2.27    | 1.63    | 1.65    | 1.70    | 1.63                                                 | 1.93    | 2.03    | 2.10    | 1.75    | 1.23    |
| Total                                            | 100.28  | 99.92   | 99.69   | 99.96   | 99.90   | 99.59   | 100.10  | 99.78   | 100.21  | 99.81   | 99.86                                                | 100.32  | 99.95   | 99.74   | 100.90  | 99.77   |
| Mg <sup>#</sup>                                  | 73.6    | 73.4    | 60.6    | 69.2    | 68.3    | 66.6    | 71.8    | 66.3    | 72.0    | 64.7    | 35.5                                                 | 45.3    | 28.1    | 28.6    | 13.6    | 4.8     |
| Sc                                               | 25.10   | 27.50   | 26.30   | 26.30   | 26.60   | 24.20   | 27.40   | 28.00   | 28.90   | 24.50   | 12.37                                                | 13.20   | 8.64    | 8.59    | 17.80   | 16.10   |
| V                                                | 268.0   | 292.0   | 267.0   | 275.7   | 261.8   | 231.0   | 272.0   | 276.0   | 287.0   | 243.0   | 17.8                                                 | 35.6    | 26.1    | 31.0    | 40.2    | 9.4     |
| Cr                                               | 47.7    | 63.7    | 80.6    | 64.0    | 96.6    | 141.0   | 132.0   | 77.7    | 64.0    | 68.4    | 8.1                                                  | 12.5    | 8.1     | 9.1     | 15.9    | 8.1     |
| Co                                               | 61.40   | 59.10   | 82.20   | 67.57   | 78.54   | 55.70   | 120.00  | 79.40   | 66.70   | 70.90   | 140.50                                               | 119.50  | 118.00  | 77.00   | 162.00  | 163.00  |
| Ni                                               | 41.3    | 45.7    | 64.1    | 50.4    | 58.6    | 55.9    | 80.9    | 59.4    | 46.9    | 50.1    | 68.0                                                 | 53.9    | 50.0    | 39.1    | 68.7    | 85.9    |
| Ga                                               | 24.5    | 24.5    | 23.9    | 24.3    | 23.8    | 21.8    | 22.2    | 25.3    | 26.1    | 23.8    | 24.6                                                 | 27.1    | 18.7    | 20.4    | 33.8    | 30.4    |
| Rb                                               | 56      | 80      | 65      | 67      | 74      | 87      | 107     | 55      | 60      | 63      | 205                                                  | 162     | 144     | 145     | 178     | 266     |
| Sr                                               | 950     | 929     | 840     | 906     | 837     | 800     | 695     | 906     | 942     | 844     | 175                                                  | 263     | 128     | 112     | 413     | 221     |
| Y                                                | 30.80   | 29.50   | 36.20   | 32.17   | 28.90   | 26.80   | 26.10   | 29.00   | 34.40   | 28.20   | 30.95                                                | 16.60   | 13.80   | 12.70   | 20.50   | 48.10   |
| Zr                                               | 142     | 158     | 279     | 193     | 217     | 204     | 209     | 245     | 177     | 250     | 190                                                  | 264     | 175     | 205     | 322     | 204     |
| Nb                                               | 20.60   | 23.00   | 23.00   | 22.20   | 20.98   | 17.70   | 20.00   | 22.40   | 24.90   | 19.90   | 20.15                                                | 20.45   | 15.90   | 20.40   | 20.50   | 24.40   |

|                    |        |        |        |        |       |       |       |       |        |        |       |        |       |       |        |        |
|--------------------|--------|--------|--------|--------|-------|-------|-------|-------|--------|--------|-------|--------|-------|-------|--------|--------|
| Ba                 | 1050   | 1170   | 1020   | 1080   | 990   | 1050  | 860   | 1080  | 931    | 1030   | 1381  | 1080   | 561   | 589   | 1570   | 2200   |
| La                 | 67.90  | 95.50  | 54.50  | 72.63  | 59.46 | 54.90 | 50.40 | 57.30 | 59.60  | 75.10  | 53.80 | 63.50  | 42.00 | 42.90 | 84.10  | 65.60  |
| Ce                 | 115.00 | 148.00 | 103.00 | 122.00 | 99.80 | 91.60 | 83.60 | 98.80 | 107.00 | 118.00 | 91.45 | 105.05 | 71.90 | 72.10 | 138.00 | 111.00 |
| Pr                 | 14.10  | 15.80  | 12.90  | 14.27  | 11.78 | 10.70 | 9.98  | 11.70 | 13.00  | 13.50  | 9.79  | 10.90  | 7.57  | 7.50  | 14.30  | 12.00  |
| Nd                 | 50.30  | 53.70  | 48.80  | 50.93  | 42.56 | 38.80 | 35.00 | 43.30 | 48.90  | 46.80  | 30.50 | 33.45  | 23.20 | 23.40 | 43.50  | 37.80  |
| Sm                 | 9.57   | 8.82   | 9.68   | 9.36   | 7.89  | 7.34  | 6.86  | 8.02  | 9.08   | 8.14   | 5.44  | 4.90   | 3.55  | 3.40  | 6.40   | 7.32   |
| Eu                 | 2.33   | 2.14   | 2.17   | 2.22   | 1.95  | 1.85  | 1.67  | 1.96  | 2.27   | 1.99   | 0.85  | 1.08   | 0.67  | 0.65  | 1.50   | 1.02   |
| Gd                 | 8.29   | 6.93   | 8.09   | 7.77   | 6.77  | 6.48  | 5.97  | 6.75  | 7.84   | 6.79   | 4.89  | 3.77   | 2.83  | 2.63  | 4.91   | 6.95   |
| Tb                 | 1.06   | 0.94   | 1.21   | 1.07   | 0.91  | 0.83  | 0.85  | 0.94  | 1.06   | 0.89   | 0.82  | 0.53   | 0.42  | 0.37  | 0.69   | 1.22   |
| Dy                 | 5.54   | 4.62   | 5.80   | 5.32   | 4.80  | 4.48  | 4.41  | 4.84  | 5.49   | 4.77   | 4.70  | 2.65   | 2.18  | 1.95  | 3.35   | 7.22   |
| Ho                 | 1.05   | 0.85   | 1.15   | 1.02   | 0.91  | 0.87  | 0.82  | 0.89  | 1.05   | 0.91   | 1.01  | 0.54   | 0.46  | 0.42  | 0.66   | 1.55   |
| Er                 | 2.89   | 2.57   | 3.35   | 2.94   | 2.62  | 2.54  | 2.46  | 2.72  | 2.76   | 2.62   | 3.14  | 1.65   | 1.44  | 1.34  | 1.95   | 4.83   |
| Tm                 | 0.38   | 0.34   | 0.43   | 0.38   | 0.35  | 0.34  | 0.32  | 0.37  | 0.40   | 0.33   | 0.49  | 0.25   | 0.23  | 0.21  | 0.29   | 0.74   |
| Yb                 | 2.27   | 2.04   | 2.86   | 2.39   | 2.16  | 2.03  | 1.98  | 2.08  | 2.53   | 2.20   | 3.43  | 1.75   | 1.69  | 1.48  | 2.01   | 5.17   |
| Lu                 | 0.31   | 0.28   | 0.41   | 0.33   | 0.31  | 0.30  | 0.28  | 0.29  | 0.37   | 0.30   | 0.52  | 0.27   | 0.26  | 0.24  | 0.30   | 0.78   |
| Hf                 | 3.12   | 3.09   | 5.80   | 4.00   | 4.18  | 4.23  | 3.63  | 4.66  | 3.56   | 4.80   | 5.53  | 6.80   | 4.55  | 5.23  | 8.36   | 6.50   |
| Ta                 | 1.23   | 1.20   | 1.33   | 1.25   | 1.25  | 1.01  | 1.51  | 1.28  | 1.33   | 1.10   | 3.17  | 3.32   | 2.44  | 2.37  | 4.27   | 3.91   |
| Pb                 | 17.1   | 17.7   | 17.2   | 17.3   | 16.6  | 19.1  | 14.8  | 19.0  | 14.5   | 15.5   | 59.6  | 30.7   | 28.2  | 22.5  | 38.9   | 90.9   |
| Th                 | 11.40  | 19.50  | 8.60   | 13.17  | 9.54  | 12.60 | 4.99  | 6.60  | 9.81   | 13.70  | 28.75 | 37.15  | 23.00 | 25.80 | 48.50  | 34.50  |
| U                  | 1.79   | 2.88   | 1.77   | 2.15   | 1.85  | 2.19  | 1.04  | 1.98  | 2.03   | 2.01   | 4.66  | 4.50   | 2.59  | 2.72  | 6.27   | 6.72   |
| Eu/Eu <sup>+</sup> | 0.78   | 0.81   | 0.73   | 0.77   | 0.79  | 0.80  | 0.78  | 0.79  | 0.80   | 0.80   | 0.49  | 0.74   | 0.62  | 0.64  | 0.79   | 0.43   |
| Sr/Y               | 30.8   | 31.5   | 23.2   | 28.5   | 29.0  | 29.9  | 26.6  | 31.2  | 27.4   | 29.9   | 5.6   | 15.8   | 9.3   | 8.8   | 20.1   | 4.6    |
| (La/Yb)            |        |        |        |        |       |       |       |       |        |        |       |        |       |       |        |        |
| N                  | 21.5   | 33.6   | 13.7   | 22.9   | 19.8  | 19.4  | 18.3  | 19.8  | 16.9   | 24.5   | 11.3  | 26.1   | 17.8  | 20.8  | 30.0   | 9.1    |

TABLE 2 CONTINUED

| Sample No.                                                                  | B1107-1 | B1108-1 | B1109-1 | B1114-1 | B1115-1 | B1116-1 | B1118-1 | B1119-1 | B1120-1 | B0802-1 | B60003-1                                                              | B60003-2 | B60003-3 | B70002-2-1 | B70801-1 |
|-----------------------------------------------------------------------------|---------|---------|---------|---------|---------|---------|---------|---------|---------|---------|-----------------------------------------------------------------------|----------|----------|------------|----------|
| Biotite monzogranite from the Walega Intrusive Complex, Central Kunlun Belt |         |         |         |         |         |         |         |         |         |         | Quartz diorite from the Walega Intrusive Complex, Central Kunlun Belt |          |          |            |          |
| SiO <sub>2</sub>                                                            | 67.90   | 69.10   | 70.30   | 70.30   | 72.00   | 72.40   | 69.60   | 69.70   | 70.50   | 68.49   | 57.66                                                                 | 62.04    | 56.72    | 57.08      | 53.86    |
| TiO <sub>2</sub>                                                            | 0.28    | 0.47    | 0.44    | 0.54    | 0.30    | 0.18    | 0.52    | 0.37    | 0.34    | 0.46    | 1.50                                                                  | 1.11     | 1.72     | 1.38       | 2.02     |
| Al <sub>2</sub> O <sub>3</sub>                                              | 17.30   | 14.75   | 14.75   | 14.65   | 14.35   | 15.45   | 15.15   | 14.90   | 14.60   | 15.20   | 15.55                                                                 | 15.95    | 15.17    | 15.98      | 14.71    |
| Fe <sub>2</sub> O <sub>3</sub>                                              | 2.13    | 1.65    | 2.99    | 2.81    | 2.20    | 1.32    | 3.60    | 2.77    | 2.35    | 3.78    | 9.28                                                                  | 6.76     | 9.86     | 9.63       | 11.46    |
| MnO                                                                         | 0.03    | 0.04    | 0.04    | 0.05    | 0.04    | 0.02    | 0.05    | 0.04    | 0.04    | 0.06    | 0.14                                                                  | 0.09     | 0.15     | 0.16       | 0.18     |
| MgO                                                                         | 1.20    | 0.87    | 0.94    | 0.99    | 0.63    | 0.66    | 0.99    | 0.72    | 0.72    | 1.04    | 2.69                                                                  | 1.82     | 3.08     | 2.59       | 3.67     |
| CaO                                                                         | 4.00    | 3.06    | 2.71    | 2.04    | 1.91    | 2.32    | 2.60    | 2.01    | 2.19    | 3.04    | 5.41                                                                  | 4.58     | 5.69     | 5.32       | 6.32     |
| Na <sub>2</sub> O                                                           | 4.52    | 2.40    | 3.13    | 2.84    | 3.37    | 4.84    | 3.41    | 3.77    | 3.11    | 3.11    | 3.61                                                                  | 3.39     | 3.75     | 3.57       | 3.87     |
| K <sub>2</sub> O                                                            | 1.58    | 6.02    | 3.84    | 4.67    | 4.11    | 2.26    | 3.46    | 4.10    | 4.22    | 3.26    | 2.09                                                                  | 2.20     | 1.80     | 2.40       | 1.66     |
| P <sub>2</sub> O <sub>5</sub>                                               | 0.09    | 0.15    | 0.14    | 0.14    | 0.10    | 0.06    | 0.22    | 0.23    | 0.10    | 0.15    | 0.58                                                                  | 0.39     | 0.41     | 0.93       | 0.41     |
| LOI                                                                         | 1.12    | 0.82    | 0.82    | 1.19    | 1.15    | 0.74    | 1.05    | 0.99    | 0.90    | 0.98    | 0.86                                                                  | 0.87     | 0.94     | 0.88       | 0.84     |
| Total                                                                       | 100.35  | 99.67   | 100.43  | 100.46  | 100.38  | 100.38  | 100.97  | 99.81   | 99.37   | 99.88   | 99.83                                                                 | 99.76    | 99.75    | 100.34     | 99.38    |
| Mg <sup>#</sup>                                                             | 24.3    | 9.8     | 12.7    | 11.2    | 11.2    | 19.9    | 12.8    | 10.5    | 11.7    | 25.1    | 37.6                                                                  | 23.9     | 43.1     | 37.9       | 50.8     |
| Sc                                                                          | 15.50   | 21.20   | 20.20   | 20.90   | 18.80   | 17.10   | 24.30   | 23.90   | 19.00   | 9.29    | 22.33                                                                 | 17.30    | 25.07    | 20.90      | 28.80    |
| V                                                                           | 64.2    | 82.2    | 89.9    | 84.2    | 52.0    | 31.3    | 96.8    | 70.8    | 59.3    | 46.2    | 135.4                                                                 | 87.1     | 166.4    | 112.0      | 207.0    |
| Cr                                                                          | 38.2    | 27.0    | 38.0    | 53.2    | 20.8    | 26.7    | 22.0    | 19.4    | 22.1    | 134.0   | 34.5                                                                  | 23.3     | 40.1     | 37.8       | 42.5     |
| Co                                                                          | 165.00  | 209.00  | 330.00  | 401.00  | 235.00  | 416.00  | 329.00  | 229.00  | 306.00  | 65.40   | 62.43                                                                 | 75.20    | 61.67    | 51.00      | 61.10    |
| Ni                                                                          | 83.8    | 81.9    | 159.0   | 202.0   | 102.0   | 206.0   | 130.0   | 111.0   | 126.0   | 82.3    | 35.4                                                                  | 36.5     | 34.8     | 33.4       | 36.3     |
| Ga                                                                          | 41.9    | 36.7    | 40.5    | 45.1    | 40.5    | 41.9    | 45.5    | 50.1    | 39.1    | 18.1    | 21.4                                                                  | 23.2     | 20.3     | 22.4       | 18.5     |
| Rb                                                                          | 118     | 354     | 245     | 501     | 393     | 216     | 365     | 452     | 331     | 117     | 87                                                                    | 104      | 78       | 91         | 67       |
| Sr                                                                          | 1170    | 813     | 718     | 474     | 450     | 727     | 804     | 471     | 626     | 425     | 352                                                                   | 545      | 321      | 301        | 209      |
| Y                                                                           | 9.65    | 58.90   | 33.70   | 42.50   | 44.90   | 13.80   | 47.60   | 65.40   | 30.20   | 14.40   | 45.70                                                                 | 37.30    | 36.90    | 63.20      | 36.60    |
| Zr                                                                          | 332     | 681     | 580     | 668     | 424     | 206     | 632     | 519     | 475     | 275     | 451                                                                   | 530      | 393      | 489        | 334      |

|         |       |        |        |        |        |       |        |        |        |        |        |        |        |        |       |
|---------|-------|--------|--------|--------|--------|-------|--------|--------|--------|--------|--------|--------|--------|--------|-------|
| Nb      | 10.10 | 36.80  | 28.80  | 35.60  | 31.50  | 9.52  | 40.10  | 53.20  | 24.10  | 13.90  | 23.23  | 26.90  | 18.47  | 28.70  | 14.10 |
| Ba      | 758   | 3280   | 2730   | 1600   | 1620   | 464   | 2240   | 1420   | 2520   | 1140   | 736    | 1420   | 631    | 550    | 238   |
| La      | 9.91  | 136.00 | 133.00 | 126.00 | 93.50  | 19.20 | 180.00 | 104.00 | 120.00 | 61.90  | 66.73  | 122.00 | 54.83  | 56.70  | 21.50 |
| Ce      | 16.60 | 255.00 | 234.00 | 242.00 | 163.00 | 36.30 | 309.00 | 181.00 | 213.00 | 111.00 | 124.77 | 220.00 | 105.23 | 105.00 | 49.30 |
| Pr      | 1.91  | 29.40  | 25.10  | 29.10  | 19.20  | 4.27  | 33.40  | 20.70  | 23.70  | 11.40  | 14.13  | 23.30  | 11.65  | 13.10  | 6.00  |
| Nd      | 7.66  | 98.10  | 84.10  | 100.00 | 67.20  | 16.00 | 108.00 | 70.20  | 80.30  | 38.40  | 50.53  | 77.70  | 41.90  | 49.20  | 24.70 |
| Sm      | 1.81  | 16.50  | 13.20  | 16.20  | 13.10  | 3.36  | 18.20  | 14.40  | 12.80  | 6.26   | 10.11  | 13.30  | 8.56   | 10.60  | 6.42  |
| Eu      | 1.96  | 2.62   | 2.53   | 2.16   | 1.42   | 1.21  | 2.81   | 1.60   | 1.94   | 1.13   | 2.19   | 2.10   | 2.14   | 2.35   | 2.13  |
| Gd      | 1.74  | 13.14  | 9.90   | 11.74  | 10.77  | 2.96  | 14.00  | 13.73  | 9.86   | 4.11   | 9.42   | 10.38  | 7.95   | 11.01  | 6.87  |
| Tb      | 0.26  | 1.96   | 1.32   | 1.63   | 1.61   | 0.44  | 1.90   | 2.25   | 1.29   | 0.58   | 1.37   | 1.46   | 1.18   | 1.61   | 1.04  |
| Dy      | 1.46  | 10.10  | 6.14   | 7.71   | 8.00   | 2.41  | 8.95   | 11.90  | 5.67   | 2.89   | 7.75   | 7.35   | 6.70   | 9.42   | 6.49  |
| Ho      | 0.30  | 2.06   | 1.16   | 1.45   | 1.46   | 0.44  | 1.57   | 2.14   | 1.02   | 0.52   | 1.54   | 1.34   | 1.35   | 1.91   | 1.38  |
| Er      | 0.89  | 5.65   | 3.30   | 4.07   | 3.99   | 1.22  | 4.30   | 5.72   | 3.05   | 1.36   | 4.42   | 3.69   | 3.65   | 5.73   | 3.85  |
| Tm      | 0.14  | 0.79   | 0.45   | 0.55   | 0.53   | 0.17  | 0.56   | 0.77   | 0.39   | 0.17   | 0.63   | 0.48   | 0.54   | 0.85   | 0.55  |
| Yb      | 1.02  | 5.22   | 3.01   | 3.28   | 3.52   | 1.11  | 3.50   | 4.56   | 2.62   | 1.25   | 4.03   | 3.01   | 3.30   | 5.53   | 3.55  |
| Lu      | 0.16  | 0.77   | 0.46   | 0.42   | 0.53   | 0.16  | 0.52   | 0.66   | 0.38   | 0.17   | 0.57   | 0.40   | 0.47   | 0.81   | 0.51  |
| Hf      | 8.07  | 16.80  | 13.70  | 16.80  | 10.40  | 5.67  | 14.30  | 12.80  | 11.50  | 6.64   | 9.32   | 12.30  | 8.62   | 8.42   | 7.24  |
| Ta      | 2.61  | 4.42   | 4.28   | 5.62   | 5.01   | 5.20  | 6.99   | 7.96   | 4.26   | 1.07   | 1.35   | 1.32   | 1.25   | 1.41   | 1.32  |
| Pb      | 62.7  | 80.7   | 63.9   | 69.0   | 77.1   | 48.3  | 65.1   | 86.7   | 63.9   | 15.7   | 13.5   | 18.9   | 15.0   | 10.9   | 10.6  |
| Th      | 2.13  | 61.30  | 44.30  | 77.90  | 69.30  | 5.61  | 57.00  | 48.40  | 45.20  | 17.40  | 16.70  | 32.10  | 15.22  | 10.70  | 7.31  |
| U       | 0.97  | 6.05   | 3.97   | 4.21   | 5.56   | 1.39  | 6.59   | 9.72   | 6.88   | 1.63   | 2.11   | 3.12   | 2.30   | 1.41   | 1.81  |
| Eu/Eu*  | 3.33  | 0.53   | 0.65   | 0.46   | 0.35   | 1.15  | 0.52   | 0.34   | 0.51   | 0.64   | 0.72   | 0.53   | 0.86   | 0.66   | 0.98  |
| Sr/Y    | 121.2 | 13.8   | 21.3   | 11.2   | 10.0   | 52.7  | 16.9   | 7.2    | 20.7   | 29.5   | 8.4    | 14.6   | 8.7    | 4.8    | 5.7   |
| (La/Yb) |       |        |        |        |        |       |        |        |        |        |        |        |        |        |       |
| N       | 7.0   | 18.7   | 31.7   | 27.6   | 19.1   | 12.4  | 36.9   | 16.4   | 32.9   | 35.5   | 13.6   | 29.1   | 12.6   | 7.4    | 4.3   |

TABLE 2 CONTINUED

| Sample No.                                      | B70801-2 | B70801-3 | CY140  | CY144  | CY147 | CY145 | CL290  | CL292 | CL293 | CL296  |
|-------------------------------------------------|----------|----------|--------|--------|-------|-------|--------|-------|-------|--------|
| Langmuri Intrusion from the Central Kunlun Belt |          |          |        |        |       |       |        |       |       |        |
| SiO <sub>2</sub>                                | 53.91    | 54.21    | 72.38  | 71.81  | 71.16 | 71.02 | 69.67  | 70.84 | 70.63 | 67.92  |
| TiO <sub>2</sub>                                | 2.06     | 2.00     | 0.14   | 0.10   | 0.17  | 0.19  | 0.21   | 0.17  | 0.19  | 0.35   |
| Al <sub>2</sub> O <sub>3</sub>                  | 14.74    | 14.81    | 16.10  | 16.52  | 15.98 | 16.21 | 16.73  | 15.92 | 16.32 | 17.37  |
| Fe <sub>2</sub> O <sub>3</sub>                  | 11.56    | 11.27    | 0.92   | 1.22   | 1.57  | 1.82  | 2.02   | 1.88  | 1.82  | 2.52   |
| MnO                                             | 0.18     | 0.17     | 0.01   | 0.01   | 0.02  | 0.02  | 0.03   | 0.03  | 0.03  | 0.04   |
| MgO                                             | 3.73     | 3.69     | 0.38   | 0.41   | 0.81  | 0.82  | 0.96   | 0.82  | 0.92  | 0.93   |
| CaO                                             | 6.36     | 6.14     | 1.95   | 3.60   | 2.18  | 2.93  | 3.49   | 2.77  | 3.06  | 3.21   |
| Na <sub>2</sub> O                               | 3.89     | 3.98     | 5.69   | 5.23   | 5.98  | 4.98  | 5.02   | 5.07  | 4.95  | 4.72   |
| K <sub>2</sub> O                                | 1.59     | 1.60     | 2.09   | 0.72   | 0.81  | 1.11  | 1.17   | 1.52  | 1.30  | 1.98   |
| P <sub>2</sub> O <sub>5</sub>                   | 0.41     | 0.42     | 0.03   | 0.05   | 0.05  | 0.04  | 0.07   | 0.06  | 0.06  | 0.05   |
| LOI                                             | 0.88     | 1.06     | 0.53   | 0.44   | 0.77  | 0.72  | 0.79   | 0.76  | 0.70  | 1.39   |
| Total                                           | 99.74    | 99.75    | 100.22 | 100.11 | 99.49 | 99.86 | 100.16 | 99.84 | 99.98 | 100.48 |
| Mg <sup>#</sup>                                 | 53.3     | 52.1     | 24.5   | 28.7   | 37.6  | 42.9  | 40.0   | 39.6  | 44.6  | 39.5   |
| Sc                                              | 28.60    | 29.30    | 2.92   | 2.05   | 3.19  | 3.46  | 3.51   | 3.78  | 3.71  | 4.92   |
| V                                               | 206.0    | 206.0    | 10.9   | 6.5    | 14.8  | 14.2  | 20.3   | 17.2  | 16.8  | 21.3   |
| Cr                                              | 46.6     | 50.4     | 14.5   | 20.2   | 52.0  | 33.8  | 33.6   | 27.0  | 22.6  | 26.4   |
| Co                                              | 54.00    | 55.80    | 1.02   | 1.49   | 2.77  | 3.05  | 3.80   | 3.01  | 3.12  | 5.53   |
| Ni                                              | 34.4     | 33.5     | 2.4    | 2.0    | 7.5   | 7.3   | 6.4    | 5.6   | 5.0   | 8.5    |
| Ga                                              | 18.2     | 19.5     | 20.5   | 17.5   | 19.6  | 17.6  | 19.7   | 18.7  | 18.4  | 19.0   |
| Rb                                              | 64       | 67       | 43     | 19     | 20    | 43    | 45     | 54    | 45    | 65     |
| Sr                                              | 209      | 210      | 778    | 754    | 553   | 532   | 614    | 498   | 506   | 533    |
| Y                                               | 35.80    | 37.60    | 6.43   | 3.99   | 6.14  | 6.56  | 5.34   | 6.59  | 5.25  | 2.39   |
| Zr                                              | 315      | 333      | 82     | 83     | 96    | 81    | 107    | 89    | 87    | 112    |

|                      |       |       |       |       |       |       |       |      |       |       |
|----------------------|-------|-------|-------|-------|-------|-------|-------|------|-------|-------|
| Nb                   | 14.00 | 14.50 | 3.19  | 1.13  | 2.54  | 3.16  | 1.73  | 3.27 | 2.02  | 2.70  |
| Ba                   | 233   | 240   | 268   | 201   | 148   | 162   | 164   | 212  | 172   | 339   |
| La                   | 20.70 | 21.80 | 9.66  | 15.69 | 8.10  | 10.99 | 6.56  | 4.63 | 8.26  | 18.04 |
| Ce                   | 46.60 | 49.10 | 21.83 | 30.31 | 18.39 | 23.55 | 13.05 | 9.31 | 17.53 | 35.36 |
| Pr                   | 5.76  | 5.89  | 2.79  | 3.57  | 2.32  | 2.89  | 1.57  | 1.14 | 2.23  | 3.94  |
| Nd                   | 23.40 | 24.60 | 11.43 | 13.58 | 9.72  | 11.54 | 6.35  | 4.71 | 8.90  | 14.33 |
| Sm                   | 5.98  | 6.41  | 2.72  | 2.33  | 2.27  | 2.55  | 1.46  | 1.35 | 1.97  | 2.07  |
| Eu                   | 2.13  | 2.21  | 0.68  | 1.21  | 0.59  | 0.71  | 0.64  | 0.53 | 0.60  | 1.00  |
| Gd                   | 6.81  | 6.67  | 1.93  | 1.60  | 1.87  | 1.93  | 1.12  | 1.30 | 1.51  | 1.14  |
| Tb                   | 1.02  | 1.07  | 0.25  | 0.19  | 0.24  | 0.26  | 0.16  | 0.22 | 0.20  | 0.11  |
| Dy                   | 6.25  | 6.51  | 1.22  | 0.84  | 1.26  | 1.38  | 0.91  | 1.33 | 1.04  | 0.45  |
| Ho                   | 1.38  | 1.34  | 0.22  | 0.14  | 0.20  | 0.22  | 0.18  | 0.23 | 0.18  | 0.08  |
| Er                   | 3.57  | 3.70  | 0.62  | 0.39  | 0.53  | 0.57  | 0.52  | 0.59 | 0.49  | 0.25  |
| Tm                   | 0.55  | 0.59  | 0.09  | 0.05  | 0.08  | 0.08  | 0.09  | 0.09 | 0.06  | 0.05  |
| Yb                   | 3.41  | 3.47  | 0.60  | 0.33  | 0.53  | 0.52  | 0.62  | 0.58 | 0.40  | 0.38  |
| Lu                   | 0.51  | 0.50  | 0.10  | 0.06  | 0.08  | 0.08  | 0.09  | 0.09 | 0.05  | 0.07  |
| Hf                   | 6.64  | 6.92  | 2.48  | 2.18  | 2.86  | 2.31  | 3.06  | 2.65 | 2.46  | 3.06  |
| Ta                   | 1.26  | 1.17  | 0.24  | 0.05  | 0.21  | 0.22  | 0.25  | 0.79 | 0.30  | 0.40  |
| Pb                   | 11.3  | 14.7  | 21.4  | 14.2  | 10.5  | 16.2  | 7.2   | 12.5 | 8.4   | 12.0  |
| Th                   | 6.72  | 6.85  | 2.85  | 4.24  | 2.61  | 4.04  | 1.23  | 1.59 | 1.96  | 4.03  |
| U                    | 1.88  | 1.89  | 1.16  | 0.64  | 0.85  | 0.96  | 0.36  | 0.67 | 0.49  | 0.48  |
| Eu/Eu*               | 1.01  | 1.02  | 0.87  | 1.82  | 0.85  | 0.94  | 1.46  | 1.21 | 1.02  | 1.81  |
| Sr/Y                 | 5.8   | 5.6   | 120.9 | 189.0 | 90.0  | 81.1  | 115.0 | 75.5 | 96.3  | 223.5 |
| (La/Yb) <sub>N</sub> | 4.4   | 4.5   | 11.6  | 34.0  | 10.9  | 15.1  | 7.6   | 5.7  | 14.9  | 33.7  |

LOI = loss of ignition, Mg# =  $100 \times \text{Mg} / (\text{Mg} + \sum \text{Fe})$  in atomic ratio. The La and Yb contents of chondrite used to calculate (La/Yb)<sub>N</sub> are from Sun and McDonough (1989).

## References

Sun, S.S., and McDonough, W.F., 1989, Chemical and isotopic systematics of oceanic basalts: implications for mantle composition and processes, in Saunders, A.D., and Norry, M.J., eds., *Magmatism in the Ocean Basins*: Geological Society, London, Special Publication 42, p. 313–345, <https://doi.org/10.1144/GSL.SP.1989.042.01.19>.

Table DR8. Sr-Nd isotopic compositions of intrusions from the Xiangride-Kuhai, EKO

| Sample No.                                                                  | Rb(ppm) | Sr(ppm) | $^{87}\text{Rb}/^{86}\text{Sr}$ | $^{87}\text{Sr}/^{86}\text{Sr}$ | $2\sigma$ | $(^{87}\text{Sr}/^{86}\text{Sr})_i$ | Sm(ppm) | Nd(ppm) | $^{147}\text{Sm}/^{144}\text{Nd}$ | $^{143}\text{Nd}/^{144}\text{Nd}$ | $2\sigma$ | $\epsilon_{\text{Nd}}(t)$ | $T_{\text{DM}}(\text{Nd})$<br>(Ma) | $T_{2\text{DM}}(\text{Nd})$<br>(Ma) |
|-----------------------------------------------------------------------------|---------|---------|---------------------------------|---------------------------------|-----------|-------------------------------------|---------|---------|-----------------------------------|-----------------------------------|-----------|---------------------------|------------------------------------|-------------------------------------|
| Qurelong Monzodiorite from the South Kunlun Belt                            |         |         |                                 |                                 |           |                                     |         |         |                                   |                                   |           |                           |                                    |                                     |
| B1301-1                                                                     | 56      | 950     | 0.1709                          | 0.707882                        | 0.000006  | 0.706738                            | 9.57    | 50.30   | 0.1150                            | 0.512238                          | 0.000003  | -2.9                      | 1406                               | 1435                                |
| B1303-1                                                                     | 65      | 840     | 0.2229                          | 0.708046                        | 0.000005  | 0.706554                            | 9.68    | 48.80   | 0.1199                            | 0.512258                          | 0.000003  | -2.8                      | 1447                               | 1428                                |
| B1308-1                                                                     | 87      | 800     | 0.3132                          | 0.708905                        | 0.000006  | 0.706808                            | 7.34    | 38.80   | 0.1144                            | 0.512218                          | 0.000003  | -3.2                      | 1427                               | 1464                                |
| B1309-1                                                                     | 107     | 695     | 0.4455                          | 0.709615                        | 0.000005  | 0.706632                            | 6.86    | 35.00   | 0.1185                            | 0.512241                          | 0.000003  | -3.1                      | 1453                               | 1448                                |
| B1311-1                                                                     | 55      | 906     | 0.1750                          | 0.708855                        | 0.000005  | 0.707683                            | 8.02    | 43.30   | 0.1120                            | 0.512239                          | 0.000003  | -2.7                      | 1363                               | 1419                                |
| B1312-1                                                                     | 60      | 942     | 0.1837                          | 0.707843                        | 0.000006  | 0.706613                            | 9.08    | 48.90   | 0.1122                            | 0.512248                          | 0.000006  | -2.5                      | 1353                               | 1406                                |
| Kengdenongshe Intrusion from the Central Kunlun Belt                        |         |         |                                 |                                 |           |                                     |         |         |                                   |                                   |           |                           |                                    |                                     |
| B8139-2                                                                     | 144     | 128     | 3.2617                          | 0.729190                        | 0.000070  | 0.708467                            | 3.55    | 23.20   | 0.0925                            | 0.512109                          | 0.000005  | -4.4                      | 1308                               | 1536                                |
| B8142-1                                                                     | 145     | 112     | 3.7543                          | 0.731080                        | 0.000020  | 0.707228                            | 3.40    | 23.40   | 0.0878                            | 0.512099                          | 0.000007  | -4.3                      | 1271                               | 1531                                |
| B8142-2                                                                     | 178     | 413     | 1.2485                          | 0.720570                        | 0.000030  | 0.712638                            | 6.40    | 43.50   | 0.0889                            | 0.512075                          | 0.000007  | -4.8                      | 1312                               | 1574                                |
| B8155-1                                                                     | 266     | 221     | 2.7549                          | 0.725150                        | 0.000030  | 0.707648                            | 7.32    | 37.80   | 0.1171                            | 0.512191                          | 0.000003  | -4.2                      | 1510                               | 1520                                |
| Biotite monzogranite from the Walega Intrusive Complex, Central Kunlun Belt |         |         |                                 |                                 |           |                                     |         |         |                                   |                                   |           |                           |                                    |                                     |
| B1107-1                                                                     | 118     | 1170    | 0.2919                          | 0.710373                        | 0.000005  | 0.708544                            | 1.81    | 7.66    | 0.1428                            | 0.512215                          | 0.000020  | -5.2                      | 2004                               | 1600                                |
| B1108-1                                                                     | 354     | 813     | 1.2609                          | 0.717002                        | 0.000006  | 0.709099                            | 16.50   | 98.10   | 0.1017                            | 0.512145                          | 0.000002  | -4.3                      | 1365                               | 1522                                |
| B1114-1                                                                     | 501     | 474     | 3.0646                          | 0.729641                        | 0.000006  | 0.710433                            | 16.20   | 100.00  | 0.0979                            | 0.511967                          | 0.000003  | -7.5                      | 1554                               | 1787                                |
| B1115-1                                                                     | 393     | 450     | 2.5307                          | 0.723629                        | 0.000017  | 0.707768                            | 13.10   | 67.20   | 0.1178                            | 0.512093                          | 0.000007  | -6.2                      | 1677                               | 1679                                |
| B1118-1                                                                     | 365     | 804     | 1.3147                          | 0.716984                        | 0.000005  | 0.708744                            | 18.20   | 108.00  | 0.1019                            | 0.512108                          | 0.000004  | -5.0                      | 1419                               | 1583                                |
| Quartz diorite from the Walega Intrusive Complex, Central Kunlun Belt       |         |         |                                 |                                 |           |                                     |         |         |                                   |                                   |           |                           |                                    |                                     |
| B60003-2                                                                    | 104     | 545     | 0.5524                          | 0.712282                        | 0.000007  | 0.708899                            | 13.30   | 77.70   | 0.1035                            | 0.512147                          | 0.000003  | -4.5                      | 1385                               | 1529                                |
| B70002-2-1                                                                  | 91      | 301     | 0.8779                          | 0.711823                        | 0.000007  | 0.706446                            | 10.60   | 49.20   | 0.1302                            | 0.512538                          | 0.000008  | 1.7                       | 1117                               | 1030                                |
| B70801-1                                                                    | 67      | 209     | 0.9264                          | 0.711104                        | 0.000004  | 0.705430                            | 6.42    | 24.70   | 0.1571                            | 0.512533                          | 0.000011  | 0.1                       | 1659                               | 1158                                |
| B70801-2                                                                    | 64      | 209     | 0.8835                          | 0.710959                        | 0.000008  | 0.705548                            | 5.98    | 23.40   | 0.1545                            | 0.512511                          | 0.000003  | -0.2                      | 1641                               | 1180                                |
| B70801-3                                                                    | 67      | 210     | 0.9234                          | 0.711073                        | 0.000010  | 0.705418                            | 6.41    | 24.60   | 0.1575                            | 0.512521                          | 0.000006  | -0.1                      | 1702                               | 1178                                |



Langmuri Intrusion from the Central Kunlun Belt

|       |    |     |        |          |          |          |      |       |        |          |          |      |      |      |
|-------|----|-----|--------|----------|----------|----------|------|-------|--------|----------|----------|------|------|------|
| CY140 | 43 | 778 | 0.1605 | 0.706692 | 0.000005 | 0.705760 | 2.72 | 11.43 | 0.1436 | 0.512544 | 0.000003 | 0.9  | 1317 | 1074 |
| CY145 | 43 | 532 | 0.2317 | 0.708975 | 0.000008 | 0.707629 | 2.55 | 11.54 | 0.1335 | 0.512310 | 0.000007 | -3.1 | 1594 | 1402 |
| CY147 | 20 | 553 | 0.1053 | 0.706027 | 0.000006 | 0.705415 | 2.27 | 9.72  | 0.1409 | 0.512442 | 0.000004 | -0.9 | 1479 | 1224 |
| CL290 | 45 | 614 | 0.2101 | 0.706470 | 0.000004 | 0.705249 | 1.46 | 6.35  | 0.1391 | 0.512452 | 0.000002 | -0.6 | 1424 | 1201 |
| CL293 | 45 | 506 | 0.2551 | 0.706867 | 0.000005 | 0.705385 | 1.97 | 8.90  | 0.1340 | 0.512458 | 0.000004 | -0.2 | 1322 | 1170 |
| CL296 | 65 | 533 | 0.3530 | 0.710368 | 0.000009 | 0.708317 | 2.07 | 14.33 | 0.0873 | 0.512078 | 0.000006 | -5.2 | 1292 | 1574 |

$(^{87}\text{Sr}/^{86}\text{Sr})_i$  and  $\varepsilon_{\text{Nd}}(t)$  values of intrusions are calculated based on their ages and present-day  $(^{147}\text{Sm}/^{144}\text{Nd})_{\text{CHUR}} = 0.1967$  and  $(^{143}\text{Nd}/^{144}\text{Nd})_{\text{CHUR}} = 0.512638$ .  $T_{2\text{DM}}$  values are calculated based on present-day  $(^{147}\text{Sm}/^{144}\text{Nd})_{\text{DM}} = 0.2137$  and  $(^{143}\text{Nd}/^{144}\text{Nd})_{\text{DM}} = 0.51315$ .  $\lambda_{\text{Rb}} = 1.42 \times 10^{-11} \text{ year}^{-1}$  (Steiger and Jäger, 1977),  $\lambda_{\text{Sm}} = 6.54 \times 10^{-12} \text{ year}^{-1}$  (Lugmair and Marti, 1978).

## References

- Lugmair, G.W., and Marti, K., 1978, Lunar initial  $^{134}\text{Nd}/^{144}\text{Nd}$ : differential evolution of the lunar crust and mantle: *Earth and Planetary Science Letters*, v. 39, no. 3, p. 349–357, [https://doi.org/10.1016/0012-821X\(78\)90021-3](https://doi.org/10.1016/0012-821X(78)90021-3).
- Steiger, R.H., and Jäger, E., 1977, Subcommittee on geochronology: convention on the use of decay constants in geo- and cosmochemistry: *Earth and Planetary Science Letters*, v. 36, no. 3, p. 359–362, [https://doi.org/10.1016/0012-821X\(77\)90060-7](https://doi.org/10.1016/0012-821X(77)90060-7).

Table S9. Hf isotopic compositions of intrusions from the Xiangride-Kuhai, EKO

| Spot No.                                                       | Age<br>(Ma) | $^{176}\text{Yb}/^{177}\text{Hf}$ | 1 $\sigma$ | $^{176}\text{Lu}/^{177}\text{Hf}$ | 1 $\sigma$ | $^{176}\text{Hf}/^{177}\text{Hf}$ | 1 $\sigma$ | $\epsilon_{\text{Hf}}(0)$ | $\epsilon_{\text{Hf}}(t)$ | $T_{\text{DM}}(\text{Hf})$ | $T_{2\text{DM}}(\text{Hf})$ | $f_{\text{Lu/Hf}}$ |
|----------------------------------------------------------------|-------------|-----------------------------------|------------|-----------------------------------|------------|-----------------------------------|------------|---------------------------|---------------------------|----------------------------|-----------------------------|--------------------|
| Qurelong Monzodiorite from the South Kunlun Belt (B1301-1)     |             |                                   |            |                                   |            |                                   |            |                           |                           |                            |                             |                    |
| B1301-1-1                                                      | 470         | 0.017924                          | 0.000076   | 0.000645                          | 0.000004   | 0.282500                          | 0.000020   | -9.6                      | 0.5                       | 1053                       | 1291                        | -0.98              |
| B1301-1-2                                                      | 470         | 0.015738                          | 0.000396   | 0.000550                          | 0.000011   | 0.282521                          | 0.000023   | -8.9                      | 1.3                       | 1022                       | 1249                        | -0.98              |
| B1301-1-3                                                      | 470         | 0.016401                          | 0.000048   | 0.000582                          | 0.000002   | 0.282498                          | 0.000020   | -9.7                      | 0.5                       | 1055                       | 1294                        | -0.98              |
| B1301-1-4                                                      | 470         | 0.031909                          | 0.000139   | 0.001126                          | 0.000005   | 0.282535                          | 0.000021   | -8.4                      | 1.6                       | 1018                       | 1232                        | -0.98              |
| B1301-1-5                                                      | 470         | 0.022144                          | 0.001052   | 0.000758                          | 0.000026   | 0.282512                          | 0.000023   | -9.2                      | 0.9                       | 1040                       | 1270                        | -0.98              |
| B1301-1-6                                                      | 470         | 0.016443                          | 0.000248   | 0.000568                          | 0.000005   | 0.282502                          | 0.000023   | -9.5                      | 0.6                       | 1049                       | 1287                        | -0.98              |
| B1301-1-7                                                      | 470         | 0.019592                          | 0.000035   | 0.000628                          | 0.000004   | 0.282491                          | 0.000028   | -9.9                      | 0.2                       | 1065                       | 1309                        | -0.98              |
| B1301-1-8                                                      | 470         | 0.016275                          | 0.000450   | 0.000534                          | 0.000012   | 0.282524                          | 0.000022   | -8.8                      | 1.4                       | 1017                       | 1243                        | -0.98              |
| B1301-1-9                                                      | 470         | 0.014655                          | 0.000298   | 0.000503                          | 0.000006   | 0.282514                          | 0.000020   | -9.1                      | 1.1                       | 1030                       | 1261                        | -0.98              |
| B1301-1-10                                                     | 470         | 0.024948                          | 0.000249   | 0.000890                          | 0.000013   | 0.282519                          | 0.000019   | -8.9                      | 1.1                       | 1033                       | 1258                        | -0.98              |
| B1301-1-11                                                     | 470         | 0.033417                          | 0.000679   | 0.001089                          | 0.000011   | 0.282516                          | 0.000026   | -9.0                      | 1.0                       | 1043                       | 1268                        | -0.98              |
| B1301-1-12                                                     | 470         | 0.020823                          | 0.000342   | 0.000732                          | 0.000010   | 0.282513                          | 0.000022   | -9.2                      | 1.0                       | 1038                       | 1267                        | -0.98              |
| B1301-1-13                                                     | 470         | 0.033687                          | 0.000935   | 0.001041                          | 0.000021   | 0.282517                          | 0.000024   | -9.0                      | 1.0                       | 1041                       | 1266                        | -0.98              |
| B1301-1-14                                                     | 470         | 0.022273                          | 0.000475   | 0.000732                          | 0.000009   | 0.282523                          | 0.000022   | -8.8                      | 1.3                       | 1024                       | 1248                        | -0.98              |
| B1301-1-15                                                     | 470         | 0.012183                          | 0.000069   | 0.000439                          | 0.000004   | 0.282503                          | 0.000020   | -9.5                      | 0.7                       | 1043                       | 1282                        | -0.98              |
| B1301-1-16                                                     | 470         | 0.020929                          | 0.000109   | 0.000747                          | 0.000007   | 0.282504                          | 0.000019   | -9.5                      | 0.6                       | 1051                       | 1286                        | -0.98              |
| B1301-1-17                                                     | 470         | 0.020888                          | 0.000326   | 0.000702                          | 0.000009   | 0.282511                          | 0.000023   | -9.2                      | 0.9                       | 1040                       | 1271                        | -0.98              |
| B1301-1-18                                                     | 470         | 0.022268                          | 0.000397   | 0.000740                          | 0.000010   | 0.282512                          | 0.000021   | -9.2                      | 0.9                       | 1040                       | 1270                        | -0.98              |
| B1301-1-19                                                     | 470         | 0.021819                          | 0.000094   | 0.000762                          | 0.000006   | 0.282535                          | 0.000023   | -8.4                      | 1.7                       | 1008                       | 1225                        | -0.98              |
| Kengdenongshe Intrusion from the Central Kunlun Belt (B8142-3) |             |                                   |            |                                   |            |                                   |            |                           |                           |                            |                             |                    |
| B8142-3-1                                                      | 446         | 0.033441                          | 0.000736   | 0.001398                          | 0.000033   | 0.282436                          | 0.000028   | -11.9                     | -2.5                      | 1165                       | 1438                        | -0.96              |
| B8142-3-2                                                      | 446         | 0.044004                          | 0.002122   | 0.001915                          | 0.000080   | 0.282549                          | 0.000038   | -7.9                      | 1.4                       | 1020                       | 1227                        | -0.94              |
| B8142-3-3                                                      | 446         | 0.038607                          | 0.000744   | 0.001623                          | 0.000038   | 0.282448                          | 0.000022   | -11.5                     | -2.1                      | 1156                       | 1420                        | -0.95              |
| B8142-3-4                                                      | 446         | 0.015391                          | 0.000278   | 0.000536                          | 0.000014   | 0.282496                          | 0.000023   | -9.8                      | -0.1                      | 1056                       | 1307                        | -0.98              |

|                                                                                     |     |          |          |          |          |          |          |       |      |      |      |       |
|-------------------------------------------------------------------------------------|-----|----------|----------|----------|----------|----------|----------|-------|------|------|------|-------|
| B8142-3-5                                                                           | 446 | 0.033203 | 0.001106 | 0.001571 | 0.000036 | 0.282457 | 0.000033 | -11.1 | -1.8 | 1141 | 1401 | -0.95 |
| B8142-3-6                                                                           | 446 | 0.040909 | 0.000611 | 0.001763 | 0.000043 | 0.282487 | 0.000036 | -10.1 | -0.8 | 1104 | 1345 | -0.95 |
| B8142-3-7                                                                           | 446 | 0.035986 | 0.001018 | 0.001570 | 0.000061 | 0.282426 | 0.000026 | -12.2 | -2.9 | 1186 | 1462 | -0.95 |
| B8142-3-8                                                                           | 446 | 0.020942 | 0.000626 | 0.000909 | 0.000032 | 0.282355 | 0.000022 | -14.7 | -5.2 | 1263 | 1588 | -0.97 |
| B8142-3-9                                                                           | 446 | 0.050221 | 0.000651 | 0.001816 | 0.000019 | 0.282370 | 0.000022 | -14.2 | -5.0 | 1274 | 1575 | -0.95 |
| B8142-3-10                                                                          | 446 | 0.037436 | 0.000859 | 0.001623 | 0.000028 | 0.282463 | 0.000036 | -10.9 | -1.6 | 1134 | 1389 | -0.95 |
| B8142-3-11                                                                          | 446 | 0.024265 | 0.000578 | 0.001245 | 0.000034 | 0.282503 | 0.000019 | -9.5  | -0.1 | 1066 | 1305 | -0.96 |
| B8142-3-12                                                                          | 446 | 0.046704 | 0.001539 | 0.002131 | 0.000067 | 0.282492 | 0.000025 | -9.9  | -0.7 | 1108 | 1341 | -0.94 |
| B8142-3-13                                                                          | 446 | 0.049607 | 0.001513 | 0.002078 | 0.000057 | 0.282529 | 0.000033 | -8.6  | 0.6  | 1053 | 1269 | -0.94 |
| B8142-3-14                                                                          | 446 | 0.003892 | 0.000218 | 0.000141 | 0.000009 | 0.282377 | 0.000025 | -14.0 | -4.2 | 1208 | 1533 | -1.00 |
| B8142-3-15                                                                          | 446 | 0.029865 | 0.000520 | 0.001252 | 0.000026 | 0.282508 | 0.000017 | -9.3  | 0.1  | 1060 | 1296 | -0.96 |
| B8142-3-16                                                                          | 446 | 0.030867 | 0.000874 | 0.001369 | 0.000039 | 0.282482 | 0.000024 | -10.3 | -0.9 | 1100 | 1349 | -0.96 |
| B8142-3-18                                                                          | 446 | 0.031434 | 0.000514 | 0.001410 | 0.000028 | 0.282429 | 0.000023 | -12.1 | -2.7 | 1175 | 1452 | -0.96 |
| B8142-3-19                                                                          | 446 | 0.039003 | 0.000912 | 0.001630 | 0.000049 | 0.282480 | 0.000022 | -10.3 | -1.0 | 1110 | 1356 | -0.95 |
| B8142-3-20                                                                          | 446 | 0.045385 | 0.000804 | 0.001827 | 0.000037 | 0.282434 | 0.000022 | -12.0 | -2.7 | 1182 | 1451 | -0.94 |
| Biotite monzogranite from the Walega Intrusive Complex, Central Kunlun Belt (B1107) |     |          |          |          |          |          |          |       |      |      |      |       |
| B1107-1                                                                             | 440 | 0.030578 | 0.000487 | 0.001124 | 0.000017 | 0.282776 | 0.000023 | 0.1   | 9.5  | 677  | 769  | -0.97 |
| B1107-2                                                                             | 440 | 0.019701 | 0.000393 | 0.000706 | 0.000014 | 0.282653 | 0.000017 | -4.2  | 5.3  | 841  | 1004 | -0.98 |
| B1107-3                                                                             | 440 | 0.021153 | 0.000580 | 0.000784 | 0.000020 | 0.282299 | 0.000030 | -16.7 | -7.3 | 1337 | 1699 | -0.98 |
| B1107-4                                                                             | 440 | 0.034769 | 0.000569 | 0.001261 | 0.000018 | 0.282379 | 0.000020 | -13.9 | -4.6 | 1242 | 1551 | -0.96 |
| B1107-5                                                                             | 440 | 0.023390 | 0.000457 | 0.000914 | 0.000020 | 0.282427 | 0.000019 | -12.2 | -2.8 | 1164 | 1452 | -0.97 |
| B1107-6                                                                             | 440 | 0.012269 | 0.000249 | 0.000439 | 0.000010 | 0.282318 | 0.000015 | -16.0 | -6.5 | 1298 | 1655 | -0.99 |
| B1107-7                                                                             | 440 | 0.018226 | 0.000281 | 0.000723 | 0.000008 | 0.282751 | 0.000021 | -0.7  | 8.7  | 705  | 812  | -0.98 |
| B1107-8                                                                             | 440 | 0.020747 | 0.000185 | 0.000772 | 0.000008 | 0.282454 | 0.000017 | -11.3 | -1.8 | 1122 | 1397 | -0.98 |
| B1107-9                                                                             | 440 | 0.025393 | 0.000473 | 0.000996 | 0.000027 | 0.282421 | 0.000020 | -12.4 | -3.0 | 1174 | 1463 | -0.97 |
| B1107-10                                                                            | 440 | 0.024146 | 0.000337 | 0.000963 | 0.000011 | 0.282686 | 0.000033 | -3.0  | 6.4  | 801  | 944  | -0.97 |
| B1107-11                                                                            | 440 | 0.016525 | 0.000452 | 0.000640 | 0.000021 | 0.282655 | 0.000019 | -4.1  | 5.4  | 838  | 1000 | -0.98 |
| B1107-12                                                                            | 440 | 0.030978 | 0.000913 | 0.001138 | 0.000037 | 0.282694 | 0.000018 | -2.8  | 6.6  | 794  | 931  | -0.97 |
| B1107-13                                                                            | 440 | 0.028121 | 0.000871 | 0.001059 | 0.000030 | 0.282334 | 0.000026 | -15.5 | -6.1 | 1299 | 1636 | -0.97 |

|          |     |          |          |          |          |          |          |       |      |      |      |       |
|----------|-----|----------|----------|----------|----------|----------|----------|-------|------|------|------|-------|
| B1107-14 | 440 | 0.031351 | 0.000132 | 0.001219 | 0.000006 | 0.282507 | 0.000015 | -9.4  | 0.0  | 1060 | 1299 | -0.96 |
| B1107-15 | 440 | 0.036795 | 0.000748 | 0.001373 | 0.000028 | 0.282716 | 0.000032 | -2.0  | 7.3  | 767  | 891  | -0.96 |
| B1107-16 | 440 | 0.028398 | 0.000824 | 0.001068 | 0.000032 | 0.282315 | 0.000019 | -16.2 | -6.8 | 1325 | 1672 | -0.97 |
| B1107-17 | 440 | 0.025159 | 0.000497 | 0.000949 | 0.000019 | 0.282524 | 0.000021 | -8.8  | 0.6  | 1028 | 1262 | -0.97 |
| B1107-18 | 440 | 0.004382 | 0.000430 | 0.000160 | 0.000016 | 0.282417 | 0.000016 | -12.6 | -2.9 | 1155 | 1459 | -1.00 |
| B1107-19 | 440 | 0.009521 | 0.000082 | 0.000425 | 0.000004 | 0.282563 | 0.000016 | -7.4  | 2.2  | 961  | 1178 | -0.99 |
| B1107-20 | 440 | 0.026736 | 0.000243 | 0.001028 | 0.000010 | 0.282735 | 0.000020 | -1.3  | 8.1  | 733  | 849  | -0.97 |

---

Quartz diorite from the Walega Intrusive Complex, Central Kunlun Belt (B70002-2)

|             |     |          |          |          |          |          |          |      |      |     |     |       |
|-------------|-----|----------|----------|----------|----------|----------|----------|------|------|-----|-----|-------|
| B70002-2-1  | 430 | 0.114144 | 0.004007 | 0.003704 | 0.000110 | 0.282798 | 0.000030 | 0.9  | 9.3  | 694 | 771 | -0.89 |
| B70002-2-2  | 430 | 0.106707 | 0.006038 | 0.003569 | 0.000177 | 0.282724 | 0.000033 | -1.7 | 6.8  | 802 | 914 | -0.89 |
| B70002-2-3  | 430 | 0.118166 | 0.003441 | 0.003736 | 0.000095 | 0.282785 | 0.000028 | 0.4  | 8.9  | 714 | 798 | -0.89 |
| B70002-2-4  | 430 | 0.076263 | 0.008125 | 0.002592 | 0.000235 | 0.282805 | 0.000031 | 1.2  | 9.9  | 661 | 739 | -0.92 |
| B70002-2-5  | 430 | 0.130218 | 0.003332 | 0.004135 | 0.000106 | 0.282806 | 0.000031 | 1.2  | 9.5  | 690 | 762 | -0.88 |
| B70002-2-6  | 430 | 0.109194 | 0.002276 | 0.003441 | 0.000054 | 0.282753 | 0.000029 | -0.7 | 7.8  | 757 | 856 | -0.90 |
| B70002-2-7  | 430 | 0.044811 | 0.003276 | 0.001539 | 0.000112 | 0.282727 | 0.000022 | -1.6 | 7.5  | 754 | 876 | -0.95 |
| B70002-2-8  | 430 | 0.121583 | 0.004908 | 0.004252 | 0.000182 | 0.282830 | 0.000034 | 2.1  | 10.3 | 654 | 716 | -0.87 |
| B70002-2-9  | 430 | 0.138229 | 0.002464 | 0.004866 | 0.000058 | 0.282793 | 0.000040 | 0.7  | 8.8  | 725 | 799 | -0.85 |
| B70002-2-10 | 430 | 0.040336 | 0.004765 | 0.001455 | 0.000167 | 0.282713 | 0.000024 | -2.1 | 7.0  | 773 | 902 | -0.96 |
| B70002-2-11 | 430 | 0.067378 | 0.004887 | 0.002253 | 0.000165 | 0.282775 | 0.000027 | 0.1  | 8.9  | 699 | 793 | -0.93 |
| B70002-2-12 | 430 | 0.069558 | 0.002934 | 0.002433 | 0.000103 | 0.282791 | 0.000028 | 0.7  | 9.5  | 679 | 764 | -0.93 |
| B70002-2-13 | 430 | 0.120962 | 0.005451 | 0.004128 | 0.000207 | 0.282789 | 0.000041 | 0.6  | 8.9  | 715 | 794 | -0.88 |
| B70002-2-14 | 430 | 0.092513 | 0.009301 | 0.003039 | 0.000314 | 0.282760 | 0.000041 | -0.4 | 8.2  | 737 | 835 | -0.91 |
| B70002-2-15 | 430 | 0.076953 | 0.001576 | 0.002582 | 0.000073 | 0.282723 | 0.000033 | -1.7 | 7.0  | 783 | 901 | -0.92 |
| B70002-2-16 | 430 | 0.083661 | 0.005931 | 0.002676 | 0.000156 | 0.282817 | 0.000032 | 1.6  | 10.3 | 645 | 716 | -0.92 |
| B70002-2-17 | 430 | 0.089260 | 0.007887 | 0.003044 | 0.000276 | 0.282767 | 0.000040 | -0.2 | 8.4  | 727 | 822 | -0.91 |
| B70002-2-18 | 430 | 0.068896 | 0.004009 | 0.002344 | 0.000135 | 0.282736 | 0.000031 | -1.3 | 7.5  | 758 | 871 | -0.93 |
| B70002-2-19 | 430 | 0.092713 | 0.004700 | 0.003099 | 0.000151 | 0.282772 | 0.000032 | 0.0  | 8.6  | 721 | 813 | -0.91 |

---

Langmuri Intrusion from the Central Kunlun Belt (CL290)

|          |     |          |          |          |          |          |          |      |      |     |      |       |
|----------|-----|----------|----------|----------|----------|----------|----------|------|------|-----|------|-------|
| CL290-01 | 408 | 0.019224 | 0.000575 | 0.000549 | 0.000015 | 0.282539 | 0.000009 | -8.2 | 0.6  | 997 | 1239 | -0.98 |
| CL290-02 | 408 | 0.031558 | 0.000386 | 0.000908 | 0.000013 | 0.282813 | 0.000007 | 1.4  | 10.2 | 621 | 705  | -0.97 |
| CL290-03 | 408 | 0.042254 | 0.000121 | 0.001201 | 0.000005 | 0.282820 | 0.000008 | 1.7  | 10.4 | 616 | 696  | -0.96 |
| CL290-04 | 408 | 0.036525 | 0.000441 | 0.001044 | 0.000008 | 0.282807 | 0.000008 | 1.2  | 9.9  | 631 | 719  | -0.97 |
| CL290-05 | 408 | 0.007691 | 0.000695 | 0.000225 | 0.000019 | 0.282679 | 0.000011 | -3.3 | 5.6  | 795 | 959  | -0.99 |
| CL290-06 | 408 | 0.035057 | 0.000752 | 0.001013 | 0.000022 | 0.282798 | 0.000008 | 0.9  | 9.6  | 644 | 737  | -0.97 |
| CL290-07 | 408 | 0.042371 | 0.000903 | 0.001198 | 0.000021 | 0.282806 | 0.000010 | 1.2  | 9.9  | 635 | 724  | -0.96 |
| CL290-08 | 408 | 0.045745 | 0.000609 | 0.001309 | 0.000020 | 0.282797 | 0.000008 | 0.9  | 9.5  | 650 | 743  | -0.96 |
| CL290-09 | 408 | 0.041352 | 0.000329 | 0.001169 | 0.000008 | 0.282795 | 0.000008 | 0.8  | 9.5  | 651 | 745  | -0.96 |
| CL290-10 | 408 | 0.036829 | 0.000547 | 0.001072 | 0.000014 | 0.282814 | 0.000008 | 1.5  | 10.2 | 622 | 706  | -0.97 |
| CL290-11 | 408 | 0.048608 | 0.000459 | 0.001399 | 0.000013 | 0.282842 | 0.000010 | 2.5  | 11.1 | 587 | 656  | -0.96 |
| CL290-12 | 408 | 0.036520 | 0.000318 | 0.001073 | 0.000008 | 0.282832 | 0.000017 | 2.1  | 10.8 | 596 | 670  | -0.97 |
| CL290-13 | 408 | 0.035344 | 0.001180 | 0.001020 | 0.000041 | 0.282809 | 0.000010 | 1.3  | 10.0 | 628 | 715  | -0.97 |
| CL290-14 | 408 | 0.025804 | 0.001017 | 0.000757 | 0.000033 | 0.282543 | 0.000015 | -8.1 | 0.7  | 997 | 1234 | -0.98 |
| CL290-15 | 408 | 0.042128 | 0.000169 | 0.001227 | 0.000004 | 0.282817 | 0.000009 | 1.6  | 10.2 | 620 | 702  | -0.96 |
| CL290-16 | 408 | 0.030443 | 0.000794 | 0.000888 | 0.000018 | 0.282818 | 0.000009 | 1.6  | 10.4 | 613 | 695  | -0.97 |
| CL290-17 | 408 | 0.037770 | 0.000154 | 0.001074 | 0.000003 | 0.282799 | 0.000008 | 1.0  | 9.7  | 643 | 736  | -0.97 |
| CL290-18 | 408 | 0.043846 | 0.000457 | 0.001255 | 0.000010 | 0.282825 | 0.000009 | 1.9  | 10.5 | 609 | 687  | -0.96 |
| CL290-19 | 408 | 0.043507 | 0.000372 | 0.001266 | 0.000006 | 0.282831 | 0.000009 | 2.1  | 10.7 | 601 | 675  | -0.96 |
| CL290-20 | 408 | 0.045028 | 0.000316 | 0.001297 | 0.000007 | 0.282805 | 0.000009 | 1.2  | 9.8  | 639 | 727  | -0.96 |
| CL290-21 | 408 | 0.032291 | 0.001480 | 0.000927 | 0.000044 | 0.282613 | 0.000013 | -5.6 | 3.1  | 903 | 1100 | -0.97 |
| CL290-22 | 408 | 0.036031 | 0.000351 | 0.001031 | 0.000016 | 0.282800 | 0.000009 | 1.0  | 9.7  | 641 | 733  | -0.97 |
| CL290-23 | 408 | 0.043583 | 0.000290 | 0.001227 | 0.000010 | 0.282800 | 0.000008 | 1.0  | 9.6  | 645 | 736  | -0.96 |
| CL290-24 | 408 | 0.044460 | 0.000356 | 0.001273 | 0.000009 | 0.282823 | 0.000011 | 1.8  | 10.4 | 613 | 691  | -0.96 |
| CL290-25 | 408 | 0.049682 | 0.000707 | 0.001356 | 0.000014 | 0.282821 | 0.000010 | 1.7  | 10.4 | 617 | 696  | -0.96 |

The parameter used in our calculations:  $(^{176}\text{Hf}/^{177}\text{Hf})_{\text{CHUR}} = 0.282772$ ,  $(^{176}\text{Lu}/^{177}\text{Hf})_{\text{CHUR}} = 0.0332$  (Blichert-Toft and Albarède, 1997);  $(^{176}\text{Hf}/^{177}\text{Hf})_{\text{DM}} = 0.28325$ ,  $(^{176}\text{Lu}/^{177}\text{Hf})_{\text{DM}} = 0.0384$  (Griffin et al., 2000);  $\lambda(^{176}\text{Lu}) = 1.867 \times 10^{-11} \text{ a}^{-1}$  (Söderlund et al., 2004).

## References

- Blichert-Toft, J., and Albarède, F., 1997, The Lu-Hf isotope geochemistry of chondrites and the evolution of the mantle-crust system: *Earth and Planetary Science Letters*, v. 148, no. 1-2, p. 243–258, [https://doi.org/10.1016/S0012-821X\(97\)00040-X](https://doi.org/10.1016/S0012-821X(97)00040-X).
- Griffin, W.L., Pearson, N.J., Belousova, E., Jackson, S.E., van Achterbergh, E., O'Reilly, S.Y., and Shee, S.R., 2000, The Hf isotope composition of cratonic mantle: LAM-MC-ICPMS analysis of zircon megacrysts in kimberlites: *Geochimica Et Cosmochimica Acta*, v. 64, no. 1, p. 133–147, [https://doi.org/10.1016/S0016-7037\(99\)00343-9](https://doi.org/10.1016/S0016-7037(99)00343-9).
- Söderlund, U., Patchett, P.J., Vervoort, J.D., and Isachsen, C.E., 2004, The  $^{176}\text{Lu}$  decay constant determined by Lu–Hf and U–Pb isotope systematics of Precambrian mafic intrusions: *Earth and Planetary Science Letters*, v. 219, no. 3-4, p. 311–324, [https://doi.org/10.1016/S0012-821X\(04\)00012-3](https://doi.org/10.1016/S0012-821X(04)00012-3).
