# Supplementary material
Source: publisher figshare collection journal article supplement (https://gsapubs.figshare.com/articles/dataset/_/21067267)
Supplement: Supplementary file 1 [file 1]

## Sheet: Table S1
Stratigraphic unit	Locality	Rock type	Sample number	Ages						Age used for compliation	Dating method	Reference
				207Pb/206Pb	1σ	207Pb/235U	1σ	206Pb/238U	1σ
Jinshuikou metamorphic complex	Qingshuiquan	Migmatized biotite-plagioclase gneiss	NMH-54-01	667	71.6	557	9	530	7.4	530	LA-ICPMS zircon U-Pb	He, 2016
Jinshuikou metamorphic complex	Qingshuiquan	Migmatized biotite-plagioclase gneiss	NMH-54-02	862	63.3	739	8.3	699	9.3	699	LA-ICPMS zircon U-Pb	He, 2016
Jinshuikou metamorphic complex	Qingshuiquan	Migmatized biotite-plagioclase gneiss	NMH-54-03	879	64	763	8.9	725	9.7	725	LA-ICPMS zircon U-Pb	He, 2016
Jinshuikou metamorphic complex	Qingshuiquan	Migmatized biotite-plagioclase gneiss	NMH-54-04	626	81.5	553	11.8	536	8	536	LA-ICPMS zircon U-Pb	He, 2016
Jinshuikou metamorphic complex	Qingshuiquan	Migmatized biotite-plagioclase gneiss	NMH-54-05	582	74.1	542	9.3	532	7.5	532	LA-ICPMS zircon U-Pb	He, 2016
Jinshuikou metamorphic complex	Qingshuiquan	Migmatized biotite-plagioclase gneiss	NMH-54-06	562	72.8	538	8.8	533	7.5	533	LA-ICPMS zircon U-Pb	He, 2016
Jinshuikou metamorphic complex	Qingshuiquan	Migmatized biotite-plagioclase gneiss	NMH-54-07	383	93.6	500	13.2	526	8.2	526	LA-ICPMS zircon U-Pb	He, 2016
Jinshuikou metamorphic complex	Qingshuiquan	Migmatized biotite-plagioclase gneiss	NMH-54-08	2637	51.5	2515	15.9	2367	30.1	2637	LA-ICPMS zircon U-Pb	He, 2016
Jinshuikou metamorphic complex	Qingshuiquan	Migmatized biotite-plagioclase gneiss	NMH-54-09	526	107	534	17.4	536	9.1	536	LA-ICPMS zircon U-Pb	He, 2016
Jinshuikou metamorphic complex	Qingshuiquan	Migmatized biotite-plagioclase gneiss	NMH-54-10	541	71.7	538	8.2	537	7.5	537	LA-ICPMS zircon U-Pb	He, 2016
Jinshuikou metamorphic complex	Qingshuiquan	Migmatized biotite-plagioclase gneiss	NMH-54-11	1752	66.3	1652	21.1	1576	23.9	1752	LA-ICPMS zircon U-Pb	He, 2016
Jinshuikou metamorphic complex	Qingshuiquan	Migmatized biotite-plagioclase gneiss	NMH-54-12	1269	60.8	1100	11.6	1017	13.7	1269	LA-ICPMS zircon U-Pb	He, 2016
Jinshuikou metamorphic complex	Qingshuiquan	Migmatized biotite-plagioclase gneiss	NMH-54-13	1510	66.2	1344	17.8	1242	18.1	1510	LA-ICPMS zircon U-Pb	He, 2016
Jinshuikou metamorphic complex	Qingshuiquan	Migmatized biotite-plagioclase gneiss	NMH-54-14	1076	101	982	27.8	941	17.6	941	LA-ICPMS zircon U-Pb	He, 2016
Jinshuikou metamorphic complex	Qingshuiquan	Migmatized biotite-plagioclase gneiss	NMH-54-15	619	78	549	10.8	532	7.8	532	LA-ICPMS zircon U-Pb	He, 2016
Jinshuikou metamorphic complex	Qingshuiquan	Migmatized biotite-plagioclase gneiss	NMH-54-16	1019	65.3	988	12.2	975	13.4	975	LA-ICPMS zircon U-Pb	He, 2016
Jinshuikou metamorphic complex	Qingshuiquan	Migmatized biotite-plagioclase gneiss	NMH-54-17	949	80.1	938	18.3	933	14.4	933	LA-ICPMS zircon U-Pb	He, 2016
Jinshuikou metamorphic complex	Qingshuiquan	Migmatized biotite-plagioclase gneiss	NMH-54-18	499	77.8	529	9.8	536	7.7	536	LA-ICPMS zircon U-Pb	He, 2016
Jinshuikou metamorphic complex	Qingshuiquan	Migmatized biotite-plagioclase gneiss	NMH-54-19	1624	60.1	1480	15.2	1381	18.9	1624	LA-ICPMS zircon U-Pb	He, 2016
Jinshuikou metamorphic complex	Qingshuiquan	Migmatized biotite-plagioclase gneiss	NMH-54-20	571	72.9	541	9	533	7.6	533	LA-ICPMS zircon U-Pb	He, 2016
Jinshuikou metamorphic complex	Qingshuiquan	Migmatized biotite-plagioclase gneiss	NMH-54-21	643	71	559	8.9	539	7.6	539	LA-ICPMS zircon U-Pb	He, 2016
Jinshuikou metamorphic complex	Qingshuiquan	Migmatized biotite-plagioclase gneiss	NMH-54-22	700	81.2	569	12.3	536	8.1	536	LA-ICPMS zircon U-Pb	He, 2016
Jinshuikou metamorphic complex	Qingshuiquan	Migmatized biotite-plagioclase gneiss	NMH-54-23	1552	57.3	1471	12.6	1416	18.5	1552	LA-ICPMS zircon U-Pb	He, 2016
Jinshuikou metamorphic complex	Qingshuiquan	Migmatized biotite-plagioclase gneiss	NMH-54-24	1521	60.6	1323	14.2	1205	16.6	1521	LA-ICPMS zircon U-Pb	He, 2016
Jinshuikou metamorphic complex	Qingshuiquan	Migmatized biotite-plagioclase gneiss	NMH-54-25	534	73.8	536	8.9	536	7.7	536	LA-ICPMS zircon U-Pb	He, 2016
Jinshuikou metamorphic complex	Qingshuiquan	Migmatized biotite-plagioclase gneiss	NMH-54-26	1447	61.1	1333	14.2	1262	17.3	1447	LA-ICPMS zircon U-Pb	He, 2016
Jinshuikou metamorphic complex	Qingshuiquan	Migmatized biotite-plagioclase gneiss	NMH-54-27	1100	64.3	1046	12.6	1021	14.1	1100	LA-ICPMS zircon U-Pb	He, 2016
Jinshuikou metamorphic complex	Qingshuiquan	Migmatized biotite-plagioclase gneiss	NMH-54-28	1121	71.1	1007	15.9	955	14.1	955	LA-ICPMS zircon U-Pb	He, 2016
Jinshuikou metamorphic complex	Qingshuiquan	Migmatized biotite-plagioclase gneiss	NMH-54-29	886	67.8	767	11	727	10.3	727	LA-ICPMS zircon U-Pb	He, 2016
Jinshuikou metamorphic complex	Qingshuiquan	Migmatized biotite-plagioclase gneiss	NMH-54-30	1269	60.5	1111	11.7	1032	14	1269	LA-ICPMS zircon U-Pb	He, 2016
Jinshuikou metamorphic complex	Qingshuiquan	Migmatized biotite-plagioclase gneiss	NMH-54-31	1252	73.5	1157	19.2	1106	17.1	1252	LA-ICPMS zircon U-Pb	He, 2016
Jinshuikou metamorphic complex	Qingshuiquan	Migmatized biotite-plagioclase gneiss	NMH-54-32	1339	59.2	1227	11.9	1165	15.6	1339	LA-ICPMS zircon U-Pb	He, 2016
Jinshuikou metamorphic complex	Qingshuiquan	Migmatized biotite-plagioclase gneiss	NMH-54-33	607	73.7	547	9.5	532	7.7	532	LA-ICPMS zircon U-Pb	He, 2016
Jinshuikou metamorphic complex	Qingshuiquan	Migmatized biotite-plagioclase gneiss	NMH-54-34	500	71.7	526	8.1	532	7.5	532	LA-ICPMS zircon U-Pb	He, 2016
Jinshuikou metamorphic complex	Qingshuiquan	Migmatized biotite-plagioclase gneiss	NMH-54-35	740	82.1	574	12.9	532	8.3	532	LA-ICPMS zircon U-Pb	He, 2016
Jinshuikou metamorphic complex	Qingshuiquan	Migmatized biotite-plagioclase gneiss	NMH-54-36	524	82.7	529	11.5	530	8	530	LA-ICPMS zircon U-Pb	He, 2016
Jinshuikou metamorphic complex	Qingshuiquan	Migmatized biotite-plagioclase gneiss	NMH-54-37	1448	68.8	1321	18.9	1243	18.8	1448	LA-ICPMS zircon U-Pb	He, 2016
Jinshuikou metamorphic complex	Qingshuiquan	Migmatized biotite-plagioclase gneiss	NMH-54-38	1188	60.3	1141	11.4	1117	15	1188	LA-ICPMS zircon U-Pb	He, 2016
Jinshuikou metamorphic complex	Qingshuiquan	Migmatized biotite-plagioclase gneiss	NMH-54-39	607	70.6	548	8.6	534	7.7	534	LA-ICPMS zircon U-Pb	He, 2016
Jinshuikou metamorphic complex	Qingshuiquan	Migmatized biotite-plagioclase gneiss	NMH-54-40	557	75.4	537	9.8	533	7.8	533	LA-ICPMS zircon U-Pb	He, 2016
Jinshuikou metamorphic complex	Qingshuiquan	Migmatized biotite-plagioclase gneiss	NMH-54-41	1337	61.4	1221	13.4	1156	16	1337	LA-ICPMS zircon U-Pb	He, 2016
Jinshuikou metamorphic complex	Qingshuiquan	Migmatized biotite-plagioclase gneiss	NMH-54-42	1062	70.8	1020	15.7	999	14.8	999	LA-ICPMS zircon U-Pb	He, 2016
Jinshuikou metamorphic complex	Qingshuiquan	Migmatized biotite-plagioclase gneiss	NMH-54-43	1590	65.4	1507	19.2	1448	21.7	1590	LA-ICPMS zircon U-Pb	He, 2016
Jinshuikou metamorphic complex	Qingshuiquan	Migmatized biotite-plagioclase gneiss	NMH-54-44	708	70.9	571	9.4	537	7.8	537	LA-ICPMS zircon U-Pb	He, 2016
Jinshuikou metamorphic complex	Qingshuiquan	Migmatized biotite-plagioclase gneiss	NMH-54-45	576	66.5	544	7.1	537	7.6	537	LA-ICPMS zircon U-Pb	He, 2016
Jinshuikou metamorphic complex	Qingshuiquan	Migmatized biotite-plagioclase gneiss	NMH-54-46	1225	68.6	1079	16.1	1008	15	1225	LA-ICPMS zircon U-Pb	He, 2016
Jinshuikou metamorphic complex	Qingshuiquan	Migmatized biotite-plagioclase gneiss	NMH-54-47	526	69.3	533	7.9	534	7.6	534	LA-ICPMS zircon U-Pb	He, 2016
Jinshuikou metamorphic complex	Qingshuiquan	Migmatized biotite-plagioclase gneiss	NMH-54-48	572	76.6	543	10.3	536	8	536	LA-ICPMS zircon U-Pb	He, 2016
Jinshuikou metamorphic complex	Qingshuiquan	Migmatized biotite-plagioclase gneiss	NMH-54-49	489	76.7	527	8.8	535	7.8	535	LA-ICPMS zircon U-Pb	He, 2016
Jinshuikou metamorphic complex	Qingshuiquan	Migmatized biotite-plagioclase gneiss	NMH-54-50	922	65	895	11	884	12.4	884	LA-ICPMS zircon U-Pb	He, 2016
Jinshuikou metamorphic complex	Qingshuiquan	Migmatized biotite-plagioclase gneiss	NMH-54-51	581	72.9	542	9.3	533	7.8	533	LA-ICPMS zircon U-Pb	He, 2016
Jinshuikou metamorphic complex	Qingshuiquan	Migmatized biotite-plagioclase gneiss	NMH-54-52	688	76.6	568	11.1	539	8.2	539	LA-ICPMS zircon U-Pb	He, 2016
Jinshuikou metamorphic complex	Qingshuiquan	Migmatized biotite-plagioclase gneiss	NMH-54-53	1222	66.3	1123	15.3	1073	15.7	1222	LA-ICPMS zircon U-Pb	He, 2016
Jinshuikou metamorphic complex	Qingshuiquan	Migmatized biotite-plagioclase gneiss	NMH-54-54	534	71.4	536	8.4	536	7.8	536	LA-ICPMS zircon U-Pb	He, 2016
Jinshuikou metamorphic complex	Qingshuiquan	Migmatized biotite-plagioclase gneiss	NMH-54-55	1089	64.7	1065	13.3	1054	15	1089	LA-ICPMS zircon U-Pb	He, 2016
Jinshuikou metamorphic complex	Qingshuiquan	Migmatized biotite-plagioclase gneiss	NMH-54-56	457	72.1	521	8.4	535	7.8	535	LA-ICPMS zircon U-Pb	He, 2016
Jinshuikou metamorphic complex	Qingshuiquan	Migmatized biotite-plagioclase gneiss	NMH-54-57	772	73.7	582	10.8	535	8.1	535	LA-ICPMS zircon U-Pb	He, 2016
Jinshuikou metamorphic complex	Qingshuiquan	Migmatized biotite-plagioclase gneiss	NMH-54-58	581	72.5	542	9.2	532	7.8	532	LA-ICPMS zircon U-Pb	He, 2016
Jinshuikou metamorphic complex	Qingshuiquan	Migmatized biotite-plagioclase gneiss	NMH-54-59	1259	58.6	1124	11	1055	14.5	1259	LA-ICPMS zircon U-Pb	He, 2016
Jinshuikou metamorphic complex	Qingshuiquan	Migmatized biotite-plagioclase gneiss	NMH-54-60	653	79.3	559	11.7	536	8.3	536	LA-ICPMS zircon U-Pb	He, 2016
Jinshuikou metamorphic complex	Qingshuiquan	Migmatized biotite-plagioclase gneiss	NMH-54-61	482	70	521	7.6	530	7.7	530	LA-ICPMS zircon U-Pb	He, 2016
Jinshuikou metamorphic complex	Qingshuiquan	Migmatized biotite-plagioclase gneiss	NMH-54-62	613	73.5	550	9.7	535	8	535	LA-ICPMS zircon U-Pb	He, 2016
Jinshuikou metamorphic complex	Qingshuiquan	Migmatized biotite-plagioclase gneiss	NMH-54-63	541	77.5	535	10.3	534	8.1	534	LA-ICPMS zircon U-Pb	He, 2016
Jinshuikou metamorphic complex	Qingshuiquan	Migmatized biotite-plagioclase gneiss	NMH-54-64	558	70.7	537	8.5	531	7.8	531	LA-ICPMS zircon U-Pb	He, 2016
Jinshuikou metamorphic complex	Qingshuiquan	Migmatized biotite-plagioclase gneiss	NMH-54-65	483	74.2	524	9	533	7.9	533	LA-ICPMS zircon U-Pb	He, 2016
Jinshuikou metamorphic complex	East Balong	Cordierite-bearing two mica schist	NMH-53-01	2453	50.5	2342	12.2	2216	24.4	2453	LA-ICPMS zircon U-Pb	He, 2016
Jinshuikou metamorphic complex	East Balong	Cordierite-bearing two mica schist	NMH-53-02	1618	56.9	1490	11.7	1401	16.7	1618	LA-ICPMS zircon U-Pb	He, 2016
Jinshuikou metamorphic complex	East Balong	Cordierite-bearing two mica schist	NMH-53-03	2435	50.9	2374	12.6	2302	25.5	2435	LA-ICPMS zircon U-Pb	He, 2016
Jinshuikou metamorphic complex	East Balong	Cordierite-bearing two mica schist	NMH-53-04	2387	50.9	2316	12.2	2235	24.6	2387	LA-ICPMS zircon U-Pb	He, 2016
Jinshuikou metamorphic complex	East Balong	Cordierite-bearing two mica schist	NMH-53-05	1252	72	1086	17.2	1006	14.3	1252	LA-ICPMS zircon U-Pb	He, 2016
Jinshuikou metamorphic complex	East Balong	Cordierite-bearing two mica schist	NMH-53-06	1208	59.2	1134	9.5	1095	13.1	1208	LA-ICPMS zircon U-Pb	He, 2016
Jinshuikou metamorphic complex	East Balong	Cordierite-bearing two mica schist	NMH-53-07	1046	77.7	967	17.7	932	13.5	932	LA-ICPMS zircon U-Pb	He, 2016
Jinshuikou metamorphic complex	East Balong	Cordierite-bearing two mica schist	NMH-53-08	1279	67.6	1208	15.8	1169	15.7	1279	LA-ICPMS zircon U-Pb	He, 2016
Jinshuikou metamorphic complex	East Balong	Cordierite-bearing two mica schist	NMH-53-09	1546	59.9	1481	13.7	1437	17.9	1546	LA-ICPMS zircon U-Pb	He, 2016
Jinshuikou metamorphic complex	East Balong	Cordierite-bearing two mica schist	NMH-53-10	1228	61.9	1137	11.7	1091	13.6	1228	LA-ICPMS zircon U-Pb	He, 2016
Jinshuikou metamorphic complex	East Balong	Cordierite-bearing two mica schist	NMH-53-11	763	63.2	758	7.3	756	9.3	756	LA-ICPMS zircon U-Pb	He, 2016
Jinshuikou metamorphic complex	East Balong	Cordierite-bearing two mica schist	NMH-53-12	2243	56.5	2200	17.6	2154	28	2243	LA-ICPMS zircon U-Pb	He, 2016
Jinshuikou metamorphic complex	East Balong	Cordierite-bearing two mica schist	NMH-53-13	1322	77.8	1230	21.9	1178	18.1	1322	LA-ICPMS zircon U-Pb	He, 2016
Jinshuikou metamorphic complex	East Balong	Cordierite-bearing two mica schist	NMH-53-14	2858	48.8	2795	12.9	2709	29.1	2858	LA-ICPMS zircon U-Pb	He, 2016
Jinshuikou metamorphic complex	East Balong	Cordierite-bearing two mica schist	NMH-53-15	962	65.7	909	10.9	888	11.3	888	LA-ICPMS zircon U-Pb	He, 2016
Jinshuikou metamorphic complex	East Balong	Cordierite-bearing two mica schist	NMH-53-16	1616	57.1	1542	12	1488	17.8	1616	LA-ICPMS zircon U-Pb	He, 2016
Jinshuikou metamorphic complex	East Balong	Cordierite-bearing two mica schist	NMH-53-17	968	61.3	928	8.4	911	11.1	911	LA-ICPMS zircon U-Pb	He, 2016
Jinshuikou metamorphic complex	East Balong	Cordierite-bearing two mica schist	NMH-53-18	1030	66.1	964	11.9	936	12	936	LA-ICPMS zircon U-Pb	He, 2016
Jinshuikou metamorphic complex	East Balong	Cordierite-bearing two mica schist	NMH-53-19	2436	50.9	2339	12.5	2230	24.8	2436	LA-ICPMS zircon U-Pb	He, 2016
Jinshuikou metamorphic complex	East Balong	Cordierite-bearing two mica schist	NMH-53-20	2841	49.1	2725	13.3	2571	28.4	2841	LA-ICPMS zircon U-Pb	He, 2016
Jinshuikou metamorphic complex	East Balong	Cordierite-bearing two mica schist	NMH-53-21	987	65.4	929	11.1	905	11.6	905	LA-ICPMS zircon U-Pb	He, 2016
Jinshuikou metamorphic complex	East Balong	Cordierite-bearing two mica schist	NMH-53-22	1050	68.3	981	13.3	951	12.6	951	LA-ICPMS zircon U-Pb	He, 2016
Jinshuikou metamorphic complex	East Balong	Cordierite-bearing two mica schist	NMH-53-23	2450	50.8	2363	12.4	2265	25.1	2450	LA-ICPMS zircon U-Pb	He, 2016
Jinshuikou metamorphic complex	East Balong	Cordierite-bearing two mica schist	NMH-53-24	2518	56.5	2477	20	2427	33.8	2518	LA-ICPMS zircon U-Pb	He, 2016
Jinshuikou metamorphic complex	East Balong	Cordierite-bearing two mica schist	NMH-53-25	1263	66.4	1089	14.2	1004	13.4	1263	LA-ICPMS zircon U-Pb	He, 2016
Jinshuikou metamorphic complex	East Balong	Cordierite-bearing two mica schist	NMH-53-26	1181	61.1	1069	10.3	1015	12.6	1181	LA-ICPMS zircon U-Pb	He, 2016
Jinshuikou metamorphic complex	East Balong	Cordierite-bearing two mica schist	NMH-53-27	924	65	908	10.2	901	11.4	901	LA-ICPMS zircon U-Pb	He, 2016
Jinshuikou metamorphic complex	East Balong	Cordierite-bearing two mica schist	NMH-53-28	1232	75.3	1054	18.4	971	14.3	971	LA-ICPMS zircon U-Pb	He, 2016
Jinshuikou metamorphic complex	East Balong	Cordierite-bearing two mica schist	NMH-53-29	934	66.3	911	11	902	11.6	902	LA-ICPMS zircon U-Pb	He, 2016
Jinshuikou metamorphic complex	East Balong	Cordierite-bearing two mica schist	NMH-53-30	663	65.4	608	6.8	593	7.5	593	LA-ICPMS zircon U-Pb	He, 2016
Jinshuikou metamorphic complex	East Balong	Cordierite-bearing two mica schist	NMH-53-31	1684	57.2	1652	12.8	1626	19.6	1684	LA-ICPMS zircon U-Pb	He, 2016
Jinshuikou metamorphic complex	East Balong	Cordierite-bearing two mica schist	NMH-53-32	1114	68	988	13.5	932	12.4	932	LA-ICPMS zircon U-Pb	He, 2016
Jinshuikou metamorphic complex	East Balong	Cordierite-bearing two mica schist	NMH-53-33	1601	58.7	1544	13.3	1503	18.5	1601	LA-ICPMS zircon U-Pb	He, 2016
Jinshuikou metamorphic complex	East Balong	Cordierite-bearing two mica schist	NMH-53-34	474	91.9	461	11.8	458	6.7	458	LA-ICPMS zircon U-Pb	He, 2016
Jinshuikou metamorphic complex	East Balong	Cordierite-bearing two mica schist	NMH-53-35	1193	60.6	1145	10.4	1119	13.7	1193	LA-ICPMS zircon U-Pb	He, 2016
Jinshuikou metamorphic complex	East Balong	Cordierite-bearing two mica schist	NMH-53-36	1741	57.7	1622	13.6	1531	19	1741	LA-ICPMS zircon U-Pb	He, 2016
Jinshuikou metamorphic complex	East Balong	Cordierite-bearing two mica schist	NMH-53-37	2257	59.6	2191	20.5	2120	30.2	2257	LA-ICPMS zircon U-Pb	He, 2016
Jinshuikou metamorphic complex	East Balong	Cordierite-bearing two mica schist	NMH-53-38	1429	58.5	1271	10.8	1180	14.4	1429	LA-ICPMS zircon U-Pb	He, 2016
Jinshuikou metamorphic complex	East Balong	Cordierite-bearing two mica schist	NMH-53-39	725	65	652	7.3	631	8	631	LA-ICPMS zircon U-Pb	He, 2016
Jinshuikou metamorphic complex	East Balong	Cordierite-bearing two mica schist	NMH-53-40	1107	61.3	1041	9.8	1009	12.5	1107	LA-ICPMS zircon U-Pb	He, 2016
Jinshuikou metamorphic complex	East Balong	Cordierite-bearing two mica schist	NMH-53-41	1657	57.9	1586	13.1	1532	18.8	1657	LA-ICPMS zircon U-Pb	He, 2016
Jinshuikou metamorphic complex	East Balong	Cordierite-bearing two mica schist	NMH-53-42	839	65.1	776	8.9	754	9.6	754	LA-ICPMS zircon U-Pb	He, 2016
Jinshuikou metamorphic complex	East Balong	Cordierite-bearing two mica schist	NMH-53-43	2702	49.9	2646	13.2	2574	28.5	2702	LA-ICPMS zircon U-Pb	He, 2016
Jinshuikou metamorphic complex	East Balong	Cordierite-bearing two mica schist	NMH-53-44	1332	59.2	1233	10.6	1177	14.4	1332	LA-ICPMS zircon U-Pb	He, 2016
Jinshuikou metamorphic complex	Dazhaohuo	Migmatized biotite-plagioclase gneiss	NMH-21-01	354	75	398	6.9	405	5.6	405	LA-ICPMS zircon U-Pb	He, 2016
Jinshuikou metamorphic complex	Dazhaohuo	Migmatized biotite-plagioclase gneiss	NMH-21-02	1479	64.7	1381	16.9	1319	18.4	1479	LA-ICPMS zircon U-Pb	He, 2016
Jinshuikou metamorphic complex	Dazhaohuo	Migmatized biotite-plagioclase gneiss	NMH-21-03	905	64.3	868	10.1	854	11.2	854	LA-ICPMS zircon U-Pb	He, 2016
Jinshuikou metamorphic complex	Dazhaohuo	Migmatized biotite-plagioclase gneiss	NMH-21-04	1030	63.6	902	10.6	851	11.3	851	LA-ICPMS zircon U-Pb	He, 2016
Jinshuikou metamorphic complex	Dazhaohuo	Migmatized biotite-plagioclase gneiss	NMH-21-05	1709	55.9	1678	12.6	1652	20.3	1709	LA-ICPMS zircon U-Pb	He, 2016
Jinshuikou metamorphic complex	Dazhaohuo	Migmatized biotite-plagioclase gneiss	NMH-21-06	625	71.4	440	7.2	406	5.6	406	LA-ICPMS zircon U-Pb	He, 2016
Jinshuikou metamorphic complex	Dazhaohuo	Migmatized biotite-plagioclase gneiss	NMH-21-07	1044	73	988	16.1	963	13.9	963	LA-ICPMS zircon U-Pb	He, 2016
Jinshuikou metamorphic complex	Dazhaohuo	Migmatized biotite-plagioclase gneiss	NMH-21-08	961	63.8	888	10.2	859	11.3	859	LA-ICPMS zircon U-Pb	He, 2016
Jinshuikou metamorphic complex	Dazhaohuo	Migmatized biotite-plagioclase gneiss	NMH-21-09	533	66.5	417	5.1	396	5.3	396	LA-ICPMS zircon U-Pb	He, 2016
Jinshuikou metamorphic complex	Dazhaohuo	Migmatized biotite-plagioclase gneiss	NMH-21-10	921	61.8	922	9.1	922	11.8	922	LA-ICPMS zircon U-Pb	He, 2016
Jinshuikou metamorphic complex	Dazhaohuo	Migmatized biotite-plagioclase gneiss	NMH-21-11	879	65	807	9.8	780	10.3	780	LA-ICPMS zircon U-Pb	He, 2016
Jinshuikou metamorphic complex	Dazhaohuo	Migmatized biotite-plagioclase gneiss	NMH-21-12	854	64.8	688	8.6	638	8.5	638	LA-ICPMS zircon U-Pb	He, 2016
Jinshuikou metamorphic complex	Dazhaohuo	Migmatized biotite-plagioclase gneiss	NMH-21-13	991	64.6	928	11.3	901	12	901	LA-ICPMS zircon U-Pb	He, 2016
Jinshuikou metamorphic complex	Dazhaohuo	Migmatized biotite-plagioclase gneiss	NMH-21-14	951	65.1	894	10.8	871	11.5	871	LA-ICPMS zircon U-Pb	He, 2016
Jinshuikou metamorphic complex	Dazhaohuo	Migmatized biotite-plagioclase gneiss	NMH-21-15	939	62.7	900	9.6	884	11.5	884	LA-ICPMS zircon U-Pb	He, 2016
Jinshuikou metamorphic complex	Dazhaohuo	Migmatized biotite-plagioclase gneiss	NMH-21-16	594	74.9	422	8	391	5.5	391	LA-ICPMS zircon U-Pb	He, 2016
Jinshuikou metamorphic complex	Dazhaohuo	Migmatized biotite-plagioclase gneiss	NMH-21-17	910	64.8	874	10.4	860	11.3	860	LA-ICPMS zircon U-Pb	He, 2016
Jinshuikou metamorphic complex	Dazhaohuo	Migmatized biotite-plagioclase gneiss	NMH-21-18	1283	61.9	1142	12.5	1069	14.1	1283	LA-ICPMS zircon U-Pb	He, 2016
Jinshuikou metamorphic complex	Dazhaohuo	Migmatized biotite-plagioclase gneiss	NMH-21-19	611	98.9	436	13.6	403	6.6	403	LA-ICPMS zircon U-Pb	He, 2016
Jinshuikou metamorphic complex	Dazhaohuo	Migmatized biotite-plagioclase gneiss	NMH-21-20	944	69.1	932	13.2	927	12.7	927	LA-ICPMS zircon U-Pb	He, 2016
Jinshuikou metamorphic complex	Dazhaohuo	Migmatized biotite-plagioclase gneiss	NMH-21-21	663	67.7	451	6.5	410	5.6	410	LA-ICPMS zircon U-Pb	He, 2016
Jinshuikou metamorphic complex	Dazhaohuo	Migmatized biotite-plagioclase gneiss	NMH-21-22	949	64.3	832	10	789	10.4	789	LA-ICPMS zircon U-Pb	He, 2016
Jinshuikou metamorphic complex	Dazhaohuo	Migmatized biotite-plagioclase gneiss	NMH-21-23	930	75.5	859	15.2	832	12.1	832	LA-ICPMS zircon U-Pb	He, 2016
Jinshuikou metamorphic complex	Dazhaohuo	Migmatized biotite-plagioclase gneiss	NMH-21-24	788	66.2	613	8.2	566	7.6	566	LA-ICPMS zircon U-Pb	He, 2016
Jinshuikou metamorphic complex	Dazhaohuo	Migmatized biotite-plagioclase gneiss	NMH-21-25	666	67.7	581	7.9	559	7.5	559	LA-ICPMS zircon U-Pb	He, 2016
Jinshuikou metamorphic complex	Dazhaohuo	Migmatized biotite-plagioclase gneiss	NMH-21-26	1058	61.3	936	9.4	885	11.4	885	LA-ICPMS zircon U-Pb	He, 2016
Jinshuikou metamorphic complex	Dazhaohuo	Migmatized biotite-plagioclase gneiss	NMH-21-27	744	66.8	584	7.9	544	7.3	544	LA-ICPMS zircon U-Pb	He, 2016
Jinshuikou metamorphic complex	Dazhaohuo	Migmatized biotite-plagioclase gneiss	NMH-21-28	527	97.7	418	10.5	399	6	399	LA-ICPMS zircon U-Pb	He, 2016
Jinshuikou metamorphic complex	Dazhaohuo	Migmatized biotite-plagioclase gneiss	NMH-21-29	795	72.2	667	11.1	630	8.8	630	LA-ICPMS zircon U-Pb	He, 2016
Jinshuikou metamorphic complex	Dazhaohuo	Migmatized biotite-plagioclase gneiss	NMH-21-30	965	68.3	958	13.1	954	13	954	LA-ICPMS zircon U-Pb	He, 2016
Jinshuikou metamorphic complex	Dazhaohuo	Migmatized biotite-plagioclase gneiss	NMH-21-31	903	68.1	831	11.5	804	10.9	804	LA-ICPMS zircon U-Pb	He, 2016
Jinshuikou metamorphic complex	Dazhaohuo	Migmatized biotite-plagioclase gneiss	NMH-21-32	638	66.3	498	6.4	468	6.2	468	LA-ICPMS zircon U-Pb	He, 2016
Jinshuikou metamorphic complex	Dazhaohuo	Migmatized biotite-plagioclase gneiss	NMH-21-33	1455	61.4	1330	14.1	1253	16.6	1455	LA-ICPMS zircon U-Pb	He, 2016
Jinshuikou metamorphic complex	Dazhaohuo	Migmatized biotite-plagioclase gneiss	NMH-21-34	551	66.3	428	5.4	405	5.4	405	LA-ICPMS zircon U-Pb	He, 2016
Jinshuikou metamorphic complex	Dazhaohuo	Migmatized biotite-plagioclase gneiss	NMH-21-35	956	63.2	895	10	871	11.4	871	LA-ICPMS zircon U-Pb	He, 2016
Jinshuikou metamorphic complex	Dazhaohuo	Migmatized biotite-plagioclase gneiss	NMH-21-36	693	68.1	570	8	539	7.3	539	LA-ICPMS zircon U-Pb	He, 2016
Jinshuikou metamorphic complex	Dazhaohuo	Migmatized biotite-plagioclase gneiss	NMH-21-37	998	63	870	9.7	820	10.7	820	LA-ICPMS zircon U-Pb	He, 2016
Jinshuikou metamorphic complex	Dazhaohuo	Migmatized biotite-plagioclase gneiss	NMH-21-38	755	75.2	631	11.4	597	8.5	597	LA-ICPMS zircon U-Pb	He, 2016
Jinshuikou metamorphic complex	Dazhaohuo	Migmatized biotite-plagioclase gneiss	NMH-21-39	951	65.8	918	11.3	904	12	904	LA-ICPMS zircon U-Pb	He, 2016
Jinshuikou metamorphic complex	Dazhaohuo	Migmatized biotite-plagioclase gneiss	NMH-21-40	498	68.4	411	5.5	395	5.3	395	LA-ICPMS zircon U-Pb	He, 2016
Jinshuikou metamorphic complex	Dazhaohuo	Migmatized biotite-plagioclase gneiss	NMH-21-41	1603	57.9	1573	13.4	1550	19.6	1603	LA-ICPMS zircon U-Pb	He, 2016
Jinshuikou metamorphic complex	Dazhaohuo	Migmatized biotite-plagioclase gneiss	NMH-21-42	770	64.9	641	7.7	605	8	605	LA-ICPMS zircon U-Pb	He, 2016
Jinshuikou metamorphic complex	Dazhaohuo	Migmatized biotite-plagioclase gneiss	NMH-21-43	1228	71.9	1171	18.1	1140	16.6	1228	LA-ICPMS zircon U-Pb	He, 2016
Jinshuikou metamorphic complex	Dazhaohuo	Migmatized biotite-plagioclase gneiss	NMH-21-44	1063	81.1	1047	20.4	1040	16.1	1063	LA-ICPMS zircon U-Pb	He, 2016
Jinshuikou metamorphic complex	Dazhaohuo	Migmatized biotite-plagioclase gneiss	NMH-21-45	913	67.8	835	11.4	805	10.9	805	LA-ICPMS zircon U-Pb	He, 2016
Jinshuikou metamorphic complex	Dazhaohuo	Migmatized biotite-plagioclase gneiss	NMH-21-46	948	67.1	926	12	917	12.3	917	LA-ICPMS zircon U-Pb	He, 2016
Jinshuikou metamorphic complex	Dazhaohuo	Migmatized biotite-plagioclase gneiss	NMH-21-47	941	65.7	746	9.7	682	9.1	682	LA-ICPMS zircon U-Pb	He, 2016
Jinshuikou metamorphic complex	Dazhaohuo	Migmatized biotite-plagioclase gneiss	NMH-21-48	925	66	899	11.1	888	11.8	888	LA-ICPMS zircon U-Pb	He, 2016
Jinshuikou metamorphic complex	Dazhaohuo	Biotite plagioclase gneiss	NMH-22-1	1104	68.7	1017	14.5	977	13.4	977	LA-ICPMS zircon U-Pb	He, 2016
Jinshuikou metamorphic complex	Dazhaohuo	Biotite plagioclase gneiss	NMH-22-2	890	66.3	884	11.1	881	11.5	881	LA-ICPMS zircon U-Pb	He, 2016
Jinshuikou metamorphic complex	Dazhaohuo	Biotite plagioclase gneiss	NMH-22-3	873	63.5	860	9.3	854	10.9	854	LA-ICPMS zircon U-Pb	He, 2016
Jinshuikou metamorphic complex	Dazhaohuo	Biotite plagioclase gneiss	NMH-22-4	1246	82.8	1172	23.7	1132	18.5	1246	LA-ICPMS zircon U-Pb	He, 2016
Jinshuikou metamorphic complex	Dazhaohuo	Biotite plagioclase gneiss	NMH-22-5	1062	72.4	991	15.8	960	13.6	960	LA-ICPMS zircon U-Pb	He, 2016
Jinshuikou metamorphic complex	Dazhaohuo	Biotite plagioclase gneiss	NMH-22-6	903	65.5	828	10.3	801	10.5	801	LA-ICPMS zircon U-Pb	He, 2016
Jinshuikou metamorphic complex	Dazhaohuo	Biotite plagioclase gneiss	NMH-22-7	983	65.7	942	11.7	925	12.2	925	LA-ICPMS zircon U-Pb	He, 2016
Jinshuikou metamorphic complex	Dazhaohuo	Biotite plagioclase gneiss	NMH-22-8	1190	62.1	1187	12.4	1185	15.3	1190	LA-ICPMS zircon U-Pb	He, 2016
Jinshuikou metamorphic complex	Dazhaohuo	Biotite plagioclase gneiss	NMH-22-9	878	78.3	788	15.2	756	11.1	756	LA-ICPMS zircon U-Pb	He, 2016
Jinshuikou metamorphic complex	Dazhaohuo	Biotite plagioclase gneiss	NMH-22-10	910	64.6	907	10.5	906	11.8	906	LA-ICPMS zircon U-Pb	He, 2016
Jinshuikou metamorphic complex	Dazhaohuo	Biotite plagioclase gneiss	NMH-22-11	915	62.4	910	9.3	907	11.6	907	LA-ICPMS zircon U-Pb	He, 2016
Jinshuikou metamorphic complex	Dazhaohuo	Biotite plagioclase gneiss	NMH-22-12	941	63.3	886	9.8	864	11.2	864	LA-ICPMS zircon U-Pb	He, 2016
Jinshuikou metamorphic complex	Dazhaohuo	Biotite plagioclase gneiss	NMH-22-13	911	68.3	783	11.3	739	10.1	739	LA-ICPMS zircon U-Pb	He, 2016
Jinshuikou metamorphic complex	Dazhaohuo	Biotite plagioclase gneiss	NMH-22-14	943	86.7	754	18	692	11	692	LA-ICPMS zircon U-Pb	He, 2016
Jinshuikou metamorphic complex	Dazhaohuo	Biotite plagioclase gneiss	NMH-22-15	923	68.7	909	12.7	903	12.3	903	LA-ICPMS zircon U-Pb	He, 2016
Jinshuikou metamorphic complex	Dazhaohuo	Biotite plagioclase gneiss	NMH-22-16	984	69.7	874	13.3	831	11.6	831	LA-ICPMS zircon U-Pb	He, 2016
Jinshuikou metamorphic complex	Dazhaohuo	Biotite plagioclase gneiss	NMH-22-17	860	76.4	742	13.8	703	10.2	703	LA-ICPMS zircon U-Pb	He, 2016
Jinshuikou metamorphic complex	Dazhaohuo	Biotite plagioclase gneiss	NMH-22-18	1032	63.9	937	11	897	11.9	897	LA-ICPMS zircon U-Pb	He, 2016
Jinshuikou metamorphic complex	Dazhaohuo	Biotite plagioclase gneiss	NMH-22-19	1336	62.9	1256	14.1	1209	16.2	1336	LA-ICPMS zircon U-Pb	He, 2016
Jinshuikou metamorphic complex	Dazhaohuo	Biotite plagioclase gneiss	NMH-22-20	942	63.4	879	9.8	854	11.2	854	LA-ICPMS zircon U-Pb	He, 2016
Jinshuikou metamorphic complex	Dazhaohuo	Biotite plagioclase gneiss	NMH-22-21	917	64.9	899	10.7	892	11.8	892	LA-ICPMS zircon U-Pb	He, 2016
Jinshuikou metamorphic complex	Dazhaohuo	Biotite plagioclase gneiss	NMH-22-22	1493	61.1	1474	15	1461	19.4	1493	LA-ICPMS zircon U-Pb	He, 2016
Jinshuikou metamorphic complex	Dazhaohuo	Biotite plagioclase gneiss	NMH-22-23	962	69.5	931	13.5	918	12.7	918	LA-ICPMS zircon U-Pb	He, 2016
Jinshuikou metamorphic complex	Dazhaohuo	Biotite plagioclase gneiss	NMH-22-24	908	67.5	898	12	894	12.1	894	LA-ICPMS zircon U-Pb	He, 2016
Jinshuikou metamorphic complex	Dazhaohuo	Biotite plagioclase gneiss	NMH-22-25	1201	87.9	1166	25.8	1147	19.8	1201	LA-ICPMS zircon U-Pb	He, 2016
Jinshuikou metamorphic complex	Dazhaohuo	Biotite plagioclase gneiss	NMH-22-26	970	79.7	948	18.3	939	14.3	939	LA-ICPMS zircon U-Pb	He, 2016
Jinshuikou metamorphic complex	Dazhaohuo	Biotite plagioclase gneiss	NMH-22-27	1408	58.6	1374	12.2	1352	17.3	1408	LA-ICPMS zircon U-Pb	He, 2016
Jinshuikou metamorphic complex	Dazhaohuo	Biotite plagioclase gneiss	NMH-22-28	947	74.8	942	16	940	13.7	940	LA-ICPMS zircon U-Pb	He, 2016
Jinshuikou metamorphic complex	Dazhaohuo	Biotite plagioclase gneiss	NMH-22-29	912	66.5	909	11.6	907	12.3	907	LA-ICPMS zircon U-Pb	He, 2016
Jinshuikou metamorphic complex	Dazhaohuo	Biotite plagioclase gneiss	NMH-22-30	824	64.5	712	8.5	677	9.1	677	LA-ICPMS zircon U-Pb	He, 2016
Jinshuikou metamorphic complex	Dazhaohuo	Biotite plagioclase gneiss	NMH-22-31	933	75.5	899	15.8	885	13	885	LA-ICPMS zircon U-Pb	He, 2016
Jinshuikou metamorphic complex	Dazhaohuo	Biotite plagioclase gneiss	NMH-22-32	933	67.1	929	12.2	928	12.7	928	LA-ICPMS zircon U-Pb	He, 2016
Jinshuikou metamorphic complex	Dazhaohuo	Biotite plagioclase gneiss	NMH-22-33	953	69	890	12.9	865	12.1	865	LA-ICPMS zircon U-Pb	He, 2016
Jinshuikou metamorphic complex	Dazhaohuo	Biotite plagioclase gneiss	NMH-22-34	929	66.7	889	11.6	872	11.9	872	LA-ICPMS zircon U-Pb	He, 2016
Jinshuikou metamorphic complex	Dazhaohuo	Biotite plagioclase gneiss	NMH-22-35	1504	60.4	1444	14.5	1403	18.8	1504	LA-ICPMS zircon U-Pb	He, 2016
Jinshuikou metamorphic complex	Dazhaohuo	Biotite plagioclase gneiss	NMH-22-36	897	66.7	785	10.6	746	10.3	746	LA-ICPMS zircon U-Pb	He, 2016
Jinshuikou metamorphic complex	Dazhaohuo	Biotite plagioclase gneiss	NMH-22-37	1072	60.4	1030	19.1	1011	15.5	1072	LA-ICPMS zircon U-Pb	He, 2016
Jinshuikou metamorphic complex	Dazhaohuo	Biotite plagioclase gneiss	NMH-22-38	963	66.7	920	10.2	902	12.1	902	LA-ICPMS zircon U-Pb	He, 2016
Jinshuikou metamorphic complex	Dazhaohuo	Biotite plagioclase gneiss	NMH-22-39	856	78.2	833	14.7	825	12.1	825	LA-ICPMS zircon U-Pb	He, 2016
Jinshuikou metamorphic complex	Dazhaohuo	Biotite plagioclase gneiss	NMH-22-40	1228	63.2	1165	14	1130	15.6	1228	LA-ICPMS zircon U-Pb	He, 2016
Jinshuikou metamorphic complex	Dazhaohuo	Biotite plagioclase gneiss	NMH-22-41	1037	75.7	993	20.4	973	15.5	973	LA-ICPMS zircon U-Pb	He, 2016
Jinshuikou metamorphic complex	Dazhaohuo	Biotite plagioclase gneiss	NMH-22-42	909	64.3	882	12	871	12.1	871	LA-ICPMS zircon U-Pb	He, 2016
Jinshuikou metamorphic complex	Dazhaohuo	Biotite plagioclase gneiss	NMH-22-43	957	82.5	854	9.7	814	11	814	LA-ICPMS zircon U-Pb	He, 2016
Jinshuikou metamorphic complex	Dazhaohuo	Biotite plagioclase gneiss	NMH-22-44	1300	67.7	1283	18.8	1272	18.9	1300	LA-ICPMS zircon U-Pb	He, 2016
Jinshuikou metamorphic complex	Dazhaohuo	Biotite plagioclase gneiss	NMH-22-45	907	63.1	783	10.4	739	10.2	739	LA-ICPMS zircon U-Pb	He, 2016
Jinshuikou metamorphic complex	Dazhaohuo	Biotite plagioclase gneiss	NMH-22-46	1033	70.6	996	12.6	978	13.5	978	LA-ICPMS zircon U-Pb	He, 2016
Jinshuikou metamorphic complex	Dazhaohuo	Biotite plagioclase gneiss	NMH-22-47	1076	66.1	921	11	858	11.7	858	LA-ICPMS zircon U-Pb	He, 2016
Jinshuikou metamorphic complex	Dazhaohuo	Biotite plagioclase gneiss	NMH-22-48	981	65.8	921	11	896	12.2	896	LA-ICPMS zircon U-Pb	He, 2016
Jinshuikou metamorphic complex	Dazhaohuo	Biotite plagioclase gneiss	NMH-22-49	876	63.5	867	15	863	12.7	863	LA-ICPMS zircon U-Pb	He, 2016
Jinshuikou metamorphic complex	Dazhaohuo	Biotite plagioclase gneiss	NMH-22-50	942	64.4	929	13.2	923	13.1	923	LA-ICPMS zircon U-Pb	He, 2016
Jinshuikou metamorphic complex	Dazhaohuo	Biotite plagioclase gneiss	NMH-22-51	881	75.2	892	11.2	897	12.3	897	LA-ICPMS zircon U-Pb	He, 2016
Jinshuikou metamorphic complex	Dazhaohuo	Biotite plagioclase gneiss	NMH-22-52	1061	69	1008	11.7	984	13.5	984	LA-ICPMS zircon U-Pb	He, 2016
Jinshuikou metamorphic complex	Dazhaohuo	Biotite plagioclase gneiss	NMH-22-53	987	66.2	908	16.8	875	13.3	875	LA-ICPMS zircon U-Pb	He, 2016
Jinshuikou metamorphic complex	Dazhaohuo	Biotite plagioclase gneiss	NMH-22-54	972	63.8	924	14.6	904	13.2	904	LA-ICPMS zircon U-Pb	He, 2016
Jinshuikou metamorphic complex	Dazhaohuo	Biotite plagioclase gneiss	NMH-22-55	850	76.6	711	19.3	667	11.3	667	LA-ICPMS zircon U-Pb	He, 2016
Jinshuikou metamorphic complex	Dazhaohuo	Biotite plagioclase gneiss	NMH-22-56	1535	62.2	1514	16.4	1499	20.9	1535	LA-ICPMS zircon U-Pb	He, 2016
Jinshuikou metamorphic complex	Dazhaohuo	Biotite plagioclase gneiss	NMH-22-57	932	70.2	935	13.8	936	13.4	936	LA-ICPMS zircon U-Pb	He, 2016
Jinshuikou metamorphic complex	Dazhaohuo	Biotite plagioclase gneiss	NMH-22-58	1049	71.2	989	15.4	962	14.1	962	LA-ICPMS zircon U-Pb	He, 2016
Jinshuikou metamorphic complex	Dazhaohuo	Biotite plagioclase gneiss	NMH-22-59	510	72.1	443	7.1	431	5.9	431	LA-ICPMS zircon U-Pb	He, 2016
Jinshuikou metamorphic complex	Dazhaohuo	Biotite plagioclase gneiss	NMH-22-60	608	77	452	9	422	6.3	422	LA-ICPMS zircon U-Pb	He, 2016
Jinshuikou metamorphic complex	Dazhaohuo	Biotite plagioclase gneiss	NMH-22-61	1663	57	1621	13.6	1589	20.9	1663	LA-ICPMS zircon U-Pb	He, 2016
Jinshuikou metamorphic complex	Xiangyanggou	Biotite plagioclase gneiss	NMH-24-01	1305	64.4	1201	14.3	1143	15.4	1305	LA-ICPMS zircon U-Pb	He, 2016
Jinshuikou metamorphic complex	Xiangyanggou	Biotite plagioclase gneiss	NMH-24-02	1591	72.3	1407	22.1	1287	20.2	1591	LA-ICPMS zircon U-Pb	He, 2016
Jinshuikou metamorphic complex	Xiangyanggou	Biotite plagioclase gneiss	NMH-24-03	1348	64.3	1246	14.8	1187	16.1	1348	LA-ICPMS zircon U-Pb	He, 2016
Jinshuikou metamorphic complex	Xiangyanggou	Biotite plagioclase gneiss	NMH-24-04	434	74.6	408	7.1	403	5.6	403	LA-ICPMS zircon U-Pb	He, 2016
Jinshuikou metamorphic complex	Xiangyanggou	Biotite plagioclase gneiss	NMH-24-05	1384	59.8	1258	12.2	1185	15.3	1384	LA-ICPMS zircon U-Pb	He, 2016
Jinshuikou metamorphic complex	Xiangyanggou	Biotite plagioclase gneiss	NMH-24-06	1310	71.8	1196	18.6	1134	16.7	1310	LA-ICPMS zircon U-Pb	He, 2016
Jinshuikou metamorphic complex	Xiangyanggou	Biotite plagioclase gneiss	NMH-24-07	1436	61.5	1284	13.6	1195	15.8	1436	LA-ICPMS zircon U-Pb	He, 2016
Jinshuikou metamorphic complex	Xiangyanggou	Biotite plagioclase gneiss	NMH-24-08	1445	63.4	1284	15	1190	16.2	1445	LA-ICPMS zircon U-Pb	He, 2016
Jinshuikou metamorphic complex	Xiangyanggou	Biotite plagioclase gneiss	NMH-24-09	1137	70.5	945	14.8	864	12.3	864	LA-ICPMS zircon U-Pb	He, 2016
Jinshuikou metamorphic complex	Xiangyanggou	Biotite plagioclase gneiss	NMH-24-10	1339	59.9	1205	11.6	1132	14.6	1339	LA-ICPMS zircon U-Pb	He, 2016
Jinshuikou metamorphic complex	Xiangyanggou	Biotite plagioclase gneiss	NMH-24-11	1412	60.1	1275	12.6	1194	15.6	1412	LA-ICPMS zircon U-Pb	He, 2016
Jinshuikou metamorphic complex	Xiangyanggou	Biotite plagioclase gneiss	NMH-24-12	2443	63	2320	25.4	2182	36.4	2443	LA-ICPMS zircon U-Pb	He, 2016
Jinshuikou metamorphic complex	Xiangyanggou	Biotite plagioclase gneiss	NMH-24-13	1633	75.7	1446	24.6	1322	22	1633	LA-ICPMS zircon U-Pb	He, 2016
Jinshuikou metamorphic complex	Xiangyanggou	Biotite plagioclase gneiss	NMH-24-14	1114	74.9	1006	17.4	957	14.2	957	LA-ICPMS zircon U-Pb	He, 2016
Jinshuikou metamorphic complex	Xiangyanggou	Biotite plagioclase gneiss	NMH-24-15	1227	59.5	1042	9.9	956	12.3	956	LA-ICPMS zircon U-Pb	He, 2016
Jinshuikou metamorphic complex	Xiangyanggou	Biotite plagioclase gneiss	NMH-24-16	1254	93.6	1123	27.9	1057	19.3	1254	LA-ICPMS zircon U-Pb	He, 2016
Jinshuikou metamorphic complex	Xiangyanggou	Biotite plagioclase gneiss	NMH-24-17	1395	97.2	1219	31.6	1121	22	1395	LA-ICPMS zircon U-Pb	He, 2016
Jinshuikou metamorphic complex	Xiangyanggou	Biotite plagioclase gneiss	NMH-24-18	1597	63.2	1490	16.9	1415	19.6	1597	LA-ICPMS zircon U-Pb	He, 2016
Jinshuikou metamorphic complex	Xiangyanggou	Biotite plagioclase gneiss	NMH-24-19	1511	64.2	1377	16.5	1291	18	1511	LA-ICPMS zircon U-Pb	He, 2016
Jinshuikou metamorphic complex	Xiangyanggou	Biotite plagioclase gneiss	NMH-24-20	1390	58.6	1258	11.3	1182	15.2	1390	LA-ICPMS zircon U-Pb	He, 2016
Jinshuikou metamorphic complex	Xiangyanggou	Biotite plagioclase gneiss	NMH-24-21	1171	74.8	1090	18.5	1050	15.7	1171	LA-ICPMS zircon U-Pb	He, 2016
Jinshuikou metamorphic complex	Xiangyanggou	Biotite plagioclase gneiss	NMH-24-22	1634	62.2	1561	16.9	1507	20.7	1634	LA-ICPMS zircon U-Pb	He, 2016
Jinshuikou metamorphic complex	Xiangyanggou	Biotite plagioclase gneiss	NMH-24-23	1022	73.7	817	14.3	744	10.9	744	LA-ICPMS zircon U-Pb	He, 2016
Jinshuikou metamorphic complex	Xiangyanggou	Biotite plagioclase gneiss	NMH-24-24	1100	81.1	1045	20.5	1018	16	1100	LA-ICPMS zircon U-Pb	He, 2016
Jinshuikou metamorphic complex	Xiangyanggou	Biotite plagioclase gneiss	NMH-24-25	1092	63.7	905	10.8	831	11.2	831	LA-ICPMS zircon U-Pb	He, 2016
Jinshuikou metamorphic complex	Xiangyanggou	Biotite plagioclase gneiss	NMH-24-26	985	112.1	788	27.2	720	14	720	LA-ICPMS zircon U-Pb	He, 2016
Jinshuikou metamorphic complex	Xiangyanggou	Biotite plagioclase gneiss	NMH-24-27	1678	58.4	1481	13.8	1348	17.7	1678	LA-ICPMS zircon U-Pb	He, 2016
Jinshuikou metamorphic complex	Xiangyanggou	Biotite plagioclase gneiss	NMH-24-28	1463	58.3	1354	11.8	1286	16.5	1463	LA-ICPMS zircon U-Pb	He, 2016
Jinshuikou metamorphic complex	Xiangyanggou	Biotite plagioclase gneiss	NMH-24-29	1232	63.9	1052	12.8	968	13.2	968	LA-ICPMS zircon U-Pb	He, 2016
Jinshuikou metamorphic complex	Xiangyanggou	Biotite plagioclase gneiss	NMH-24-30	1614	65.8	1457	18.6	1351	19.7	1614	LA-ICPMS zircon U-Pb	He, 2016
Jinshuikou metamorphic complex	Xiangyanggou	Biotite plagioclase gneiss	NMH-24-31	1377	64.4	1235	15.1	1156	16	1377	LA-ICPMS zircon U-Pb	He, 2016
Jinshuikou metamorphic complex	Xiangyanggou	Biotite plagioclase gneiss	NMH-24-32	1349	61.3	1256	13	1203	15.9	1349	LA-ICPMS zircon U-Pb	He, 2016
Jinshuikou metamorphic complex	Xiangyanggou	Biotite plagioclase gneiss	NMH-24-33	1120	76	961	17.4	892	13.5	892	LA-ICPMS zircon U-Pb	He, 2016
Jinshuikou metamorphic complex	Xiangyanggou	Biotite plagioclase gneiss	NMH-24-34	1518	72.2	1460	22.1	1420	22.1	1518	LA-ICPMS zircon U-Pb	He, 2016
Jinshuikou metamorphic complex	Xiangyanggou	Biotite plagioclase gneiss	NMH-24-35	1141	63.2	1037	11.7	989	13.2	989	LA-ICPMS zircon U-Pb	He, 2016
Jinshuikou metamorphic complex	Xiangyanggou	Biotite plagioclase gneiss	NMH-24-37	1117	62.7	982	11	922	12.3	922	LA-ICPMS zircon U-Pb	He, 2016
Jinshuikou metamorphic complex	Nalingguole River	Biotite schist	NLG-55-01	440	84	411	9.3	406	6	406	LA-ICPMS zircon U-Pb	He, 2016
Jinshuikou metamorphic complex	Nalingguole River	Biotite schist	NLG-55-02	925	65.4	921	11	920	12.4	920	LA-ICPMS zircon U-Pb	He, 2016
Jinshuikou metamorphic complex	Nalingguole River	Biotite schist	NLG-55-03	916	73.7	890	14.7	880	12.7	880	LA-ICPMS zircon U-Pb	He, 2016
Jinshuikou metamorphic complex	Nalingguole River	Biotite schist	NLG-55-04	931	74	929	15.3	928	13.4	928	LA-ICPMS zircon U-Pb	He, 2016
Jinshuikou metamorphic complex	Nalingguole River	Biotite schist	NLG-55-05	946	64.4	942	10.7	940	12.6	940	LA-ICPMS zircon U-Pb	He, 2016
Jinshuikou metamorphic complex	Nalingguole River	Biotite schist	NLG-55-06	409	96.6	406	11.7	405	6.3	405	LA-ICPMS zircon U-Pb	He, 2016
Jinshuikou metamorphic complex	Nalingguole River	Biotite schist	NLG-55-07	547	138.1	419	20.3	397	8	397	LA-ICPMS zircon U-Pb	He, 2016
Jinshuikou metamorphic complex	Nalingguole River	Biotite schist	NLG-55-08	352	91.2	399	10.3	407	6.2	407	LA-ICPMS zircon U-Pb	He, 2016
Jinshuikou metamorphic complex	Nalingguole River	Biotite schist	NLG-55-09	474	78.6	417	8.1	407	5.8	407	LA-ICPMS zircon U-Pb	He, 2016
Jinshuikou metamorphic complex	Nalingguole River	Biotite schist	NLG-55-10	959	71.5	893	13.9	867	12.3	867	LA-ICPMS zircon U-Pb	He, 2016
Jinshuikou metamorphic complex	Nalingguole River	Biotite schist	NLG-55-11	953	72.4	919	14.5	905	12.9	905	LA-ICPMS zircon U-Pb	He, 2016
Jinshuikou metamorphic complex	Nalingguole River	Biotite schist	NLG-55-12	362	111.2	386	13.8	391	6.6	391	LA-ICPMS zircon U-Pb	He, 2016
Jinshuikou metamorphic complex	Nalingguole River	Biotite schist	NLG-55-13	1040	90.6	897	22.1	840	14.1	840	LA-ICPMS zircon U-Pb	He, 2016
Jinshuikou metamorphic complex	Nalingguole River	Biotite schist	NLG-55-14	938	67.1	908	11.7	896	12.1	896	LA-ICPMS zircon U-Pb	He, 2016
Jinshuikou metamorphic complex	Nalingguole River	Biotite schist	NLG-55-16	961	65.5	940	11.2	931	12.4	931	LA-ICPMS zircon U-Pb	He, 2016
Jinshuikou metamorphic complex	Nalingguole River	Biotite schist	NLG-55-17	974	65.2	924	11	904	12	904	LA-ICPMS zircon U-Pb	He, 2016
Jinshuikou metamorphic complex	Nalingguole River	Biotite schist	NLG-55-18	609	80.8	439	9.5	407	5.9	407	LA-ICPMS zircon U-Pb	He, 2016
Jinshuikou metamorphic complex	Nalingguole River	Biotite schist	NLG-55-19	2513	51.3	2483	14.1	2445	28.9	2513	LA-ICPMS zircon U-Pb	He, 2016
Jinshuikou metamorphic complex	Nalingguole River	Biotite schist	NLG-55-20	1698	57	1657	13.1	1624	20.3	1698	LA-ICPMS zircon U-Pb	He, 2016
Jinshuikou metamorphic complex	Nalingguole River	Biotite schist	NLG-55-21	1607	58.5	1564	13.4	1532	19.5	1607	LA-ICPMS zircon U-Pb	He, 2016
Jinshuikou metamorphic complex	Nalingguole River	Biotite schist	NLG-55-22	998	75.1	992	16.6	990	14.3	990	LA-ICPMS zircon U-Pb	He, 2016
Jinshuikou metamorphic complex	Nalingguole River	Biotite schist	NLG-55-23	954	65.2	897	10.6	874	11.5	874	LA-ICPMS zircon U-Pb	He, 2016
Jinshuikou metamorphic complex	Nalingguole River	Biotite schist	NLG-55-24	565	72.3	535	8.4	528	7.2	528	LA-ICPMS zircon U-Pb	He, 2016
Jinshuikou metamorphic complex	Nalingguole River	Biotite schist	NLG-55-25	2504	51	2464	13.5	2416	28	2504	LA-ICPMS zircon U-Pb	He, 2016
Jinshuikou metamorphic complex	Nalingguole River	Biotite schist	NLG-55-26	2346	52.4	2341	14	2335	27.7	2346	LA-ICPMS zircon U-Pb	He, 2016
Jinshuikou metamorphic complex	Nalingguole River	Biotite schist	NLG-55-27	1015	63.1	941	10	909	11.8	909	LA-ICPMS zircon U-Pb	He, 2016
Jinshuikou metamorphic complex	Nalingguole River	Biotite schist	NLG-55-28	504	70.4	417	6	401	5.4	401	LA-ICPMS zircon U-Pb	He, 2016
Jinshuikou metamorphic complex	Nalingguole River	Biotite schist	NLG-55-29	536	98	421	12.5	400	6.3	400	LA-ICPMS zircon U-Pb	He, 2016
Jinshuikou metamorphic complex	Nalingguole River	Biotite schist	NLG-55-30	964	76.3	915	16.1	895	12.9	895	LA-ICPMS zircon U-Pb	He, 2016
Jinshuikou metamorphic complex	Nalingguole River	Biotite schist	NLG-55-31	959	65.2	930	10.8	917	12	917	LA-ICPMS zircon U-Pb	He, 2016
Jinshuikou metamorphic complex	Nalingguole River	Biotite schist	NLG-55-32	900	69	871	12	859	11.6	859	LA-ICPMS zircon U-Pb	He, 2016
Jinshuikou metamorphic complex	Nalingguole River	Biotite schist	NLG-55-33	936	64.9	882	10.1	860	11.2	860	LA-ICPMS zircon U-Pb	He, 2016
Jinshuikou metamorphic complex	Nalingguole River	Biotite schist	NLG-55-34	404	209.1	395	30.9	394	10.4	394	LA-ICPMS zircon U-Pb	He, 2016
Jinshuikou metamorphic complex	Nalingguole River	Biotite schist	NLG-55-35	1625	62.2	1484	15.9	1388	18.6	1625	LA-ICPMS zircon U-Pb	He, 2016
Jinshuikou metamorphic complex	Nalingguole River	Biotite schist	NLG-55-36	499	75.7	419	7.4	404	5.5	404	LA-ICPMS zircon U-Pb	He, 2016
Jinshuikou metamorphic complex	Nalingguole River	Biotite schist	NLG-55-37	1106	67.9	1059	14	1036	14	1106	LA-ICPMS zircon U-Pb	He, 2016
Jinshuikou metamorphic complex	Nalingguole River	Biotite schist	NLG-55-38	503	82.2	418	8.9	402	5.7	402	LA-ICPMS zircon U-Pb	He, 2016
Jinshuikou metamorphic complex	Nalingguole River	Biotite schist	NLG-55-39	866	101.9	780	23	750	13	750	LA-ICPMS zircon U-Pb	He, 2016
Jinshuikou metamorphic complex	Nalingguole River	Biotite schist	NLG-55-40	696	77	567	10.7	535	7.5	535	LA-ICPMS zircon U-Pb	He, 2016
Jinshuikou metamorphic complex	Nalingguole River	Biotite schist	NLG-55-41	799	69.9	692	10.1	659	8.8	659	LA-ICPMS zircon U-Pb	He, 2016
Jinshuikou metamorphic complex	Nalingguole River	Biotite schist	NLG-55-42	937	70.3	887	12.8	866	11.7	866	LA-ICPMS zircon U-Pb	He, 2016
Jinshuikou metamorphic complex	Nalingguole River	Biotite schist	NLG-55-43	598	125.8	4261	18.4	395	7.4	395	LA-ICPMS zircon U-Pb	He, 2016
Jinshuikou metamorphic complex	Nalingguole River	Biotite schist	NLG-55-44	935	65.1	882	10.1	861	11.1	861	LA-ICPMS zircon U-Pb	He, 2016
Jinshuikou metamorphic complex	Nalingguole River	Biotite schist	NLG-55-45	1572	60.1	1466	13.8	1393	17.7	1572	LA-ICPMS zircon U-Pb	He, 2016
Jinshuikou metamorphic complex	Nalingguole River	Biotite schist	NLG-55-46	843	66.1	667	8.4	616	8	616	LA-ICPMS zircon U-Pb	He, 2016
Jinshuikou metamorphic complex	Nalingguole River	Biotite schist	NLG-55-47	1602	58.1	1552	12.6	1514	18.5	1602	LA-ICPMS zircon U-Pb	He, 2016
Jinshuikou metamorphic complex	Nalingguole River	Biotite schist	NLG-55-48	1374	69.9	1314	18.5	1277	18.1	1374	LA-ICPMS zircon U-Pb	He, 2016
Jinshuikou metamorphic complex	Nalingguole River	Biotite schist	NLG-55-49	1728	58.6	1646	14.2	1582	19.8	1728	LA-ICPMS zircon U-Pb	He, 2016
Jinshuikou metamorphic complex	Nalingguole River	Biotite schist	NLG-55-50	2478	51.7	2462	13.6	2443	27.7	2478	LA-ICPMS zircon U-Pb	He, 2016
Jinshuikou metamorphic complex	Nalingguole River	Biotite schist	NLG-55-51	1213	63.3	1116	12.1	1067	13.6	1213	LA-ICPMS zircon U-Pb	He, 2016
Jinshuikou metamorphic complex	Nalingguole River	Biotite schist	NLG-55-52	657	81.9	449	10	409	5.8	409	LA-ICPMS zircon U-Pb	He, 2016
Jinshuikou metamorphic complex	Nalingguole River	Biotite schist	NLG-55-53	430	128.9	403	17.5	398	7.2	398	LA-ICPMS zircon U-Pb	He, 2016
Jinshuikou metamorphic complex	Nalingguole River	Biotite schist	NLG-55-54	1072	105.4	1014	29.7	986	18.4	986	LA-ICPMS zircon U-Pb	He, 2016
Jinshuikou metamorphic complex	Nalingguole River	Biotite schist	NLG-55-55	1858	61.9	1775	18.2	1705	23.1	1858	LA-ICPMS zircon U-Pb	He, 2016
Jinshuikou metamorphic complex	Nalingguole River	Biotite schist	NLG-55-56	964	74.5	858	14.4	818	11.4	818	LA-ICPMS zircon U-Pb	He, 2016
Jinshuikou metamorphic complex	Nalingguole River	Biotite schist	NLG-55-57	962	81.4	838	17	792	11.7	792	LA-ICPMS zircon U-Pb	He, 2016
Jinshuikou metamorphic complex	Nalingguole River	Biotite schist	NLG-55-58	1068	77.1	1005	17.7	976	14	976	LA-ICPMS zircon U-Pb	He, 2016
Jinshuikou metamorphic complex	Nalingguole River	Biotite schist	NLG-55-59	929	65.4	887	10	870	11	870	LA-ICPMS zircon U-Pb	He, 2016
Jinshuikou metamorphic complex	Nalingguole River	Biotite schist	NLG-55-60	311	97.4	383	10.8	395	5.8	395	LA-ICPMS zircon U-Pb	He, 2016
Jinshuikou metamorphic complex	Nalingguole River	Biotite schist	NLG-55-61	924	63.7	895	9.2	883	10.9	883	LA-ICPMS zircon U-Pb	He, 2016
Jinshuikou metamorphic complex	Nalingguole River	Biotite schist	NLG-55-62	547	95.9	429	12.3	407	6.2	407	LA-ICPMS zircon U-Pb	He, 2016
Jinshuikou metamorphic complex	Nalingguole River	Biotite schist	NLG-55-63	513	103.9	507	15.8	506	7.9	506	LA-ICPMS zircon U-Pb	He, 2016
Jinshuikou metamorphic complex	Nalingguole River	Biotite schist	NLG-55-64	783	75.2	725	12.3	705	9.5	705	LA-ICPMS zircon U-Pb	He, 2016
Jinshuikou metamorphic complex	Nalingguole River	Biotite schist	NLG-55-65	949	68.5	931	12.1	922	11.9	922	LA-ICPMS zircon U-Pb	He, 2016
Jinshuikou metamorphic complex	Nalingguole River	Biotite schist	NLG-55-66	743	107	674	21.6	653	10.9	653	LA-ICPMS zircon U-Pb	He, 2016
Jinshuikou metamorphic complex	Nalingguole River	Biotite schist	NLG-55-67	1762	57.3	1699	13.1	1648	19.7	1762	LA-ICPMS zircon U-Pb	He, 2016
Jinshuikou metamorphic complex	Nalingguole River	Biotite schist	NLG-55-68	1137	63.5	1088	11.4	1064	13.2	1137	LA-ICPMS zircon U-Pb	He, 2016
Jinshuikou metamorphic complex	Nalingguole River	Biotite schist	NLG-55-69	746	91.8	608	15.8	572	8.7	572	LA-ICPMS zircon U-Pb	He, 2016
Jinshuikou metamorphic complex	Nalingguole River	Biotite schist	NLG-55-70	859	78.2	794	14.6	771	10.7	771	LA-ICPMS zircon U-Pb	He, 2016
Jinshuikou metamorphic complex	Nalingguole River	Biotite schist	NLG-55-71	504	103.8	419	13.4	404	6.3	404	LA-ICPMS zircon U-Pb	He, 2016
Jinshuikou metamorphic complex	Nalingguole River	Biotite schist	NLG-55-72	1087	63.1	1045	10.4	1024	12.5	1087	LA-ICPMS zircon U-Pb	He, 2016
Jinshuikou metamorphic complex	Nalingguole River	Biotite schist	NLG-55-73	324	83.2	389	8.1	399	5.4	399	LA-ICPMS zircon U-Pb	He, 2016
Jinshuikou metamorphic complex	Nalingguole River	Biotite schist	NLG-55-74	930	67.3	931	11.3	931	11.7	931	LA-ICPMS zircon U-Pb	He, 2016
Jinshuikou metamorphic complex	Nalingguole River	Biotite schist	NLG-55-75	948	63.9	865	8.9	832	10.2	832	LA-ICPMS zircon U-Pb	He, 2016
Jinshuikou metamorphic complex	Nalingguole River	Biotite schist	NLG-55-76	442	83.3	406	8.7	400	5.5	400	LA-ICPMS zircon U-Pb	He, 2016
Jinshuikou metamorphic complex	Nalingguole River	Biotite schist	NLG-55-77	445	76.1	401	6.9	393	5.1	393	LA-ICPMS zircon U-Pb	He, 2016
Jinshuikou metamorphic complex	Nalingguole River	Biotite schist	NLG-55-78	565	103	429	13.8	403	6.3	403	LA-ICPMS zircon U-Pb	He, 2016
Jinshuikou metamorphic complex	Nalingguole River	Biotite schist	NLG-55-79	979	70.6	978	13.7	978	12.8	978	LA-ICPMS zircon U-Pb	He, 2016
Jinshuikou metamorphic complex	Nalingguole River	Biotite schist	NLG-55-80	2391	53.1	2355	14.1	2312	26.5	2391	LA-ICPMS zircon U-Pb	He, 2016
Jinshuikou metamorphic complex	Nalingguole River	Biotite schist	NLG-55-81	945	63.6	887	8.9	864	10.5	864	LA-ICPMS zircon U-Pb	He, 2016
Jinshuikou metamorphic complex	Nalingguole River	Biotite schist	NLG-55-82	873	69.8	712	10.2	661	8.5	661	LA-ICPMS zircon U-Pb	He, 2016
Jinshuikou metamorphic complex	Gouli	Garnet-bearing biotite-plagioclase gneiss	XRD082-1-01	1881	46	1749	45	1641	14	1881	LA-ICPMS zircon U-Pb	Chen, 2015
Jinshuikou metamorphic complex	Gouli	Garnet-bearing biotite-plagioclase gneiss	XRD082-1-02	1097	51	623	16	501	5	501	LA-ICPMS zircon U-Pb	Chen, 2015
Jinshuikou metamorphic complex	Gouli	Garnet-bearing biotite-plagioclase gneiss	XRD082-1-03	1406	49	1029	27	862	14	862	LA-ICPMS zircon U-Pb	Chen, 2015
Jinshuikou metamorphic complex	Gouli	Garnet-bearing biotite-plagioclase gneiss	XRD082-1-04	1363	50	1031	27	882	5	882	LA-ICPMS zircon U-Pb	Chen, 2015
Jinshuikou metamorphic complex	Gouli	Garnet-bearing biotite-plagioclase gneiss	XRD082-1-05	1110	53	734	22	617	17	617	LA-ICPMS zircon U-Pb	Chen, 2015
Jinshuikou metamorphic complex	Gouli	Garnet-bearing biotite-plagioclase gneiss	XRD082-1-06	2003	44	1205	32	810	13	810	LA-ICPMS zircon U-Pb	Chen, 2015
Jinshuikou metamorphic complex	Gouli	Garnet-bearing biotite-plagioclase gneiss	XRD082-1-07	1240	60	848	28	704	13	704	LA-ICPMS zircon U-Pb	Chen, 2015
Jinshuikou metamorphic complex	Gouli	Garnet-bearing biotite-plagioclase gneiss	XRD082-1-08	1677	48	1237	33	1001	13	1677	LA-ICPMS zircon U-Pb	Chen, 2015
Jinshuikou metamorphic complex	Gouli	Garnet-bearing biotite-plagioclase gneiss	XRD082-1-09	1583	47	1281	34	1110	18	1583	LA-ICPMS zircon U-Pb	Chen, 2015
Jinshuikou metamorphic complex	Gouli	Garnet-bearing biotite-plagioclase gneiss	XRD082-1-10	1449	47	1173	30	1031	9	1449	LA-ICPMS zircon U-Pb	Chen, 2015
Jinshuikou metamorphic complex	Gouli	Garnet-bearing biotite-plagioclase gneiss	XRD082-1-11	1654	51	1100	31	843	5	843	LA-ICPMS zircon U-Pb	Chen, 2015
Jinshuikou metamorphic complex	Gouli	Garnet-bearing biotite-plagioclase gneiss	XRD082-1-12	1905	47	1256	35	911	11	911	LA-ICPMS zircon U-Pb	Chen, 2015
Jinshuikou metamorphic complex	Gouli	Garnet-bearing biotite-plagioclase gneiss	XRD082-1-13	1925	49	921	26	561	8	561	LA-ICPMS zircon U-Pb	Chen, 2015
Jinshuikou metamorphic complex	Gouli	Garnet-bearing biotite-plagioclase gneiss	XRD082-1-14	1433	49	937	24	741	5	741	LA-ICPMS zircon U-Pb	Chen, 2015
Jinshuikou metamorphic complex	Gouli	Garnet-bearing biotite-plagioclase gneiss	XRD082-1-15	1424	48	1046	26	876	6	876	LA-ICPMS zircon U-Pb	Chen, 2015
Jinshuikou metamorphic complex	Gouli	Garnet-bearing biotite-plagioclase gneiss	XRD082-1-16	1943	52	1098	31	729	9	729	LA-ICPMS zircon U-Pb	Chen, 2015
Jinshuikou metamorphic complex	Gouli	Garnet-bearing biotite-plagioclase gneiss	XRD082-1-17	1105	50	719	18	602	5	602	LA-ICPMS zircon U-Pb	Chen, 2015
Jinshuikou metamorphic complex	Gouli	Garnet-bearing biotite-plagioclase gneiss	XRD082-1-18	1716	48	1217	31	957	7	957	LA-ICPMS zircon U-Pb	Chen, 2015
Jinshuikou metamorphic complex	Gouli	Garnet-bearing biotite-plagioclase gneiss	XRD082-1-19	1482	58	832	27	610	5	610	LA-ICPMS zircon U-Pb	Chen, 2015
Jinshuikou metamorphic complex	Gouli	Garnet-bearing biotite-plagioclase gneiss	XRD082-1-20	1241	52	846	26	700	19	700	LA-ICPMS zircon U-Pb	Chen, 2015
Jinshuikou metamorphic complex	Gouli	Garnet-bearing biotite-plagioclase gneiss	XRD082-1-21	1488	56	924	29	711	22	711	LA-ICPMS zircon U-Pb	Chen, 2015
Jinshuikou metamorphic complex	Gouli	Garnet-bearing biotite-plagioclase gneiss	XRD082-1-22	1462	56	981	30	781	11	781	LA-ICPMS zircon U-Pb	Chen, 2015
Jinshuikou metamorphic complex	Gouli	Garnet-bearing biotite-plagioclase gneiss	XRD082-1-23	1343	80	604	25	427	4	427	LA-ICPMS zircon U-Pb	Chen, 2015
Jinshuikou metamorphic complex	Gouli	Garnet-bearing biotite-plagioclase gneiss	XRD082-1-24	1800	49	1489	40	1282	13	1800	LA-ICPMS zircon U-Pb	Chen, 2015
Jinshuikou metamorphic complex	Gouli	Garnet-bearing biotite-plagioclase gneiss	XRD082-1-25	1633	54	1051	34	786	14	786	LA-ICPMS zircon U-Pb	Chen, 2015
Jinshuikou metamorphic complex	Gouli	Garnet-bearing biotite-plagioclase gneiss	XRD082-1-26	2263	48	1734	47	1337	15	2263	LA-ICPMS zircon U-Pb	Chen, 2015
Jinshuikou metamorphic complex	Gouli	Garnet-bearing biotite-plagioclase gneiss	XRD082-1-27	1516	51	912	28	677	12	677	LA-ICPMS zircon U-Pb	Chen, 2015
Jinshuikou metamorphic complex	Gouli	Garnet-bearing biotite-plagioclase gneiss	XRD082-1-28	2544	41	1956	49	1450	8	2544	LA-ICPMS zircon U-Pb	Chen, 2015
Jinshuikou metamorphic complex	Gouli	Garnet-bearing biotite-plagioclase gneiss	XRD082-1-29	2181	43	1626	45	1228	23	2181	LA-ICPMS zircon U-Pb	Chen, 2015
Jinshuikou metamorphic complex	Gouli	Garnet-bearing biotite-plagioclase gneiss	XRD082-1-30	1292	54	745	22	574	6	574	LA-ICPMS zircon U-Pb	Chen, 2015
Jinshuikou metamorphic complex	Gouli	Garnet-bearing biotite-plagioclase gneiss	XRD082-1-31	1181	56	797	23	667	6	667	LA-ICPMS zircon U-Pb	Chen, 2015
Jinshuikou metamorphic complex	Gouli	Garnet-bearing biotite-plagioclase gneiss	XRD082-1-32	1316	54	1199	38	1131	26	1316	LA-ICPMS zircon U-Pb	Chen, 2015
Jinshuikou metamorphic complex	Gouli	Garnet-bearing biotite-plagioclase gneiss	XRD082-1-33	1178	52	706	20	567	8	567	LA-ICPMS zircon U-Pb	Chen, 2015
Jinshuikou metamorphic complex	Gouli	Garnet-bearing biotite-plagioclase gneiss	XRD082-1-34	1580	48	1338	38	1190	24	1580	LA-ICPMS zircon U-Pb	Chen, 2015
Jinshuikou metamorphic complex	Gouli	Garnet-bearing biotite-plagioclase gneiss	XRD082-1-35	1465	48	983	25	782	6	782	LA-ICPMS zircon U-Pb	Chen, 2015
Jinshuikou metamorphic complex	Gouli	Garnet-bearing biotite-plagioclase gneiss	XRD082-1-36	2107	73	1078	50	633	12	633	LA-ICPMS zircon U-Pb	Chen, 2015
Jinshuikou metamorphic complex	Gouli	Garnet-bearing biotite-plagioclase gneiss	XRD082-1-37	2623	42	2324	59	2001	13	2623	LA-ICPMS zircon U-Pb	Chen, 2015
Jinshuikou metamorphic complex	Gouli	Garnet-bearing biotite-plagioclase gneiss	XRD082-1-38	1404	53	1070	34	913	25	913	LA-ICPMS zircon U-Pb	Chen, 2015
Jinshuikou metamorphic complex	Gouli	Garnet-bearing biotite-plagioclase gneiss	XRD082-1-39	1685	47	1067	30	791	17	791	LA-ICPMS zircon U-Pb	Chen, 2015
Jinshuikou metamorphic complex	Gouli	Garnet-bearing biotite-plagioclase gneiss	XRD082-1-40	1206	56	1054	31	983	9	983	LA-ICPMS zircon U-Pb	Chen, 2015
Jinshuikou metamorphic complex	Gouli	Garnet-bearing biotite-plagioclase gneiss	XRD082-1-41	1329	54	715	20	537	8	537	LA-ICPMS zircon U-Pb	Chen, 2015
Jinshuikou metamorphic complex	Gouli	Garnet-bearing biotite-plagioclase gneiss	XRD082-1-42	1295	50	822	21	658	4	658	LA-ICPMS zircon U-Pb	Chen, 2015
Jinshuikou metamorphic complex	Gouli	Garnet-bearing biotite-plagioclase gneiss	XRD082-1-43	1581	51	1153	36	936	24	936	LA-ICPMS zircon U-Pb	Chen, 2015
Jinshuikou metamorphic complex	Gouli	Garnet-bearing biotite-plagioclase gneiss	XRD082-1-44	2055	44	1981	50	1912	22	2055	LA-ICPMS zircon U-Pb	Chen, 2015
Jinshuikou metamorphic complex	Gouli	Garnet-bearing biotite-plagioclase gneiss	XRD082-1-45	1930	77	1300	62	943	19	943	LA-ICPMS zircon U-Pb	Chen, 2015
Jinshuikou metamorphic complex	Gouli	Garnet-bearing biotite-plagioclase gneiss	XRD082-1-46	1533	48	1440	37	1379	9	1533	LA-ICPMS zircon U-Pb	Chen, 2015
Jinshuikou metamorphic complex	Gouli	Garnet-bearing biotite-plagioclase gneiss	XRD082-1-47	1758	47	1455	39	1254	12	1758	LA-ICPMS zircon U-Pb	Chen, 2015
Jinshuikou metamorphic complex	Gouli	Garnet-bearing biotite-plagioclase gneiss	XRD082-1-48	900	72	906	32	909	9	909	LA-ICPMS zircon U-Pb	Chen, 2015
Jinshuikou metamorphic complex	Gouli	Garnet-bearing biotite-plagioclase gneiss	XRD082-1-49	1473	49	1215	32	1073	10	1473	LA-ICPMS zircon U-Pb	Chen, 2015
Jinshuikou metamorphic complex	Gouli	Garnet-bearing biotite-plagioclase gneiss	XRD082-1-50	1302	48	621	15	450	2	450	LA-ICPMS zircon U-Pb	Chen, 2015
Jinshuikou metamorphic complex	Gouli	Garnet-bearing biotite-plagioclase gneiss	XRD082-1-51	1118	51	880	23	789	13	789	LA-ICPMS zircon U-Pb	Chen, 2015
Jinshuikou metamorphic complex	Gouli	Garnet-bearing biotite-plagioclase gneiss	XRD082-1-52	1168	52	1155	33	1145	21	1168	LA-ICPMS zircon U-Pb	Chen, 2015
Jinshuikou metamorphic complex	Gouli	Garnet-bearing biotite-plagioclase gneiss	XRD082-1-53	1328	49	840	22	668	5	668	LA-ICPMS zircon U-Pb	Chen, 2015
Jinshuikou metamorphic complex	Gouli	Garnet-bearing biotite-plagioclase gneiss	XRD082-1-54	1094	53	844	29	746	26	746	LA-ICPMS zircon U-Pb	Chen, 2015
Jinshuikou metamorphic complex	Gouli	Garnet-bearing biotite-plagioclase gneiss	XRD082-1-55	1188	50	1212	32	1224	10	1188	LA-ICPMS zircon U-Pb	Chen, 2015
Jinshuikou metamorphic complex	Gouli	Garnet-bearing biotite-plagioclase gneiss	XRD082-1-56	1119	63	1109	38	1105	28	1119	LA-ICPMS zircon U-Pb	Chen, 2015
Jinshuikou metamorphic complex	Gouli	Garnet-bearing biotite-plagioclase gneiss	XRD082-1-58	1100	55	768	23	657	11	657	LA-ICPMS zircon U-Pb	Chen, 2015
Jinshuikou metamorphic complex	Gouli	Garnet-bearing biotite-plagioclase gneiss	XRD082-1-59	1361	55	1062	30	924	12	924	LA-ICPMS zircon U-Pb	Chen, 2015
Jinshuikou metamorphic complex	Gouli	Garnet-bearing biotite-plagioclase gneiss	XRD082-1-60	1544	49	957	25	722	5	722	LA-ICPMS zircon U-Pb	Chen, 2015
Jinshuikou metamorphic complex	Gouli	Garnet-bearing biotite-plagioclase gneiss	XRD082-4-1	1385	58	906	28	722	6	722	LA-ICPMS zircon U-Pb	Chen, 2015
Jinshuikou metamorphic complex	Gouli	Garnet-bearing biotite-plagioclase gneiss	XRD082-4-2	1613	55	1082	34	838	6	838	LA-ICPMS zircon U-Pb	Chen, 2015
Jinshuikou metamorphic complex	Gouli	Garnet-bearing biotite-plagioclase gneiss	XRD082-4-3	1617	52	1148	33	917	4	917	LA-ICPMS zircon U-Pb	Chen, 2015
Jinshuikou metamorphic complex	Gouli	Garnet-bearing biotite-plagioclase gneiss	XRD082-4-5	1686	54	1064	33	788	4	788	LA-ICPMS zircon U-Pb	Chen, 2015
Jinshuikou metamorphic complex	Gouli	Garnet-bearing biotite-plagioclase gneiss	XRD082-4-6	1522	53	1173	34	994	5	994	LA-ICPMS zircon U-Pb	Chen, 2015
Jinshuikou metamorphic complex	Gouli	Garnet-bearing biotite-plagioclase gneiss	XRD082-4-7	1778	52	1269	40	989	9	989	LA-ICPMS zircon U-Pb	Chen, 2015
Jinshuikou metamorphic complex	Gouli	Garnet-bearing biotite-plagioclase gneiss	XRD082-4-8	1962	49	1447	46	1124	18	1962	LA-ICPMS zircon U-Pb	Chen, 2015
Jinshuikou metamorphic complex	Gouli	Garnet-bearing biotite-plagioclase gneiss	XRD082-4-9	1161	63	594	21	456	4	456	LA-ICPMS zircon U-Pb	Chen, 2015
Jinshuikou metamorphic complex	Gouli	Garnet-bearing biotite-plagioclase gneiss	XRD082-4-10	1931	63	1030	34	662	6	662	LA-ICPMS zircon U-Pb	Chen, 2015
Jinshuikou metamorphic complex	Gouli	Garnet-bearing biotite-plagioclase gneiss	XRD082-4-11	2931	48	1686	59	869	11	869	LA-ICPMS zircon U-Pb	Chen, 2015
Jinshuikou metamorphic complex	Gouli	Garnet-bearing biotite-plagioclase gneiss	XRD082-4-13	3584	44	1962	61	802	6	802	LA-ICPMS zircon U-Pb	Chen, 2015
Jinshuikou metamorphic complex	Gouli	Garnet-bearing biotite-plagioclase gneiss	XRD082-4-14	1788	52	1103	32	790	7	790	LA-ICPMS zircon U-Pb	Chen, 2015
Jinshuikou metamorphic complex	Gouli	Garnet-bearing biotite-plagioclase gneiss	XRD082-4-15	1316	59	819	24	649	5	649	LA-ICPMS zircon U-Pb	Chen, 2015
Jinshuikou metamorphic complex	Gouli	Garnet-bearing biotite-plagioclase gneiss	XRD082-4-16	1379	54	1130	34	1005	8	1379	LA-ICPMS zircon U-Pb	Chen, 2015
Jinshuikou metamorphic complex	Gouli	Garnet-bearing biotite-plagioclase gneiss	XRD082-4-17	1956	49	1863	52	1782	7	1956	LA-ICPMS zircon U-Pb	Chen, 2015
Jinshuikou metamorphic complex	Gouli	Garnet-bearing biotite-plagioclase gneiss	XRD082-4-18	1434	60	886	28	683	2	683	LA-ICPMS zircon U-Pb	Chen, 2015
Jinshuikou metamorphic complex	Gouli	Garnet-bearing biotite-plagioclase gneiss	XRD082-4-19	2276	53	1205	35	702	9	702	LA-ICPMS zircon U-Pb	Chen, 2015
Jinshuikou metamorphic complex	Gouli	Garnet-bearing biotite-plagioclase gneiss	XRD082-4-20	2645	61	1107	42	495	4	495	LA-ICPMS zircon U-Pb	Chen, 2015
Jinshuikou metamorphic complex	Gouli	Garnet-bearing biotite-plagioclase gneiss	XRD082-4-21	1827	52	1122	34	794	6	794	LA-ICPMS zircon U-Pb	Chen, 2015
Jinshuikou metamorphic complex	Gouli	Garnet-bearing biotite-plagioclase gneiss	XRD082-4-22	1187	71	558	21	416	2	416	LA-ICPMS zircon U-Pb	Chen, 2015
Jinshuikou metamorphic complex	Gouli	Garnet-bearing biotite-plagioclase gneiss	XRD082-4-27	1507	53	1210	34	1051	5	1507	LA-ICPMS zircon U-Pb	Chen, 2015
Jinshuikou metamorphic complex	Gouli	Garnet-bearing biotite-plagioclase gneiss	XRD082-4-28	2391	64	984	37	478	2	478	LA-ICPMS zircon U-Pb	Chen, 2015
Jinshuikou metamorphic complex	Gouli	Garnet-bearing biotite-plagioclase gneiss	XRD082-4-29	2328	58	954	31	474	6	474	LA-ICPMS zircon U-Pb	Chen, 2015
Jinshuikou metamorphic complex	Gouli	Garnet-bearing biotite-plagioclase gneiss	XRD082-4-31	1266	60	579	20	419	4	419	LA-ICPMS zircon U-Pb	Chen, 2015
Jinshuikou metamorphic complex	Gouli	Garnet-bearing biotite-plagioclase gneiss	XRD082-4-33	2900	50	1320	41	570	2	570	LA-ICPMS zircon U-Pb	Chen, 2015
Jinshuikou metamorphic complex	Gouli	Garnet-bearing biotite-plagioclase gneiss	XRD082-4-35	1270	80	645	27	482	3	482	LA-ICPMS zircon U-Pb	Chen, 2015
Jinshuikou metamorphic complex	Gouli	Garnet-bearing biotite-plagioclase gneiss	XRD082-4-36	1522	74	769	29	537	4	537	LA-ICPMS zircon U-Pb	Chen, 2015
Jinshuikou metamorphic complex	Gouli	Garnet-bearing biotite-plagioclase gneiss	XRD082-4-39	1361	61	688	22	500	2	500	LA-ICPMS zircon U-Pb	Chen, 2015
Jinshuikou metamorphic complex	Gouli	Garnet-bearing biotite-plagioclase gneiss	XRD082-4-40	1719	51	1217	34	953	3	953	LA-ICPMS zircon U-Pb	Chen, 2015
Jinshuikou metamorphic complex	Gouli	Garnet-bearing biotite-plagioclase gneiss	XRD082-4-41	1510	55	853	29	623	10	623	LA-ICPMS zircon U-Pb	Chen, 2015
Jinshuikou metamorphic complex	Gouli	Garnet-bearing biotite-plagioclase gneiss	XRD082-4-42	1885	51	1068	32	713	5	713	LA-ICPMS zircon U-Pb	Chen, 2015
Jinshuikou metamorphic complex	Gouli	Garnet-bearing biotite-plagioclase gneiss	XRD082-4-43	1405	55	737	24	537	7	537	LA-ICPMS zircon U-Pb	Chen, 2015
Jinshuikou metamorphic complex	Gouli	Garnet-bearing biotite-plagioclase gneiss	XRD082-4-44	1679	52	929	27	646	4	646	LA-ICPMS zircon U-Pb	Chen, 2015
Jinshuikou metamorphic complex	Gouli	Garnet-bearing biotite-plagioclase gneiss	XRD082-4-45	1693	53	870	28	583	6	583	LA-ICPMS zircon U-Pb	Chen, 2015
Jinshuikou metamorphic complex	Gouli	Garnet-bearing biotite-plagioclase gneiss	XRD082-4-46	1787	53	831	24	521	2	521	LA-ICPMS zircon U-Pb	Chen, 2015
Jinshuikou metamorphic complex	Gouli	Garnet-bearing biotite-plagioclase gneiss	XRD082-4-47	1371	55	1121	34	999	13	999	LA-ICPMS zircon U-Pb	Chen, 2015
Jinshuikou metamorphic complex	Gouli	Garnet-bearing biotite-plagioclase gneiss	XRD082-4-48	1398	57	772	23	576	4	576	LA-ICPMS zircon U-Pb	Chen, 2015
Jinshuikou metamorphic complex	Gouli	Garnet-bearing biotite-plagioclase gneiss	XRD082-4-49	1890	56	703	22	392	2	392	LA-ICPMS zircon U-Pb	Chen, 2015
Jinshuikou metamorphic complex	Gouli	Garnet-bearing biotite-plagioclase gneiss	XRD082-4-50	987	56	612	17	516	2	516	LA-ICPMS zircon U-Pb	Chen, 2015
Jinshuikou metamorphic complex	Gouli	Garnet-bearing biotite-plagioclase gneiss	XRD082-4-51	1546	54	814	25	573	3	573	LA-ICPMS zircon U-Pb	Chen, 2015
Jinshuikou metamorphic complex	Gouli	Garnet-bearing biotite-plagioclase gneiss	XRD082-4-52	2953	50	1083	33	400	2	400	LA-ICPMS zircon U-Pb	Chen, 2015
Jinshuikou metamorphic complex	Gouli	Garnet-bearing biotite-plagioclase gneiss	XRD082-4-54	1590	55	933	29	680	3	680	LA-ICPMS zircon U-Pb	Chen, 2015
Jinshuikou metamorphic complex	Gouli	Garnet-bearing biotite-plagioclase gneiss	XRD082-4-56	1735	52	920	27	619	6	619	LA-ICPMS zircon U-Pb	Chen, 2015
Jinshuikou metamorphic complex	Gouli	Garnet-bearing biotite-plagioclase gneiss	XRD082-4-57	1966	53	1141	32	762	8	762	LA-ICPMS zircon U-Pb	Chen, 2015
Jinshuikou metamorphic complex	Gouli	Garnet-bearing biotite-plagioclase gneiss	XRD082-4-59	1132	67	619	22	488	3	488	LA-ICPMS zircon U-Pb	Chen, 2015
Jinshuikou metamorphic complex	Gouli	Garnet-bearing biotite-plagioclase gneiss	XRD082-4-60	1822	52	1074	31	746	4	746	LA-ICPMS zircon U-Pb	Chen, 2015
Xiaomiao metamorphic complex	Kekesha	Biotite plagioclase gneiss	11023-6-1	608	7	633	8	723	18	723	LA-ICPMS zircon U-Pb	Chen, 2015
Xiaomiao metamorphic complex	Kekesha	Biotite plagioclase gneiss	11023-6-2	2068	20	2058	14	2048	14	2068	LA-ICPMS zircon U-Pb	Chen, 2015
Xiaomiao metamorphic complex	Kekesha	Biotite plagioclase gneiss	11023-6-3	1680	17	1703	14	1731	16	1680	LA-ICPMS zircon U-Pb	Chen, 2015
Xiaomiao metamorphic complex	Kekesha	Biotite plagioclase gneiss	11023-6-4	1640	17	1640	15	1640	18	1640	LA-ICPMS zircon U-Pb	Chen, 2015
Xiaomiao metamorphic complex	Kekesha	Biotite plagioclase gneiss	11023-6-5	1894	18	1837	14	1774	14	1894	LA-ICPMS zircon U-Pb	Chen, 2015
Xiaomiao metamorphic complex	Kekesha	Biotite plagioclase gneiss	11023-6-6	1603	18	1664	23	1741	57	1603	LA-ICPMS zircon U-Pb	Chen, 2015
Xiaomiao metamorphic complex	Kekesha	Biotite plagioclase gneiss	11023-6-7	1753	17	1706	14	1648	15	1753	LA-ICPMS zircon U-Pb	Chen, 2015
Xiaomiao metamorphic complex	Kekesha	Biotite plagioclase gneiss	11023-6-8	244	3	267	5	478	25	478	LA-ICPMS zircon U-Pb	Chen, 2015
Xiaomiao metamorphic complex	Kekesha	Biotite plagioclase gneiss	11023-6-9	1844	18	1875	14	1911	35	1844	LA-ICPMS zircon U-Pb	Chen, 2015
Xiaomiao metamorphic complex	Kekesha	Biotite plagioclase gneiss	11023-6-10	2002	19	2027	14	2053	14	2002	LA-ICPMS zircon U-Pb	Chen, 2015
Xiaomiao metamorphic complex	Kekesha	Biotite plagioclase gneiss	11023-6-11	2353	24	2368	21	2382	46	2353	LA-ICPMS zircon U-Pb	Chen, 2015
Xiaomiao metamorphic complex	Kekesha	Biotite plagioclase gneiss	11023-6-12	2635	25	2688	16	2729	14	2635	LA-ICPMS zircon U-Pb	Chen, 2015
Xiaomiao metamorphic complex	Kekesha	Biotite plagioclase gneiss	11023-6-13	252	3	277	5	491	25	491	LA-ICPMS zircon U-Pb	Chen, 2015
Xiaomiao metamorphic complex	Kekesha	Biotite plagioclase gneiss	11023-6-14	2099	20	2001	14	1900	14	2099	LA-ICPMS zircon U-Pb	Chen, 2015
Xiaomiao metamorphic complex	Kekesha	Biotite plagioclase gneiss	11023-6-15	1925	19	1823	14	1708	15	1925	LA-ICPMS zircon U-Pb	Chen, 2015
Xiaomiao metamorphic complex	Kekesha	Biotite plagioclase gneiss	11023-6-16	2591	24	2583	16	2577	14	2591	LA-ICPMS zircon U-Pb	Chen, 2015
Xiaomiao metamorphic complex	Kekesha	Biotite plagioclase gneiss	11023-6-17	1982	19	1803	14	1603	15	1982	LA-ICPMS zircon U-Pb	Chen, 2015
Xiaomiao metamorphic complex	Kekesha	Biotite plagioclase gneiss	11023-6-18	1649	17	1640	14	1629	17	1649	LA-ICPMS zircon U-Pb	Chen, 2015
Xiaomiao metamorphic complex	Kekesha	Biotite plagioclase gneiss	11023-6-19	501	6	515	9	580	57	580	LA-ICPMS zircon U-Pb	Chen, 2015
Xiaomiao metamorphic complex	Kekesha	Biotite plagioclase gneiss	11023-6-20	1414	14	1484	13	1585	16	1414	LA-ICPMS zircon U-Pb	Chen, 2015
Xiaomiao metamorphic complex	Kekesha	Biotite plagioclase gneiss	11023-6-21	1930	19	1835	14	1729	15	1930	LA-ICPMS zircon U-Pb	Chen, 2015
Xiaomiao metamorphic complex	Kekesha	Biotite plagioclase gneiss	11023-6-22	2326	22	2358	16	2385	36	2326	LA-ICPMS zircon U-Pb	Chen, 2015
Xiaomiao metamorphic complex	Kekesha	Biotite plagioclase gneiss	11023-6-24	1819	18	1857	15	1900	16	1819	LA-ICPMS zircon U-Pb	Chen, 2015
Xiaomiao metamorphic complex	Kekesha	Biotite plagioclase gneiss	11023-6-25	1589	16	1588	15	1586	18	1589	LA-ICPMS zircon U-Pb	Chen, 2015
Xiaomiao metamorphic complex	Kekesha	Biotite plagioclase gneiss	11023-6-26	1528	16	1526	16	1524	20	1528	LA-ICPMS zircon U-Pb	Chen, 2015
Xiaomiao metamorphic complex	Kekesha	Biotite plagioclase gneiss	11023-6-27	1671	17	1640	15	1600	18	1671	LA-ICPMS zircon U-Pb	Chen, 2015
Xiaomiao metamorphic complex	Kekesha	Biotite plagioclase gneiss	11023-6-28	1350	14	1392	13	1458	17	1350	LA-ICPMS zircon U-Pb	Chen, 2015
Xiaomiao metamorphic complex	Kekesha	Biotite plagioclase gneiss	11023-6-29	2070	20	1921	15	1764	17	2070	LA-ICPMS zircon U-Pb	Chen, 2015
Xiaomiao metamorphic complex	Kekesha	Biotite plagioclase gneiss	11023-6-30	1340	14	1481	14	1690	17	1340	LA-ICPMS zircon U-Pb	Chen, 2015
Xiaomiao metamorphic complex	Kekesha	Biotite plagioclase gneiss	11023-6-31	1906	19	1985	16	2068	17	1906	LA-ICPMS zircon U-Pb	Chen, 2015
Xiaomiao metamorphic complex	Kekesha	Biotite plagioclase gneiss	11023-6-32	1735	18	1701	15	1661	18	1735	LA-ICPMS zircon U-Pb	Chen, 2015
Xiaomiao metamorphic complex	Kekesha	Biotite plagioclase gneiss	11023-6-33	1551	16	1631	15	1737	18	1551	LA-ICPMS zircon U-Pb	Chen, 2015
Xiaomiao metamorphic complex	Kekesha	Biotite plagioclase gneiss	11023-6-34	1384	14	1549	15	1782	18	1384	LA-ICPMS zircon U-Pb	Chen, 2015
Xiaomiao metamorphic complex	Kekesha	Biotite plagioclase gneiss	11023-6-35	1744	18	1715	16	1679	20	1744	LA-ICPMS zircon U-Pb	Chen, 2015
Xiaomiao metamorphic complex	Kekesha	Biotite plagioclase gneiss	11023-6-36	1848	19	1756	16	1648	18	1848	LA-ICPMS zircon U-Pb	Chen, 2015
Xiaomiao metamorphic complex	Kekesha	Biotite plagioclase gneiss	11023-6-37	1817	18	1726	16	1618	19	1817	LA-ICPMS zircon U-Pb	Chen, 2015
Xiaomiao metamorphic complex	Kekesha	Biotite plagioclase gneiss	11023-6-38	1316	14	1485	16	1734	20	1316	LA-ICPMS zircon U-Pb	Chen, 2015
Xiaomiao metamorphic complex	Kekesha	Biotite plagioclase gneiss	11023-6-39	2008	20	2116	17	2223	18	2008	LA-ICPMS zircon U-Pb	Chen, 2015
Xiaomiao metamorphic complex	Kekesha	Biotite plagioclase gneiss	11023-6-40	1310	14	1369	19	1462	54	1310	LA-ICPMS zircon U-Pb	Chen, 2015
Xiaomiao metamorphic complex	Kekesha	Biotite plagioclase gneiss	11023-6-41	1939	21	1948	19	1957	22	1939	LA-ICPMS zircon U-Pb	Chen, 2015
Xiaomiao metamorphic complex	Kekesha	Biotite plagioclase gneiss	11023-6-42	1714	18	1702	16	1686	20	1714	LA-ICPMS zircon U-Pb	Chen, 2015
Xiaomiao metamorphic complex	Kekesha	Biotite plagioclase gneiss	11023-6-43	1925	20	1946	17	1968	20	1925	LA-ICPMS zircon U-Pb	Chen, 2015
Xiaomiao metamorphic complex	Kekesha	Biotite plagioclase gneiss	11023-6-44	1786	19	1706	17	1609	21	1786	LA-ICPMS zircon U-Pb	Chen, 2015
Xiaomiao metamorphic complex	Kekesha	Biotite plagioclase gneiss	11023-6-45	1629	17	1609	16	1583	21	1629	LA-ICPMS zircon U-Pb	Chen, 2015
Xiaomiao metamorphic complex	Kekesha	Biotite plagioclase gneiss	11023-6-46	1633	17	1620	17	1602	22	1633	LA-ICPMS zircon U-Pb	Chen, 2015
Xiaomiao metamorphic complex	Kekesha	Biotite plagioclase gneiss	11023-6-47	1850	19	1724	17	1576	21	1850	LA-ICPMS zircon U-Pb	Chen, 2015
Xiaomiao metamorphic complex	Kekesha	Biotite plagioclase gneiss	11023-6-48	1584	17	1578	17	1570	23	1584	LA-ICPMS zircon U-Pb	Chen, 2015
Xiaomiao metamorphic complex	Kekesha	Biotite plagioclase gneiss	11023-6-49	1745	18	1657	17	1547	22	1745	LA-ICPMS zircon U-Pb	Chen, 2015
Xiaomiao metamorphic complex	Kekesha	Biotite plagioclase gneiss	11023-6-50	1729	18	1733	20	1739	50	1729	LA-ICPMS zircon U-Pb	Chen, 2015
Xiaomiao metamorphic complex	Kekesha	Biotite plagioclase gneiss	11023-6-51	2012	21	1807	18	1579	22	2012	LA-ICPMS zircon U-Pb	Chen, 2015
Xiaomiao metamorphic complex	Kekesha	Biotite plagioclase gneiss	11023-6-52	2332	28	2332	29	2333	61	2332	LA-ICPMS zircon U-Pb	Chen, 2015
Xiaomiao metamorphic complex	Kekesha	Biotite plagioclase gneiss	11023-6-53	1976	21	1785	18	1569	23	1976	LA-ICPMS zircon U-Pb	Chen, 2015
Xiaomiao metamorphic complex	Kekesha	Biotite plagioclase gneiss	11023-6-54	1618	17	1685	18	1770	23	1618	LA-ICPMS zircon U-Pb	Chen, 2015
Xiaomiao metamorphic complex	Tatuo	quartzite	XRD120/4-1	2290	36	2149	51	1999	35	2290	LA-ICPMS zircon U-Pb	Chen, 2015
Xiaomiao metamorphic complex	Tatuo	quartzite	XRD120/4-2	1761	35	1608	32	1494	8	1761	LA-ICPMS zircon U-Pb	Chen, 2015
Xiaomiao metamorphic complex	Tatuo	quartzite	XRD120/4-3	1881	36	1857	38	1838	15	1881	LA-ICPMS zircon U-Pb	Chen, 2015
Xiaomiao metamorphic complex	Tatuo	quartzite	XRD120/4-4	2063	40	1979	46	1899	12	2063	LA-ICPMS zircon U-Pb	Chen, 2015
Xiaomiao metamorphic complex	Tatuo	quartzite	XRD120/4-5	1598	34	1580	30	1566	12	1598	LA-ICPMS zircon U-Pb	Chen, 2015
Xiaomiao metamorphic complex	Tatuo	quartzite	XRD120/4-6	2403	31	2374	48	2339	26	2403	LA-ICPMS zircon U-Pb	Chen, 2015
Xiaomiao metamorphic complex	Tatuo	quartzite	XRD120/4-7	1781	33	1722	34	1674	20	1781	LA-ICPMS zircon U-Pb	Chen, 2015
Xiaomiao metamorphic complex	Tatuo	quartzite	XRD120/4-8	1921	33	1798	34	1694	10	1921	LA-ICPMS zircon U-Pb	Chen, 2015
Xiaomiao metamorphic complex	Tatuo	quartzite	XRD120/4-9	2603	31	2598	49	2592	14	2603	LA-ICPMS zircon U-Pb	Chen, 2015
Xiaomiao metamorphic complex	Tatuo	quartzite	XRD120/4-10	1690	33	1569	29	1481	9	1690	LA-ICPMS zircon U-Pb	Chen, 2015
Xiaomiao metamorphic complex	Tatuo	quartzite	XRD120/4-11	1698	34	1696	33	1694	13	1698	LA-ICPMS zircon U-Pb	Chen, 2015
Xiaomiao metamorphic complex	Tatuo	quartzite	XRD120/4-12	1641	34	1638	32	1635	17	1641	LA-ICPMS zircon U-Pb	Chen, 2015
Xiaomiao metamorphic complex	Tatuo	quartzite	XRD120/4-13	1778	36	1777	36	1777	11	1778	LA-ICPMS zircon U-Pb	Chen, 2015
Xiaomiao metamorphic complex	Tatuo	quartzite	XRD120/4-14	2347	34	2257	49	2156	28	2347	LA-ICPMS zircon U-Pb	Chen, 2015
Xiaomiao metamorphic complex	Tatuo	quartzite	XRD120/4-15	2405	36	2301	50	2187	20	2405	LA-ICPMS zircon U-Pb	Chen, 2015
Xiaomiao metamorphic complex	Tatuo	quartzite	XRD120/4-16	2151	33	2044	47	1931	32	2151	LA-ICPMS zircon U-Pb	Chen, 2015
Xiaomiao metamorphic complex	Tatuo	quartzite	XRD120/4-17	1551	34	1537	28	1527	8	1551	LA-ICPMS zircon U-Pb	Chen, 2015
Xiaomiao metamorphic complex	Tatuo	quartzite	XRD120/4-18	2391	31	2274	44	2146	19	2391	LA-ICPMS zircon U-Pb	Chen, 2015
Xiaomiao metamorphic complex	Tatuo	quartzite	XRD120/4-19	2076	34	1856	36	1669	11	2076	LA-ICPMS zircon U-Pb	Chen, 2015
Xiaomiao metamorphic complex	Tatuo	quartzite	XRD120/4-20	1774	34	1772	34	1771	10	1774	LA-ICPMS zircon U-Pb	Chen, 2015
Xiaomiao metamorphic complex	Tatuo	quartzite	XRD120/4-21	1795	33	1777	33	1763	9	1795	LA-ICPMS zircon U-Pb	Chen, 2015
Xiaomiao metamorphic complex	Tatuo	quartzite	XRD120/4-22	1765	33	1740	33	1720	12	1765	LA-ICPMS zircon U-Pb	Chen, 2015
Xiaomiao metamorphic complex	Tatuo	quartzite	XRD120/4-23	2371	32	2222	52	2055	37	2371	LA-ICPMS zircon U-Pb	Chen, 2015
Xiaomiao metamorphic complex	Tatuo	quartzite	XRD120/4-24	1799	33	1781	33	1768	9	1799	LA-ICPMS zircon U-Pb	Chen, 2015
Xiaomiao metamorphic complex	Tatuo	quartzite	XRD120/4-25	1721	33	1679	32	1646	11	1721	LA-ICPMS zircon U-Pb	Chen, 2015
Xiaomiao metamorphic complex	Tatuo	quartzite	XRD120/4-26	1904	41	1686	39	1516	10	1904	LA-ICPMS zircon U-Pb	Chen, 2015
Xiaomiao metamorphic complex	Tatuo	quartzite	XRD120/4-27	2501	33	2366	47	2211	14	2501	LA-ICPMS zircon U-Pb	Chen, 2015
Xiaomiao metamorphic complex	Tatuo	quartzite	XRD120/4-28	2547	30	1703	32	1105	17	2547	LA-ICPMS zircon U-Pb	Chen, 2015
Xiaomiao metamorphic complex	Tatuo	quartzite	XRD120/4-29	1801	34	1782	34	1764	9	1801	LA-ICPMS zircon U-Pb	Chen, 2015
Xiaomiao metamorphic complex	Tatuo	quartzite	XRD120/4-30	1710	34	1687	32	1669	8	1710	LA-ICPMS zircon U-Pb	Chen, 2015
Xiaomiao metamorphic complex	Tatuo	quartzite	XRD120/4-31	2430	30	2415	45	2397	20	2430	LA-ICPMS zircon U-Pb	Chen, 2015
Xiaomiao metamorphic complex	Tatuo	quartzite	XRD120/4-32	1817	34	1805	34	1795	9	1817	LA-ICPMS zircon U-Pb	Chen, 2015
Xiaomiao metamorphic complex	Tatuo	quartzite	XRD120/4-33	2036	32	2034	38	2033	15	2036	LA-ICPMS zircon U-Pb	Chen, 2015
Xiaomiao metamorphic complex	Tatuo	quartzite	XRD120/4-34	1851	35	1847	38	1842	20	1851	LA-ICPMS zircon U-Pb	Chen, 2015
Xiaomiao metamorphic complex	Tatuo	quartzite	XRD120/4-35	1878	32	1844	35	1813	13	1878	LA-ICPMS zircon U-Pb	Chen, 2015
Xiaomiao metamorphic complex	Tatuo	quartzite	XRD120/4-36	2624	31	2595	50	2557	20	2624	LA-ICPMS zircon U-Pb	Chen, 2015
Xiaomiao metamorphic complex	Tatuo	quartzite	XRD120/4-37	1787	34	1760	34	1739	17	1787	LA-ICPMS zircon U-Pb	Chen, 2015
Xiaomiao metamorphic complex	Tatuo	quartzite	XRD120/4-38	1870	34	1814	35	1767	10	1870	LA-ICPMS zircon U-Pb	Chen, 2015
Xiaomiao metamorphic complex	Tatuo	quartzite	XRD120/4-39	2196	34	2050	50	1896	35	2196	LA-ICPMS zircon U-Pb	Chen, 2015
Xiaomiao metamorphic complex	Tatuo	quartzite	XRD120/4-40	1832	33	1843	34	1854	13	1832	LA-ICPMS zircon U-Pb	Chen, 2015
Xiaomiao metamorphic complex	Tatuo	quartzite	XRD120/4-41	1772	33	1744	33	1721	16	1772	LA-ICPMS zircon U-Pb	Chen, 2015
Xiaomiao metamorphic complex	Tatuo	quartzite	XRD120/4-42	1747	34	1749	33	1750	12	1747	LA-ICPMS zircon U-Pb	Chen, 2015
Xiaomiao metamorphic complex	Tatuo	quartzite	XRD120/4-43	1726	33	1729	32	1732	10	1726	LA-ICPMS zircon U-Pb	Chen, 2015
Xiaomiao metamorphic complex	Tatuo	quartzite	XRD120/4-44	1804	33	1799	33	1796	13	1804	LA-ICPMS zircon U-Pb	Chen, 2015
Xiaomiao metamorphic complex	Tatuo	quartzite	XRD120/4-45	1748	33	1736	33	1727	19	1748	LA-ICPMS zircon U-Pb	Chen, 2015
Xiaomiao metamorphic complex	Tatuo	quartzite	XRD120/4-46	1827	33	1524	30	1317	23	1827	LA-ICPMS zircon U-Pb	Chen, 2015
Binggou metamorphic complex	Hongshuihe iron deposit	quartzite	NMH-50-01	918	63.7	869	9.5	850	10.8	850	LA-ICPMS zircon U-Pb	He, 2016
Binggou metamorphic complex	Hongshuihe iron deposit	quartzite	NMH-50-02	1719	55.7	1714	12.3	1710	20.3	1719	LA-ICPMS zircon U-Pb	He, 2016
Binggou metamorphic complex	Hongshuihe iron deposit	quartzite	NMH-50-03	1733	56.2	1723	12.9	1714	20.6	1733	LA-ICPMS zircon U-Pb	He, 2016
Binggou metamorphic complex	Hongshuihe iron deposit	quartzite	NMH-50-04	945	72.7	826	13.6	782	10.8	782	LA-ICPMS zircon U-Pb	He, 2016
Binggou metamorphic complex	Hongshuihe iron deposit	quartzite	NMH-50-05	921	77.8	786	15	739	10.7	739	LA-ICPMS zircon U-Pb	He, 2016
Binggou metamorphic complex	Hongshuihe iron deposit	quartzite	NMH-50-06	626	83.1	489	11	461	6.6	461	LA-ICPMS zircon U-Pb	He, 2016
Binggou metamorphic complex	Hongshuihe iron deposit	quartzite	NMH-50-07	901	73.7	806	13.6	773	10.7	773	LA-ICPMS zircon U-Pb	He, 2016
Binggou metamorphic complex	Hongshuihe iron deposit	quartzite	NMH-50-08	900	64.3	831	9.4	806	10.3	806	LA-ICPMS zircon U-Pb	He, 2016
Binggou metamorphic complex	Hongshuihe iron deposit	quartzite	NMH-50-09	649	88.7	443	11.6	405	6.1	405	LA-ICPMS zircon U-Pb	He, 2016
Binggou metamorphic complex	Hongshuihe iron deposit	quartzite	NMH-50-10	423	94.7	412	11.5	410	6.2	410	LA-ICPMS zircon U-Pb	He, 2016
Binggou metamorphic complex	Hongshuihe iron deposit	quartzite	NMH-50-11	537	95.2	426	12.1	406	6.2	406	LA-ICPMS zircon U-Pb	He, 2016
Binggou metamorphic complex	Hongshuihe iron deposit	quartzite	NMH-50-12	559	138.4	431	20.9	407	8.1	407	LA-ICPMS zircon U-Pb	He, 2016
Binggou metamorphic complex	Hongshuihe iron deposit	quartzite	NMH-50-13	586	90.5	433	11.6	404	6.1	404	LA-ICPMS zircon U-Pb	He, 2016
Binggou metamorphic complex	Hongshuihe iron deposit	quartzite	NMH-50-14	549	85.2	429	10.2	407	5.9	407	LA-ICPMS zircon U-Pb	He, 2016
Binggou metamorphic complex	Hongshuihe iron deposit	quartzite	NMH-50-15	977	65.9	926	11.5	905	11.8	905	LA-ICPMS zircon U-Pb	He, 2016
Binggou metamorphic complex	Hongshuihe iron deposit	quartzite	NMH-50-16	1054	77	939	17.1	891	13	891	LA-ICPMS zircon U-Pb	He, 2016
Binggou metamorphic complex	Hongshuihe iron deposit	quartzite	NMH-50-17	932	74.5	812	14.1	769	10.9	769	LA-ICPMS zircon U-Pb	He, 2016
Binggou metamorphic complex	Hongshuihe iron deposit	quartzite	NMH-50-18	972	65.8	931	11	914	11.8	914	LA-ICPMS zircon U-Pb	He, 2016
Binggou metamorphic complex	Hongshuihe iron deposit	quartzite	NMH-50-19	889	66.9	886	11.3	885	11.6	885	LA-ICPMS zircon U-Pb	He, 2016
Binggou metamorphic complex	Hongshuihe iron deposit	quartzite	NMH-50-20	419	85.4	412	9.6	410	5.9	410	LA-ICPMS zircon U-Pb	He, 2016
Binggou metamorphic complex	Hongshuihe iron deposit	quartzite	NMH-50-21	508	150.8	474	24.7	466	9.9	466	LA-ICPMS zircon U-Pb	He, 2016
Binggou metamorphic complex	Hongshuihe iron deposit	quartzite	NMH-50-22	917	65.4	902	10.8	896	11.6	896	LA-ICPMS zircon U-Pb	He, 2016
Binggou metamorphic complex	Hongshuihe iron deposit	quartzite	NMH-50-23	947	66.8	892	11.6	869	11.5	869	LA-ICPMS zircon U-Pb	He, 2016
Binggou metamorphic complex	Hongshuihe iron deposit	quartzite	NMH-50-24	621	91.4	440	12	406	6.2	406	LA-ICPMS zircon U-Pb	He, 2016
Binggou metamorphic complex	Hongshuihe iron deposit	quartzite	NMH-50-25	529	131.9	428	19.4	410	7.8	410	LA-ICPMS zircon U-Pb	He, 2016
Binggou metamorphic complex	Hongshuihe iron deposit	quartzite	NMH-50-26	958	66.7	899	11.7	875	11.6	875	LA-ICPMS zircon U-Pb	He, 2016
Binggou metamorphic complex	Hongshuihe iron deposit	quartzite	NMH-50-27	925	69.8	850	12.6	822	11.2	822	LA-ICPMS zircon U-Pb	He, 2016
Binggou metamorphic complex	Hongshuihe iron deposit	quartzite	NMH-50-28	646	113.9	445	16.9	407	7.2	407	LA-ICPMS zircon U-Pb	He, 2016
Binggou metamorphic complex	Hongshuihe iron deposit	quartzite	NMH-50-29	404	144.6	406	20.4	406	8.1	406	LA-ICPMS zircon U-Pb	He, 2016
Binggou metamorphic complex	Hongshuihe iron deposit	quartzite	NMH-50-30	335	123.3	393	16	403	7	403	LA-ICPMS zircon U-Pb	He, 2016
Binggou metamorphic complex	Hongshuihe iron deposit	quartzite	NMH-50-31	434	77.6	408	7.8	404	5.5	404	LA-ICPMS zircon U-Pb	He, 2016
Binggou metamorphic complex	Hongshuihe iron deposit	quartzite	NMH-50-32	434	80.4	409	8.5	405	5.7	405	LA-ICPMS zircon U-Pb	He, 2016
Binggou metamorphic complex	Hongshuihe iron deposit	quartzite	NMH-50-33	534	93.4	424	11.8	404	6.2	404	LA-ICPMS zircon U-Pb	He, 2016
Binggou metamorphic complex	Hongshuihe iron deposit	quartzite	NMH-50-34	531	129.7	422	18.7	402	7.5	402	LA-ICPMS zircon U-Pb	He, 2016
Binggou metamorphic complex	Hongshuihe iron deposit	quartzite	NMH-50-35	991	62.4	943	10.1	922	11.8	922	LA-ICPMS zircon U-Pb	He, 2016
Binggou metamorphic complex	Hongshuihe iron deposit	quartzite	NMH-50-36	544	131.3	479	21.2	465	9	465	LA-ICPMS zircon U-Pb	He, 2016
Binggou metamorphic complex	Hongshuihe iron deposit	quartzite	NMH-50-37	552	71.8	428	7	405	5.5	405	LA-ICPMS zircon U-Pb	He, 2016
Binggou metamorphic complex	Hongshuihe iron deposit	quartzite	NMH-50-38	443	111.1	412	14.7	407	6.8	407	LA-ICPMS zircon U-Pb	He, 2016
Binggou metamorphic complex	Hongshuihe iron deposit	quartzite	NMH-50-39	433	88.9	410	10.3	405	6	405	LA-ICPMS zircon U-Pb	He, 2016
Binggou metamorphic complex	Hongshuihe iron deposit	quartzite	NMH-50-40	943	75.5	785	14.4	730	10.5	730	LA-ICPMS zircon U-Pb	He, 2016
Binggou metamorphic complex	Hongshuihe iron deposit	quartzite	NMH-50-41	881	66.4	862	10.9	854	11.2	854	LA-ICPMS zircon U-Pb	He, 2016
Binggou metamorphic complex	Hongshuihe iron deposit	quartzite	NMH-50-42	439	68.8	414	5.7	410	5.4	410	LA-ICPMS zircon U-Pb	He, 2016
Binggou metamorphic complex	Hongshuihe iron deposit	quartzite	NMH-50-43	1020	71.9	862	14.1	801	11.3	801	LA-ICPMS zircon U-Pb	He, 2016
Binggou metamorphic complex	Hongshuihe iron deposit	quartzite	NMH-50-44	927	88.5	719	17.9	654	10.4	654	LA-ICPMS zircon U-Pb	He, 2016
Binggou metamorphic complex	Hongshuihe iron deposit	quartzite	NMH-50-45	950	64.8	886	10.7	861	11.3	861	LA-ICPMS zircon U-Pb	He, 2016
Binggou metamorphic complex	Hongshuihe iron deposit	quartzite	NMH-50-46	918	64.1	836	9.7	805	10.5	805	LA-ICPMS zircon U-Pb	He, 2016
Binggou metamorphic complex	Hongshuihe iron deposit	quartzite	NMH-50-47	1031	64.2	922	11	877	11.5	877	LA-ICPMS zircon U-Pb	He, 2016
Binggou metamorphic complex	Hongshuihe iron deposit	quartzite	NMH-50-48	410	101.9	407	12.8	407	6.5	407	LA-ICPMS zircon U-Pb	He, 2016
Binggou metamorphic complex	Hongshuihe iron deposit	quartzite	NMH-50-49	568	97.6	431	13	406	6.5	406	LA-ICPMS zircon U-Pb	He, 2016
References Chen, Y.X., 2015, The composition and geological evolution of Pre-cambrain metamorphic rocks in east region of East Kunlun Orgenic Belt [Ph.D. thesis] [in Chinese with English abstract]: Xi'an, Chang'an University, 179 p. He, D.F., 2016, Tectonic evolution of the Precambrian metamorphic rock in East Kunlun Orogenic Belt [Ph.D. thesis] [in Chinese with English abstract]: Xi'an, Northwes…
